# Supplementary material for: Linkage and regional association analysis reveal two new tightly-linked major-QTLs for pod number and seed number per pod in rapeseed (Brassica napus L.)
Source: PubMed Central journal article supplement (PMC4593047; doi:10.1038/srep14481), 2015-10-05
Supplement: srep14481-s1.pdf [file srep14481-s1.pdf]

# Supplementary Information

## **Linkage and regional association analysis reveal two new tightly-linked major-QTLs for pod number and seed number per pod in rapeseed**

Jiaqin Shi<sup>1‡</sup>, Jiepeng Zhan<sup>1‡</sup>, Yuhua Yang<sup>1</sup>, Jiang Ye<sup>1</sup>, Shunmou Huang<sup>1</sup>, Ruiyuan Li<sup>2</sup>, Xinfu Wang<sup>1</sup>, Guihua Liu<sup>1</sup>, Hanzhong Wang<sup>1\*</sup>

<sup>1</sup>Key Laboratory of Oil Crop Biology of the Ministry of Agriculture, Oil Crops Research Institute of the Chinese Academy of Agricultural Sciences, Wuhan 430062, China.

<sup>2</sup>Key Laboratory of Information and Computing Science, Guizhou Normal University, Guiyang 550001, China.

<sup>‡</sup>These authors contributed equally to this work.

\*Corresponding author: Hanzhong Wang.

Tel: +86-027-86711916;

Fax: +86-027-86811837;

E-mail: wanghz@oilcrops.cn.

**Table S1 Summary statistics for primer-pairs screening for parents and marker genotyping in the BnaZNF<sub>2</sub> population.**

| Marker type  | Prefix of primer-pairs  | Screened primer-pairs | Polymorphic primer-pairs | Polymorphic markers | Source of primer-pairs                                                                                    |
|--------------|-------------------------|-----------------------|--------------------------|---------------------|-----------------------------------------------------------------------------------------------------------|
| InDel        | BnID                    | 76                    | 33                       | 34                  | our unpublished data                                                                                      |
| SNP          | IGF                     | 98                    | 4                        | 4                   | <a href="http://brassica.nbi.ac.uk/IMSORB/">http://brassica.nbi.ac.uk/IMSORB/</a>                         |
|              | ns                      | 294                   | 108                      | 110                 | Huang et al. 2013                                                                                         |
|              | snap                    | 2200                  | 46                       | 48                  | Wang et al.2012                                                                                           |
| SSR          | BN                      | 24                    | 2                        | 2                   | Kresovich et al. (1995); Szewc-McFadden AK et al.(1996)                                                   |
|              | BnEMS,BnGMS,BoGMS,BrGMS | 602                   | 63                       | 71                  | Cheng et al (2009); Xu et al (2010); Li et al (2010)                                                      |
|              | BoSF, BrSF, BnSF        | 4275                  | 517                      | 566                 | Shi et al. 2014                                                                                           |
|              | BRAS,CB                 | 373                   | 35                       | 37                  | Piquemal et al. (2005); Radoev et al. 2008                                                                |
|              | BRMS                    | 40                    | 4                        | 4                   | Suwabe et al. 2002                                                                                        |
|              | CNU                     | 191                   | 43                       | 49                  | Kim et al. (2009)                                                                                         |
|              | ENA                     | 13                    | 2                        | 2                   | Choi et al. (2007)                                                                                        |
|              | FITO                    | 255                   | 6                        | 6                   | Iniguez-Luy et al. 2009                                                                                   |
|              | HRI                     | 6                     | 1                        | 1                   | Smith LB and King GJ (2000)                                                                               |
|              | KS                      | 50                    | 5                        | 5                   | <a href="http://www.brassica.info/resource/markers.php">http://www.brassica.info/resource/markers.php</a> |
|              | MB                      | 5                     | 0                        | 0                   | Lagercrantz et al. (1993)                                                                                 |
|              | MD                      | 2                     | 1                        | 1                   | Uzanova and Ecke (1999)                                                                                   |
|              | MR                      | 8                     | 6                        | 6                   | Uzanova and Ecke (1999)                                                                                   |
|              | Na,Ni,OI,Ra             | 398                   | 24                       | 27                  | Lowe et al. 2004                                                                                          |
|              | nga                     | 30                    | 0                        | 0                   | Bell and Ecker (1994)                                                                                     |
|              | niab                    | 144                   | 20                       | 23                  | Kim et al. (2009)                                                                                         |
|              | SA                      | 3                     | 1                        | 1                   | Qiut et al. (2006)                                                                                        |
| sN,sO,sR,sS  | 85                      | 28                    | 29                       | AAFC Consortium     |                                                                                                           |
| STS          | AT, IFLP,TF             | 179                   | 12                       | 12                  | Sun et al. 2013                                                                                           |
| <b>Total</b> |                         | <b>9351</b>           | <b>961</b>               | <b>1038</b>         |                                                                                                           |

**Table S2** List of 561 newly developed and mapped markers (499 SSR, 31 SNP and 31 InDel) on the BnaZNF2 linkage map.

| Marker_name | Marker_Typ | Forward_Primer (5'-3')   | Reverse_Primer (5'-3') |
|-------------|------------|--------------------------|------------------------|
| BnID035a    | InDel      | GGAATAAGTTGCTTGGGTTGC    | GCCAGCGAGGTTCTCAGC     |
| BnID040     | InDel      | TTTCATCCAAGGAGTAGCGG     | CCGTTGACAAAAAGGGCTAC   |
| BnID041     | InDel      | GTTCCGTTTCGGGTTTCATCTA   | GCTCTTCGAACACGTTCTCC   |
| BnID042     | InDel      | TTCCAACCTGGAACGCAAAT     | GTGACCAGGCTCATCGAAAT   |
| BnID043     | InDel      | TTCGATACCACCACCAGACA     | CATCCTCCTCCTCCATTTGA   |
| BnID044     | InDel      | CCCATGAGGACAAGGAAGAA     | CAACCGTTTGTCAAAGACTGA  |
| BnID045     | InDel      | CCTGGTTGTGCATTTCCCTT     | ATGGCTTTACACGGAGCAGT   |
| BnID046     | InDel      | CCAGCCATGAGAGTTAGGGA     | TGGTGGAGTGTTGGTTTTTG   |
| BnID047     | InDel      | CCCTTTCAATATGAGAGAGAGGA  | TTAATTTGGATATGCATGGGC  |
| BnID052     | InDel      | GAGGGAACAAAAGAGAGCCA     | GGATCACCAGCTGAGGAAGA   |
| BnID053     | InDel      | GCTCATAACCGATGAACATTCTTT | TGTTTCGGATAAGCCTTCTTGA |
| BnID056     | InDel      | TGGTGC ACTACAAGA ACATGG  | ATGACCCCATGCAACCTTAC   |
| BnID060     | InDel      | CAAGCATCGAGTTCCACTCA     | CATTATTGTTACGGCCCGAT   |
| BnID061     | InDel      | ACCCCATTTGTCTTGG AATCA   | CGGAATAACTGCACCGAAAC   |
| BnID062     | InDel      | GCGACACGTCTCTGGAGAAT     | TGCAAGTGCATCCAAAGTTC   |
| BnID063     | InDel      | ACGCTTTTCCCCTTAGGAAC     | GCACATTCTTCCCTTTTTGC   |
| BnID075     | InDel      | CGCCCTTCAAATACAAGCTC     | CTTCCTGAAAGCGTCTACCG   |
| BnID076     | InDel      | AGCTAAGAGCTGAAGCACGG     | AGATGCTGAAATTCGTCTGTGA |
| BnID078     | InDel      | TTATGAGGAGGTGACTGGGTG    | GCGCAGACACCTATGGAAAT   |
| BnID079     | InDel      | CAGTCCTGAGCTATTTGGTCC    | AACTACGGAAGGGTCAAGCC   |
| BnID081     | InDel      | GGAGGGAGGGTGCAAGTATT     | CACCAACCGTTTTTTCATTCC  |
| BnID082     | InDel      | TACGACCCGCCAAATATCAT     | GACGTTTTGGGTATCTGTTCG  |
| BnID085     | InDel      | CCCTTCCTTCTCCATTCTCC     | GGCCCATTA AACTCTCACGA  |
| BnID086     | InDel      | TCTGTTCTCATGCTGTGGCT     | TCCCCTTGGTGTTTTGTCTC   |
| BnID087     | InDel      | CTTCCCCGACCAA AATGAT     | AAGCAAGAGGGGAAAAGAGC   |
| BnID090     | InDel      | CTCGACGTCTGGGAGATCA      | ATCGGCATTCCGTGATAGAT   |
| BnID094     | InDel      | CACATGAAACCCACC ACTGA    | GGCCCGTACTATGATCCTCA   |

|             |       |                            |                       |
|-------------|-------|----------------------------|-----------------------|
| BnID095     | InDel | GACAACGGCTAGGGTTTCAA       | TGAGAGCTCTGTTGCGAAAA  |
| BnID097     | InDel | TTGCTTTAGCGGAGCTTGTT       | GCAAGCCGGTTATTGAATTT  |
| BnID107     | InDel | AAGCACACGTGTCCCACTTT       | TGCAGCCAAAAGAGAACCTT  |
| BnID108     | InDel | AACTCTCGGCCCATGAACTA       | CGGTATCGGAGGAATGAGAA  |
| BnSF2342-39 | SSR   | GGCGAACAAGAAACCGATTA       | TTCCGAATTAACCGCAAAC   |
| BnSF287-186 | SSR   | CAGATACATGTGAAAGTTTGAAACAA | ATGTAAACCTCCCCGGTTTT  |
| BnSF400-253 | SSR   | ATCACCAATGCCATCCTCAT       | ATTCAAGACATTTGGCCTGC  |
| BnSF400-28  | SSR   | AAATTGCAACCCATAACACA       | TCCCACACTAGAGAGAGCGAA |
| BnSF400-29  | SSR   | TTGAATCGAATCAGGAAGGG       | CATTTAGCAACCTCCACCGT  |
| BnSF400-54  | SSR   | TGTCGTTTGATGGATGCCTA       | GAGGACTCGGTCTGAACTCG  |
| BoSF0016    | SSR   | GGCGAGGAGGTTGTTGATTA       | CTTCGACGGAGATTTTCGAG  |
| BoSF0017    | SSR   | GGGCATTTCTTTTCGTGGTA       | CTCACGGACTTTGCTGACAA  |
| BoSF0022a   | SSR   | TGCCATCAAAGGAGTGTTCA       | TCATCTGCTCAACATGAGGC  |
| BoSF0022b   | SSR   | TGCCATCAAAGGAGTGTTCA       | TCATCTGCTCAACATGAGGC  |
| BoSF0023    | SSR   | CCCTATTTGCGTGCCTCTAT       | GAAACCACCCATCAAGGAAA  |
| BoSF0033a   | SSR   | GTTGTGGTCTGCCAAAAGGT       | CGCAGGAAACTGTAAGAGCC  |
| BoSF0040    | SSR   | CCAAAATTTGCATGAAAGCC       | CAGCTTGTGCTTGTCTTCTTG |
| BoSF0050a   | SSR   | TGTACGTGCACCACGTTTTT       | CTTCGATTACTCGGTGGCAT  |
| BoSF0050b   | SSR   | TGTACGTGCACCACGTTTTT       | CTTCGATTACTCGGTGGCAT  |
| BoSF0096    | SSR   | CTTGGTCCGTTGCTCTTTTC       | AACTGATCGAAAGCTCGCAT  |
| BoSF0114    | SSR   | TCTGCCAAATTGACCAGAGA       | TGTAAATGGAACAAGCAAGCA |
| BoSF0130    | SSR   | AAATCCAAACCCACAACCAA       | CCCATCACAGAGGCAAGAGT  |
| BoSF0132    | SSR   | GGTCATCCACATTGGTTAGAAA     | GAGGAGTGTCCAGGACCGTA  |
| BoSF0133    | SSR   | CGTTTCGAGTGTCTCACCAA       | TCGAGGCTAGGTTTTGCAGT  |
| BoSF0160    | SSR   | GAAGGTCCTTACATGGTGAAGC     | AAACACAGTGCTGATGCAGG  |
| BoSF0176    | SSR   | ATGAAAACCAACAATCACGCA      | TTTCGATGGCACAAAATTG   |
| BoSF0185    | SSR   | ATGGACTGTGTTTTTGGTCG       | ATGAAACCAAGGCAAAAATGC |
| BoSF0197    | SSR   | CGGATTCATCAACCTCGTCT       | CTCACCGCTTCAAATCCAT   |
| BoSF0213    | SSR   | GAAAATCCTGCAAACCCTGA       | CTCTCCATATCTCCGGACCA  |
| BoSF0215    | SSR   | CAGGTCACTACAAGTGGGCA       | TCCCTATCCATGAGACGAGC  |

|           |     |                        |                          |
|-----------|-----|------------------------|--------------------------|
| BoSF0216  | SSR | GAGCCTTTGCACACGAAAAC   | GGCGTCTAATAGCATGTACAAGTG |
| BoSF0222  | SSR | CTCTTCCCACCGGTATTCTT   | CGAGTTCACCGAGCACAATA     |
| BoSF0223  | SSR | AGCTCACGAATCTGCTCCAT   | CCGAAACCAAGATAGGTGGA     |
| BoSF0224a | SSR | TTCACAAGGCTTCTCAGCAA   | CTGATCTTGGAATGCCGTTT     |
| BoSF0224b | SSR | TTCACAAGGCTTCTCAGCAA   | CTGATCTTGGAATGCCGTTT     |
| BoSF0230  | SSR | GGCAAAGAAGAGACAGCGA    | AGTGGGGGACCATAAACCTC     |
| BoSF0231  | SSR | CTCGTGGTTCAGGACTCCAT   | GTGGCGAGTTTTGATTTGGT     |
| BoSF0232  | SSR | CAGACTCTTTGACCGCCATT   | GCTCCGGTCAGATCCATAAA     |
| BoSF0239  | SSR | TGTGTGGAACAGTGTTTGAA   | TCTCTGGCTCTCTTTCGCTC     |
| BoSF0259  | SSR | GTGGTTGGAATATCGACGC    | TGAAGCTCACAAATCGCAAG     |
| BoSF0270  | SSR | TGAACCGTGACAGAGAGTGC   | CCTCACCCAAAAGCCAAGTA     |
| BoSF0284  | SSR | TCTCTACTTTCTCGGGTGGG   | GCGTGTCTCCTCCCTCTAC      |
| BoSF0302  | SSR | CATGCGGAAGCATTGAGTA    | CCGATCGAGCTCATGATAAA     |
| BoSF0310  | SSR | TCCCTCAACATACCCATTGA   | TGTCCATGACCATTGCTTGT     |
| BoSF0318  | SSR | CAAACAGGCCCGTCTCTAAG   | AGGTGGAGCTGCATTTGATT     |
| BoSF0329  | SSR | AACCGTTACAGACACCGCTC   | AGGAAGCTTTATCCCCCAGA     |
| BoSF0333  | SSR | CGATCAGTACCAGCCGAAAT   | TCTCTCAGCTCCTCAACCGT     |
| BoSF0336a | SSR | CCGAATCTTCCATTTACCGA   | CCATGTCCATCTTCGCTTTT     |
| BoSF0336b | SSR | CCGAATCTTCCATTTACCGA   | CCATGTCCATCTTCGCTTTT     |
| BoSF0346  | SSR | AAAACATTGGGGCAAATCAA   | GCGAGACGTATTGTTTGGGT     |
| BoSF0349  | SSR | AAACCCACACATCATCTTCCA  | AGCATCTTTGCTCTTGGCAT     |
| BoSF0365  | SSR | GAGATTGGAAGAGCGCAAAC   | ACCCCAAGCCTGGTTAGACT     |
| BoSF0371  | SSR | TCAACAAACCAGTAACCACGTT | CAACACGAGCCAGAGATGAA     |
| BoSF0393  | SSR | TCGAATGGTTGTTTGTGTTG   | GCGAGACGTATTGTTTGGGT     |
| BoSF0402  | SSR | CCTTACGCAAGACCAGAAGC   | GACTCGAAGCTGTGGTGACA     |
| BoSF0415a | SSR | AGCAGAAACGAAACCTGCAT   | TCGTTAAGGTGTGGAGTGATTG   |
| BoSF0415b | SSR | AGCAGAAACGAAACCTGCAT   | TCGTTAAGGTGTGGAGTGATTG   |
| BoSF0421  | SSR | GGACAAAAGTGTGTCATGCG   | AAGGTAAGCCGTTCCGTTCT     |
| BoSF0442  | SSR | TCGTTGGTCTTGCCTTTCTT   | CGTATTTCTTGAGTGCAAACG    |
| BoSF0448  | SSR | CTTCTCAAATCCTGGTGGA    | AAGCATCAAACCCATCAAC      |

|           |     |                        |                       |
|-----------|-----|------------------------|-----------------------|
| BoSF0455b | SSR | TCGAATGCCATATCACAGGA   | ACCACCATAGCCAAAACCAA  |
| BoSF0455c | SSR | TCGAATGCCATATCACAGGA   | ACCACCATAGCCAAAACCAA  |
| BoSF0466  | SSR | TAGCATGTTCTGAACCGTCAG  | AAATAACTGGACGCCCAAAA  |
| BoSF0482  | SSR | GGTGATCAACCATTGCAACA   | GACTCCACCGAAGGTACCAA  |
| BoSF0483  | SSR | GCATCTGATCTTTCCGCTTC   | GGTTTTGTTTTGATTGGGACA |
| BoSF0495  | SSR | TCTCCTTGCATCGGCTAAGT   | TTTTGGGCTGTTTAGTTCCG  |
| BoSF0503  | SSR | ACCATGGCCTCTTGTATTGC   | CGGAGTGTTCCCAATCAACT  |
| BoSF0513  | SSR | CCTTTTACAAAGGCAATTGAGA | AAAACCCTGAACACACCGAG  |
| BoSF0521  | SSR | CTCACGAGCTATTGATCGCA   | CACGAATGATGAGCCAAGAA  |
| BoSF0525b | SSR | GGAGAATAGCAGGCAGCAAC   | TTGACCCAAGCATGCAAATA  |
| BoSF0546  | SSR | GCGTAGGTCGTTGACAGACA   | GCTCCCATGGTAGTGTGGT   |
| BoSF0552  | SSR | GCCCTAAACATGGCATTGTC   | GGGTTTCTTCAAACACCAGAA |
| BoSF0554  | SSR | TGCGTCACAACCCTTTCATA   | TGCGCGGATCTTAAGCTAGT  |
| BoSF0560  | SSR | GGATTGCAGAGGACGAGGTA   | GCGCAATTGCTGTAAAAAGA  |
| BoSF0582  | SSR | CACACATGGTGGCTTTCTTG   | GATTTCCCGACAAAGTTCCA  |
| BoSF0586a | SSR | GAACAGACGAAACGACAGGC   | AGCACCAAAGCTATCCCAG   |
| BoSF0592  | SSR | TTTGAAACGGAGGACATCAA   | CCATGTGATCGCCATTGTTA  |
| BoSF0598  | SSR | GTATGAAGGACAACGCGACA   | TTAGCAGACTTTAGCGCCGT  |
| BoSF0600  | SSR | GGGGCCCAACTTTTACCTTA   | TATTTTGTTCAGCCGTTG    |
| BoSF0601  | SSR | AAAACCCCACTTTTGACGTG   | CCGTCTGTTATCATCCTCGAT |
| BoSF0613  | SSR | TGGAATTGTCTCCCAAATC    | CGAACTGAACCCGAATGAGT  |
| BoSF0643  | SSR | TAGCCCTACTGGCCCCTATT   | CGCACTCCGGTTTCTCTAAA  |
| BoSF0652  | SSR | TCTTCCTCCTCCCTCCATTT   | ACGTAAACCTGAGGAGCGAA  |
| BoSF0664  | SSR | TTCTCTGCGTTTTTCAGGTGAT | CCTAAGAGCCGTGACATGGT  |
| BoSF0665  | SSR | AAAATCGGGGGTTATCTTGC   | TTGGCCAAAGTTTCTAGCGT  |
| BoSF0670  | SSR | ATCTTCCTCCACGTTTCATGC  | TGAGGAGTGTGTGTGTGTGTG |
| BoSF0678a | SSR | AACTTTCTCTCCTCCACGCA   | TTTCCGCCGATAAAAAGAGA  |
| BoSF0693  | SSR | ATGCATCTTAGCTGGCACAT   | TTTCTCGCCAGAATCGAACT  |
| BoSF0707  | SSR | ACTTCCAATGGGGGTTCTTC   | GGCGTTCTTTGCTATACCGT  |
| BoSF0711a | SSR | GAGGCGATTTCGTCGTTCTAA  | ATTGGCCATTTTCAGTGAGGT |

|           |     |                            |                          |
|-----------|-----|----------------------------|--------------------------|
| BoSF0711b | SSR | GAGGCGATTTCGTCGTTCTAA      | ATTGGCCATTTTCAGTGAGGT    |
| BoSF0718  | SSR | CAAAACGTGGCTAACAACCA       | TTTCGTCGGTTTAGGTTTCG     |
| BoSF0733  | SSR | CGTGGACATAACGGACAATG       | CTTGAAGCTCTCCAGCAAGAA    |
| BoSF0757  | SSR | CAAAGTGGTTGTGCATTGG        | GCTCTTGAATGGCGTCTAC      |
| BoSF0760  | SSR | CCAAACGGTCATTTTCGTCTT      | CAGGAGGAAGGAATCGATGA     |
| BoSF0764  | SSR | CCCAAGTTCGCTTAATGGTT       | GTTCTGGGGCAAATGACTGT     |
| BoSF0778  | SSR | GAGTCCACCGATCAAGAAA        | GATGAGAGAGATCAGGGAAGGA   |
| BoSF0783a | SSR | GCCTTGGATGAAGACAGAGG       | GCGGTGAAGGGTGTAAGTGT     |
| BoSF0783b | SSR | GCCTTGGATGAAGACAGAGG       | GCGGTGAAGGGTGTAAGTGT     |
| BoSF0784  | SSR | GCTTTCTCAGAGGTGCGTTC       | CACTTCCGTAGGAGGTGCAT     |
| BoSF0805  | SSR | GCCCCATCCATATAACCATTG      | ATATGGAGGCGTGGCATTAC     |
| BoSF0840  | SSR | GCGAAGCTTCCTTTGTCATC       | ATCTGAGACGGAGCGTGAGT     |
| BoSF0841b | SSR | AGCGGTGGAAAGCTACTTCA       | CAACACCGTCGATCCCTATC     |
| BoSF0869  | SSR | AGCACCGCCGATGACTATAC       | TGAAGCGAGAGGACGAATCT     |
| BoSF0872b | SSR | TGGAAATAGGCATATTACATTGG    | GAAGAGCAGGAAGTTTTGGC     |
| BoSF0880  | SSR | ACGATTCCAATCACAAAGGC       | GTCGTCGTTGCTCTCCTTCT     |
| BoSF0883  | SSR | TGAATGTGTGTGTGTGGAGTG      | GGCGCATCCAATACCTAACA     |
| BoSF0898  | SSR | ATTCAGTACAAAGGCCGTGC       | TGGAATGTGCTTCAGAGTGC     |
| BoSF0911  | SSR | ATTCCCGGAGGATCAAAAAG       | GATGACCAGTCAAAGAGCCC     |
| BoSF0926a | SSR | TTCCAACAAACTCATGCCAG       | AACAAAAGGGATGACGTTGC     |
| BoSF0926b | SSR | TTCCAACAAACTCATGCCAG       | AACAAAAGGGATGACGTTGC     |
| BoSF0926c | SSR | TTCCAACAAACTCATGCCAG       | AACAAAAGGGATGACGTTGC     |
| BoSF0935  | SSR | TGGCGATCGAGTTATGTGAA       | GTCCGGTTATGTCTGTGCCT     |
| BoSF0943  | SSR | AGCCGCGTTAATTTGCTAAG       | GGGAGTGGGTTAGGGTTTA      |
| BoSF0948  | SSR | GGCCAAGAGAAAAGGAAACC       | CGTCCATAACCGTCTCATCC     |
| BoSF0949  | SSR | TCAGATTAAGGGAGCAACCG       | AAGCAGCCGAAAATGCTAAA     |
| BoSF0952a | SSR | GGGTTTCATATCAAAAATAAAAAGCA | TGTTGCATAGAGTTCTCCATAGAT |
| BoSF0952b | SSR | GGGTTTCATATCAAAAATAAAAAGCA | TGTTGCATAGAGTTCTCCATAGAT |
| BoSF0955  | SSR | ATCACCAGCATCACCATGAA       | TGCTCACATAATTGTCAATACAGC |
| BoSF0960  | SSR | CATTGTACATGACCGCCAAC       | TGCGTGCTCTTTTGATATGC     |

|           |     |                             |                        |
|-----------|-----|-----------------------------|------------------------|
| BoSF0980  | SSR | CTAGCACCATTGGATCGACA        | CCCCGAATCAATCATCAAAC   |
| BoSF0997  | SSR | TTCACATGATAACACCATTGAACA    | CCAAACTCTTAAAAAGGGACCA |
| BoSF1005  | SSR | CAACCTCGGATTTTGATTCG        | ATTCATTTGTGCAGCAGTGG   |
| BoSF1009  | SSR | TCGCTGAAGAGGAGGAACAT        | TTTCTCTCCTCGCTGGGTTA   |
| BoSF1017  | SSR | GCCACAAGTGTTTCCTTTCC        | CACAACTTTGCCGGTGTATG   |
| BoSF1064  | SSR | ATGCCCGCAAGTATAAAGTAGT      | AGTACCGTCACCTGGATTCG   |
| BoSF1085  | SSR | GCCACACATCAGACACCAAC        | TCTGTGGCCATGTTAGTGGA   |
| BoSF1088  | SSR | TTCAAACCTTTTGGCGATTCC       | ACGAAAACAAAACAGGTCCG   |
| BoSF1098  | SSR | TTCAGCGTTGACTCTTCCTG        | ACTCCTTTGTTGTTCCGTGC   |
| BoSF1121  | SSR | TGTGTACCTCGCCTAGCCTT        | GGTGATGTTTGTTTTTGGGG   |
| BoSF1125  | SSR | GCTGACCAGATGGAGAGCAT        | TCCATGTACTGCCTTTCACAA  |
| BoSF1126  | SSR | TCATGGGGAGGACAAAAGTC        | GCTGCTCTTTTTGTTGTGTGG  |
| BoSF1136  | SSR | ATGCAATCACACGGAATCAA        | CTTCGTCTTCTTCGTCACCA   |
| BoSF1144  | SSR | CCGCACCATCGAAAATAAAT        | TGGTGGTTTTTGCATTTTTG   |
| BoSF1161  | SSR | GACTTCATACAGCTGCCCGT        | CGAATTTTCTCCCAAACATCA  |
| BoSF1212a | SSR | TAAGGAAGCAATCCACCACC        | CTTTCCAATCCTTTCCCTC    |
| BoSF1212b | SSR | TAAGGAAGCAATCCACCACC        | CTTTCCAATCCTTTCCCTC    |
| BoSF1222  | SSR | CACTTGGACTACCGCTGTCA        | TAGAAACAACCTGGGACGGC   |
| BoSF1228  | SSR | TCTCTTTGAAAATGTGGCCC        | TATGTGGACGATCTTTTGCG   |
| BoSF1230  | SSR | GGAGAAAGTGGTGAGCTTCG        | ATTCTTTACACGACCGCCCT   |
| BoSF1254  | SSR | TGTGGGTGTAAGATATGCGTCT      | ATCTTCCCATAAGGCACACG   |
| BoSF1258  | SSR | AGGAGGAGGAAGAGCAGAGG        | GTGTGGTCGTCAATTTGTGC   |
| BoSF1264  | SSR | TTGTTATCTATATTTCCAAACAAACCT | TTGTTTGAATGGTTGTTGTT   |
| BoSF1270  | SSR | GCATTGATTGGATGATTCAAAA      | ACTGATCTCCTCACCCGTTG   |
| BoSF1271a | SSR | GGATGGCAGCTTTTTGTGTT        | AATTCTGATACGCAGGCACC   |
| BoSF1271b | SSR | GGATGGCAGCTTTTTGTGTT        | AATTCTGATACGCAGGCACC   |
| BoSF1276  | SSR | CCTTGCATCTCCTCTTCCTG        | ATGCAGCCACCTTCATATCC   |
| BoSF1319  | SSR | AGGAACGGTTGCTTACGAGA        | ATCCCTCAGCTCACTCCTCA   |
| BoSF1324  | SSR | CCAACACAGGTTACACCAACA       | TTGGAAGCCATGAAGACGTT   |
| BoSF1331a | SSR | ACTGGGCTGGCTGCTAAATA        | AGAAATGCGCGTTTTTAAGG   |

|          |     |                            |                            |
|----------|-----|----------------------------|----------------------------|
| BoSF1336 | SSR | TTTCATTCGGGAAGATCAAAA      | TCCGTAGCTATTTCCCTTGATTTCT  |
| BoSF1365 | SSR | CGCCTATAACATTAGTTGTCGC     | GGTGACCAATGAAATTGGAA       |
| BoSF1372 | SSR | CGCTGCCGGTAAAGTTTCTA       | CTGCAGGATTGCATTTAGCA       |
| BoSF1406 | SSR | TACCATGAGTGCAAAACCCA       | GGAAGCTGCTGGTTCAGTTC       |
| BoSF1414 | SSR | CCCCTATGCACATGGAAACT       | CGGTAAAGAATCTTCAAGCCC      |
| BoSF1425 | SSR | TTTTATGTTTCGGCACATGG       | CCCTGCGAGCCTACAATAAG       |
| BoSF1468 | SSR | TTGTTCTCCTTTGTTTCTGATCC    | CTTTGTTTCTGGGTTGAAGTTG     |
| BoSF1469 | SSR | AAAAACAAAAGCAAGGGGC        | GAGCCAAAACAGCAATCACA       |
| BoSF1476 | SSR | GCATATCACAGACCAGTCGC       | TTCCGTA CTCCGGTAGGAGG      |
| BoSF1481 | SSR | TTGCTATTGGCATAGCTTCTTG     | GGGAGTTGTTGAAGAAGGAGG      |
| BoSF1492 | SSR | CGTTGTGCTTTGTGAGCATT       | CCTCCATTTCCAATCGAATC       |
| BoSF1509 | SSR | GTGCGGTGGTCAAGTTTCT        | TGCGGCATTAGTTGTCAGTC       |
| BoSF1510 | SSR | TGACATTGACGCCATTAGGT       | GCCAGCTCAGTTTAATTCGG       |
| BoSF1521 | SSR | CACTCCAGATGTGTCGTTGG       | ATGAGATGGGAGGATGGTGA       |
| BoSF1522 | SSR | AGTTGCCTCCTCTGCAAGAC       | TCCCCAACTATCACGTCTCT       |
| BoSF1539 | SSR | TCATACCCGGATGCAATTCT       | TGAAGGATCCGTCTTTCCAC       |
| BoSF1555 | SSR | TGCCATCAACTGAGACGAAG       | GAGACGAGACTTCAACATTGTTTT   |
| BoSF1559 | SSR | GCCTGTTTATCTCACAAATACTTTCA | CTTGGGATTTTGACCAAAGG       |
| BoSF1597 | SSR | TTGCCAGCTTCAGACCAAG        | CGATTGGAAGATCTCAGAGGA      |
| BoSF1642 | SSR | ACCAGCAAGTTGGGATGAAC       | GGCTGTCTTCTCATTGATTCAG     |
| BoSF1647 | SSR | TAACCAACAACCTCCAATGA       | CAATCCGAGAACAAGATAAA       |
| BoSF1650 | SSR | CTATTCAGCTCCAAGCCCAG       | TCATCATTCCCTCCAACCTC       |
| BoSF1651 | SSR | TGGGATCCATTTTGTAGCC        | TCATTGGTTTATGATTTGTAGAGCA  |
| BoSF1659 | SSR | CGGTTTGTTCCTTGACGAAT       | CCATCAGCAACCTCTACTTGC      |
| BoSF1663 | SSR | TCTGAGGAATCGAAATTGGG       | GCGTACACTTGTCCGGTTGT       |
| BoSF1665 | SSR | TTGCTTCTCCATCCCTAAA        | CAAATCTTTTTAAATTCTTTGGATCT |
| BoSF1666 | SSR | CTGGCTCTGTCTCTTGAGGG       | CCAACCACAAAGGAGGAAGA       |
| BoSF1667 | SSR | TCACCCTATGCACCGTTAGA       | AACTCAAGCCGACAAAGAA        |
| BoSF1678 | SSR | CTTCTGTCTCTCCCTCATTC       | CGCTGTTATCCGACTCCA         |
| BoSF1692 | SSR | CAAGCTGCATCCATCCATTA       | ATGTCATGGAGCCCTCGTAG       |

|           |     |                        |                         |
|-----------|-----|------------------------|-------------------------|
| BoSF1704  | SSR | CGATCACTTGGATTCCGGTCT  | CGCGATTTTACGGAGAAGAG    |
| BoSF1709  | SSR | CGACACGGAGCTTTAAGGAG   | CGCGTCATCTACGCAAATA     |
| BoSF1714  | SSR | AAATTGCCGAAACCCTAAGC   | CGACGAAAACCCCTCTGTAA    |
| BoSF1715  | SSR | GATACACTCCGGGTCTGGAA   | GCAAAAGAGAGGCACGTTTC    |
| BoSF1722  | SSR | CACAGGGATCGAACTCCATAA  | CGGTTCCCTTAAAATATGGGTGA |
| BoSF1743  | SSR | GCAGTGATGACCACTCTTTTCA | GTTCCATATCGCTGGCGTAG    |
| BoSF1749  | SSR | AGCTTGAGAACCCTCCAACA   | AGACTCGCTCGGTGATGATT    |
| BoSF1752  | SSR | GAACCTGCAGCAGGACATGA   | ACTCAAACAGAACCGAACCG    |
| BoSF1779  | SSR | GGAGGGAGAGAGAGAGAGGG   | TAAACCGGTATTGGGTCGGT    |
| BoSF1788  | SSR | ACGGATGTGAGGAGATCAGG   | TGATGCTGTCCAGGTACCAA    |
| BoSF1799  | SSR | GTTCTCATTCGTCTTGGGGA   | CGTGAGGTCATCTCCATCCT    |
| BoSF1808  | SSR | CCTCTGTCCGCATATTTGGT   | CTCTTGGACATATCTCCGGC    |
| BoSF1810  | SSR | ACCCCTGTAAAAGAACGCA    | GTTCCGCCGAAAAACACAAAT   |
| BoSF1814  | SSR | TTGTGACTGTTACCTCGGCA   | TATGCATATGGGTTGCTTCG    |
| BoSF1817  | SSR | TGAAACAAACAAAGCCTGTGA  | TTGTTTTCCAACCTCTGGGG    |
| BoSF1825  | SSR | CGGTAATTGTTTTTGTGGCA   | CCCTGCCATTAGTGGAACA     |
| BoSF1826  | SSR | TGAGATGGTCCCTGAGAACC   | CCCTTTTCCCCTTCTATTGG    |
| BoSF1830  | SSR | CCGACATCGGAAGATTAGGA   | CCAACCTATTACTGGCGGAA    |
| BoSF1843  | SSR | TCTCCACGTTGTCCATCAA    | TTAATCAACGATGCTTGCG     |
| BoSF1852  | SSR | TTGGGAGAGCGAGAGTGAAT   | TGGCTGATTATTGACGAATTG   |
| BoSF1872  | SSR | CACTCAGAGGAGGAGGTTGC   | GCCACGTGTAGGCATGTAGA    |
| BoSF1885  | SSR | CCCAATGGGGTCTGTTTTAG   | GAACCATGTTGGGTCCTCTC    |
| BoSF1886  | SSR | TAACCCTCGGGTCACAATTT   | ATCTTGTCTTCATCGCACCC    |
| BoSF1902  | SSR | GCCAAAAACATGAGAGCACA   | GCGAAGAGCACAGATGATGA    |
| BoSF1911  | SSR | ATCCTCGGACAATCAAATCG   | CCCAACCAATTATAAAAACATGC |
| BoSF1918  | SSR | TACCCCTCTGCATCTTCCAG   | GGGGCTTGGTATACATTGGA    |
| BoSF1919  | SSR | AAACGCCCAAGGCTTCTTAC   | CGGTGTTGTGAAATGGTGTC    |
| BoSF1920a | SSR | CAGGCTCGAGACAATCCAAT   | ATGTGAGGGGTGGTTGTGTT    |
| BoSF1920b | SSR | CAGGCTCGAGACAATCCAAT   | ATGTGAGGGGTGGTTGTGTT    |
| BoSF1924  | SSR | ACCGTCAATCAGAAACGGTC   | CTAATTAACCACGGAGCCGA    |

|           |     |                             |                           |
|-----------|-----|-----------------------------|---------------------------|
| BoSF1926  | SSR | TGGCTTGCATTCAGCTAAGA        | CCTTCCTGTTTCAATCCTCG      |
| BoSF1937  | SSR | TCAAACGTTTTGCTGTTTGC        | AGATTGAAGCTATGCGGAGG      |
| BoSF1939  | SSR | AATCGAGTTCTTTCTCGCCA        | CGAGAGAGCAAACCAAGTCG      |
| BoSF1944  | SSR | TGTGATTCAAGAACAGCCCA        | CACACGCACACCTACGACTT      |
| BoSF1951  | SSR | GAAAGTGCCTTCCTTGCCT         | CCCTTTCACTATTTCCAGCA      |
| BoSF1969  | SSR | TGCAGATTGATGGGTGAAG         | CCCTAAGGTCGTTTTCATGC      |
| BoSF1970  | SSR | TGACCCAGCTATCGCACATA        | GGTTCTTCTTGCCGTCGTAG      |
| BoSF1972  | SSR | TTATCGACGCCGTCTTAACC        | TTGCTTTCAATAGGGGATGG      |
| BoSF1976  | SSR | TCGGGGAAAGCCTCTAACTT        | CCCTGGTCCAACCTTTAAT       |
| BoSF1977  | SSR | ACATGTACATAGGCCCCCAA        | ACGCCAACAAAGGAATCAAC      |
| BoSF1990  | SSR | AGGGGAAGGGAAATGAGAAA        | GCCTAGCGCTAAAGTGATCG      |
| BoSF1995a | SSR | ACCCCAAACCTATCCCAAAG        | ACTCAAACATGGCGGTTTC       |
| BoSF1998  | SSR | CCCCAGTACCAGTGATAGCG        | TTTTAGGATTGGAGGAGGCA      |
| BoSF2005  | SSR | GGAAACGTTGAGATGGGAAA        | CTGATCATCTCAGGCCACAA      |
| BoSF2006  | SSR | GGATTGGGGTGAGAAAGGTT        | ATATGCCGCAACACCTGAAT      |
| BoSF2018  | SSR | TTGCTCATTACGACGAATC         | GAAAACGTCCCTCCCTCTTT      |
| BoSF2019  | SSR | GCAACTCAACAGTTGGGAAAA       | TAGGCGCCAATGTTAATGCT      |
| BoSF2030  | SSR | GCTGCTTCAAGGAGGTTTCA        | CCATTGGAACCTGGGAATTA      |
| BoSF2040  | SSR | CCATCTTTTACGCCCTCTCA        | CCCGAAAGAGACAGTTTCCA      |
| BoSF2062  | SSR | CTCCTACCCCTCTAAACCGC        | GCCAATTACCCACACTTGCT      |
| BoSF2071  | SSR | GAAATGGAGTAAATATGTTACGGCTAA | TGCAGAGTGAAGTGGTGAGG      |
| BoSF2073  | SSR | TGACCAATTTTTATTTCCCCC       | CTTGGTCTAAGGCATCCGAA      |
| BoSF2100  | SSR | TCCCCTTTTCTTTCTTGCT         | ATGCTGAAACTCTCCCCCTT      |
| BoSF2104a | SSR | GACTTCCATCGAGCACCTTT        | ACTGGAAACTCTTCAGCGGT      |
| BoSF2106  | SSR | GAGTCATCGCAAGGCTCTTC        | TCACCCACCCACCTATCCTA      |
| BoSF2123  | SSR | TTCAAGATTCGGAGACCAGAA       | CTCCGAGCTTCCATCATCTC      |
| BoSF2131  | SSR | CCCAAAGCCTCCTTCTCTCT        | GAAAACGAAGAGGTGTCTATAAGAA |
| BoSF2132  | SSR | ATGCCTGGGAGATTAACGTG        | GGACAGCCTATCTGAGGCTTA     |
| BoSF2141  | SSR | GGATCCCGTTTCTGAACTGA        | TACATCGGCGGTTACAGTA       |
| BoSF2145  | SSR | TGGTAAATGTCTCGGCTTCC        | CGCAGGCTTCTGTATGTGAA      |

|           |     |                         |                           |
|-----------|-----|-------------------------|---------------------------|
| BoSF2163  | SSR | GGGTGGA ACTTCAACTCCAG   | ACATTTCCACGTCAACCCAT      |
| BoSF2181  | SSR | CGACAGCTGCATGAGGATT     | TCAGGAGATGGCTGTGAAGA      |
| BoSF2182  | SSR | CTCATGATGACTTGGCGTTG    | TGGAAAGGGAAGCATCAAAC      |
| BoSF2214  | SSR | TCGATTTACGTCTCTCACGG    | AGGAATGTGGTTGTGGCATT      |
| BoSF2220  | SSR | ATCTGAACATGGGGGATTGA    | TGACAACAAATCTTTTCAAGAGTCA |
| BoSF2224  | SSR | CCTACAGCAGTAACGGCTCC    | AATGACAGGTCCCCTCCTCT      |
| BoSF2233  | SSR | CGCAACCATGTGAAGAAGAA    | TCTACACTGAACCCGAAGGAA     |
| BoSF2242  | SSR | CGTTGTCTCAAATCAATGGC    | TCATCCATTATCATCGGGGT      |
| BoSF2253  | SSR | CGAAAGCAATAGCCTATATCCG  | GCATGCATGGTTACATTTTCA     |
| BoSF2257  | SSR | CGTGCGGAGTATTTCCATTT    | CAGAGCTCGCTTCTGGACTT      |
| BoSF2258  | SSR | TCGATTTGAACGGAATGGAT    | GGCCTAATGGGCTTCACATA      |
| BoSF2263  | SSR | TCCTATCCAACATGTTCCCTCC  | TCATCGATCTGCTTCTTTGTATG   |
| BoSF2269  | SSR | GAGCATCATTAACGCGGTCT    | CTTCATTTGCTGGGGATCAT      |
| BoSF2273  | SSR | CACGTAGACAAGAAGCGCAG    | TTTGTTCAATTTACTCCCGGC     |
| BoSF2274  | SSR | CTTCTTAGGTCGTTCCCTGCG   | AAACCCACCATAGATTCCC       |
| BoSF2277  | SSR | GAGAATCCAATCCGGACAGA    | CACGTTCAAGTTCCCTGATT      |
| BoSF2281  | SSR | CGATCTTCTCCTCTCTCTCAA   | TGTGACGATCAACCATTGCT      |
| BoSF2284  | SSR | CGAGATCAATAGGTAGCGGC    | ACGTGGTCTCAGATTTTGGG      |
| BoSF2290  | SSR | GCCTCCGATCAACAAGAAAA    | ACCAGCATGGTCAAGTCGTT      |
| BoSF2294  | SSR | ATCTCGAATCGCATTGATCC    | GCCCTCGTGTCAAATCCTTA      |
| BoSF2314  | SSR | CAGCTTCTGGTGATGCGTAA    | CCAAGAAAACAAACGGCTCT      |
| BoSF2316  | SSR | TTTTGAGTTCACAAGGGTTGC   | ACCTGAGCCTGAAGTCCAAA      |
| BoSF2324  | SSR | AGCTTCACTGCGAAGGAAAA    | TCTTTCCCATTTTCACAGCC      |
| BoSF2344  | SSR | CCTGAAACGAATCGGTGAAT    | AGCTCCGACCTTTCTCAACA      |
| BoSF2346  | SSR | TTAAGCCAAGCTTCCAAGA     | GGCTGTTGCGTATTACCGTT      |
| BoSF2347  | SSR | TGTTTGACGAGTGAGTTGGC    | TACAGGAGTGGGGATTGCTC      |
| BoSF2360  | SSR | GCAGGTGAGGATCGGAATAA    | ATTCCCGAGGAGAACTGTCA      |
| BoSF2378  | SSR | GAGGAAATGAGATCCATAGGTCA | GGAATGGAAATATTCTGAACTCC   |
| BoSF2392a | SSR | TGACCAATCCCTTATTGTGGA   | TGTTTTGATTAGCTTGTTCGATTG  |
| BoSF2392b | SSR | TGACCAATCCCTTATTGTGGA   | TGTTTTGATTAGCTTGTTCGATTG  |

|          |     |                          |                           |
|----------|-----|--------------------------|---------------------------|
| BoSF2393 | SSR | CTGGCCCCTATCATATCGAA     | GCCATGTCAAGGCAATTTCT      |
| BoSF2395 | SSR | GGTTTAATCTTTTAAGCCATAGCC | CAAGCAAAAGATGTGTCTGGA     |
| BoSF2398 | SSR | CTTTCACGCCTCGAGAGTTC     | GGACATGAAGCTCTGATCGAA     |
| BoSF2406 | SSR | AAGGAGGATCACGAGGAGGT     | CATGGTAGCATCGAAAGCCT      |
| BoSF2407 | SSR | CTAACAAGCAATCAACCGCA     | AGCTCTTCGACGGATTCAAA      |
| BoSF2475 | SSR | TTCCAAAATCAGCCAGCTTC     | AGATGGGCAACCAATCAATC      |
| BoSF2482 | SSR | GGTTTCTTGAGAATGCTCGG     | TTGGCAAATAGATGCTTTGAA     |
| BoSF2489 | SSR | GAGCAGCAGAACCAAAGGAC     | ATCATGACGATGACAAGCCA      |
| BoSF2499 | SSR | GAGGCTGGCTTTGTATGGAG     | TCAAACGATCCCTCAGGTC       |
| BoSF2506 | SSR | AATCTTTGGCCCTTCCCTAA     | TGCAAGACTTGGCTCAACAC      |
| BoSF2507 | SSR | GGGCGTATCAGGAAGAGTGA     | ATGTGTGCCTGGGAGAAAAT      |
| BoSF2508 | SSR | CGGTACGGCGAATAGAAAAA     | GTCCCCGATGAAACAGTGAT      |
| BoSF2509 | SSR | TCGTCGTCATTTCTCTGTCG     | CTGTAACGAAAGGCGGGTAA      |
| BoSF2510 | SSR | TGGCATTGAGTAGTGGCCT      | AGTGGCCACACTTCCATAG       |
| BoSF2513 | SSR | CATCGTGAACGTGCTCATCT     | AGGAAGTTCAGACCAAGCGA      |
| BoSF2538 | SSR | GTCCCTGTCAAACGACAAA      | GGAGCTAGGGCTTCGTTTTT      |
| BoSF2549 | SSR | ACGCTAGGCAAAGAGCAGAG     | ATGCTTAGGCTTGTTGGGTG      |
| BoSF2552 | SSR | GGTGCACACCAATGACTACG     | CATGAAATGCTGAGAGAAAAGG    |
| BoSF2575 | SSR | CTGCAACCGATTTGGAGTTT     | CGATCTGATTGATGTGTGGC      |
| BoSF2578 | SSR | ACAATGGTGGGAGTGGAGAA     | GAACAAGTCGCATTGTTTATTGA   |
| BoSF2583 | SSR | CTTCTTGCTTTGGCCTTTTG     | GTGTTTGCGTGTTGGACATC      |
| BoSF2591 | SSR | CCAAAGGTGTCACGCATGTA     | TAATTCGGCCTCTGTGTTCC      |
| BoSF2604 | SSR | CGAGAATCTCATCTGGCTCC     | TGCATGACTAATGCTTCGGA      |
| BoSF2607 | SSR | TTTTCGTGAAGCTGATGCTG     | CCAGCTTTCTTTAAAATCCCAA    |
| BoSF2609 | SSR | CTTCTCCAACAAAAGCTCGG     | AGAGGACTGGTCCCCAAAGT      |
| BoSF2616 | SSR | GCACTGTCCATCTGCAACAT     | CCAGTCTTGGACATGCGTTA      |
| BoSF2624 | SSR | AAAAGCGAAATGAACCAACG     | TCTTCGAGAGGAGAATAAGAGTTGA |
| BoSF2646 | SSR | GCAACATACCATTTTTGGGG     | ATCTCCTTTCCAGCGAGTCA      |
| BoSF2653 | SSR | ATATGGCCCTGCAAACAGAG     | CAGCTTATGGAATGCCCT        |
| BoSF2657 | SSR | CAAAAGGCAAAGACCGAGAG     | CCACTGACCTTGGATGTGTG      |

|           |     |                       |                       |
|-----------|-----|-----------------------|-----------------------|
| BoSF2666  | SSR | CCTCGATGAGACGCAATTTT  | CATTCAAGG TTCAGCTCCTG |
| BoSF2669  | SSR | CGAGTTGGAGCCTACTTTGG  | ACAAGCAGTGCTGCAAACAA  |
| BoSF2670  | SSR | AACGCAGAATCAGGCAAAC   | TTAGGAGTGAGCTCGGGAAG  |
| BoSF2672  | SSR | GGTCCGAGTTCCAACACAGT  | CAAGGGGGTTTTGATTCTT   |
| BoSF2676  | SSR | TGGGAGAAACATGGGAAGAG  | CGCAGCTTGTTCTCTCAAAA  |
| BoSF2702  | SSR | CTTTGGCAGAATGTGGGAAT  | GGTCTTAGCGCAGAGGACAA  |
| BoSF2703  | SSR | GGATCTAGGACACAAGCAGCA | TGAATCCTCCTACACCGTCC  |
| BoSF2709  | SSR | TCGTCTGGAGGAAACAACAA  | AAGCGTACGTGGACCATTTC  |
| BoSF2710  | SSR | TAGAACGCAAACCAGTTCCC  | CAGAGGCATTGGATGTGTTG  |
| BoSF2723a | SSR | CGCACTAGTGACCTCGATGA  | AGCTTCAAGTTCAACGGTTTG |
| BoSF2723b | SSR | CGCACTAGTGACCTCGATGA  | AGCTTCAAGTTCAACGGTTTG |
| BoSF2740  | SSR | GTTTGCGCCAATAGTGTTT   | TTTGCGAATCTGTACTTGTCG |
| BoSF2744  | SSR | TCACAAGCAACGAGAACTGC  | CTGGCTTGCTTCACTTTCCT  |
| BoSF2746  | SSR | GGCGAGAGAAAGAGAGATCA  | AACGCAACTCAAAGATGGG   |
| BoSF2748  | SSR | TGTTACCCGCATGAATGAAA  | ACAATCAGATGGAAACCCCA  |
| BoSF2751  | SSR | TCCATGACTCTCGTGCTGTC  | TGTGTGACGAATTCACTGGG  |
| BoSF2754  | SSR | GGCAAATCACTTCGCAAAT   | CAGACCTCGAAAAGGCTTG   |
| BoSF2769  | SSR | CGGCCTAGACACCTCTTCTG  | GAAAACGGCGATTAGTTTCA  |
| BoSF2770  | SSR | TCACCCTGTGAAAAATGCAA  | GGAAACAGCCACTTCACCAT  |
| BoSF2771  | SSR | TTCAATCGCCATTGTTCAA   | TTGGGAGGATAAGAACGACG  |
| BoSF2774  | SSR | GTGATGAGAAGCTAAGGGCG  | TTTTGGGAAGTTCCTCTGGA  |
| BoSF2788  | SSR | TCCAGAGCAGCGTATAGCAA  | CCAAAAACACGGAGAAAGGA  |
| BoSF2791  | SSR | GGA ACTCAACGAGGAAAACG | AGAAGCTTTGCTTTGCTTGC  |
| BoSF2807  | SSR | TCGGTAAACCAATCCCAAAA  | GAAGGAGCTGAGCAAGGAGA  |
| BoSF2820  | SSR | GTTGCGATACGGAAGGAAAA  | CAGAGTCCGTTCCCCTATGA  |
| BoSF2821  | SSR | AGTGCGTTCTCCTCGTTGTT  | CGCCAATTCGTTAGGGAGTA  |
| BoSF2828  | SSR | GGCGTTGATGTTGCTCAGTA  | TACACACCATTCCTCCCAT   |
| BoSF2838  | SSR | GGGACGCAAATTTACGCTA   | CTTGCCGTGACCCAATAAGT  |
| BoSF2852  | SSR | TGCCTCATAGTTCAGGTCCC  | CAGGAAACCTCACGGATGAT  |
| BoSF2861  | SSR | GCTCGTTGTT CAGCTCCTTC | CCATGATGCGTCTGGAGTAA  |

|           |     |                            |                            |
|-----------|-----|----------------------------|----------------------------|
| BoSF2872  | SSR | GAACCCAAGGAAACATGCAC       | TCAGAGTGTCTCTGCCTCA        |
| BoSF2884  | SSR | CACTCCTACCACCTCGCTTC       | GATTCCTCCTGCAAGTTTGG       |
| BoSF2915  | SSR | GTTGCAGCTTCAGCCATTTT       | GAGCGCAATTCTCTGAAACC       |
| BrSF0006  | SSR | CATCGCTAATCAGAAAATTAGTGAAA | CGTTGGTAAGATGGGCTAACA      |
| BrSF0009  | SSR | AACCATATCAAAGCATGGC        | GAGTAGAATGAAATACTTTGTTCGGC |
| BrSF0010  | SSR | AAACGGGAAATTTAAGCGGA       | GCTTCCCGGAAAGTCTTCTT       |
| BrSF0016  | SSR | CGCAACGAACTCTGTCTTCA       | ACACTGCCTCAAGCGAATCT       |
| BrSF0019  | SSR | GACTTTTGTCCCTTTCCCAA       | TAAGCACAAACCACACCCAA       |
| BrSF0029  | SSR | TAGGGTTTAAGGTTGTGGCG       | CCAAACTAACCGAAACCGAA       |
| BrSF0031  | SSR | GCTGGCAATTTATAATTATCTTGAA  | TTCCGAAATTATCGCAATGAG      |
| BrSF0032  | SSR | TGGGGCTTCCAATTTTCTAA       | TGGATGTCTCGTCCAAGATGAA     |
| BrSF0040  | SSR | CAAGTTGGTCGAACGTGTGT       | GTGATCGAACCGGTGGTTAT       |
| BrSF0045  | SSR | TCGTATGGCTAAACCAAAATGT     | TTTTTCTCTTTTTAGCATTATCCCA  |
| BrSF0049  | SSR | CGTTGCAATGTTTTTCTTTTAAT    | GCTGCGTTCACGTACCCTTA       |
| BrSF0051  | SSR | CATTGATGAAACTTGGGACTAGAA   | CAATCAACATAAATAACTCCATTG   |
| BrSF0052  | SSR | GTGAAGTGAGGTTTTGGGGA       | AGTGGCATACCATAGACGGG       |
| BrSF0053  | SSR | TGACTCAATCTAACATCATGGAA    | TCATCATGCAGGTATGTGGG       |
| BrSF0056  | SSR | TTTGATTCATCCTATTTGCTTGTA   | AACAAAAATGGAACAAGGATAACA   |
| BrSF0062  | SSR | ACGGCTCACAGTTTGCTCTT       | TCACCTTGGTTTACAGAGTCCA     |
| BrSF0065a | SSR | ACGGATTTATGCAATTCGGA       | CCAAACAATATAAATTTTGAACACC  |
| BrSF0065b | SSR | ACGGATTTATGCAATTCGGA       | CCAAACAATATAAATTTTGAACACC  |
| BrSF0078  | SSR | TTTCACATGTTTTCTTGGTCATC    | CAGCGAAGAACGGAGAAGAG       |
| BrSF0087a | SSR | TGTTTTTCCAGTAAATTGCC       | AGTTGAAGGGAAAGAGGGGA       |
| BrSF0089  | SSR | CAACATTATTTTGACCCCA        | CCTAGCTTTAACTCGGCTTCA      |
| BrSF0090  | SSR | AAAAACCAGCACAACGGAAC       | AGGGAGGGATCAAGAGGATG       |
| BrSF0091  | SSR | TCAGCCAGAAACCTCCATC        | CCAAGGCCAAGCTGATAAAG       |
| BrSF0092  | SSR | TTTCCAGGGTGAAAGAAACC       | ATATGCTCTCCGTCGGTTT        |
| BrSF0102  | SSR | TAAATCTCCATGTGGTGGCA       | CTTTCTTTGGTCGGGGTTTT       |
| BrSF0112  | SSR | TTCCACCCCTTGATCAACAT       | CCTCAAAGGAAGAATGGGGT       |
| BrSF0114  | SSR | CACCACGAGATACAAGCAAA       | TTGTTACAACAAGATGCAAATAATCA |

|          |     |                             |                             |
|----------|-----|-----------------------------|-----------------------------|
| BrSF0120 | SSR | CAACTTCGGGGAAATTTGAA        | CATTGTCCAAATGAAAGAAAACA     |
| BrSF0144 | SSR | CAATGAATGTGATGTTATCCGA      | AAGATGTGAGGGTAAGTTTGTGG     |
| BrSF0149 | SSR | AGAGAGTGGGATCGATGGTG        | TTTCTGGATCCGCAAATAA         |
| BrSF0153 | SSR | GATGTTCATTCCGTGCAAGA        | GTGGATTAATAGCCCGACCA        |
| BrSF0154 | SSR | CGGGTGGACCTAAATAGCAT        | AACTGCTTTGAAAGTTAATATTTGGA  |
| BrSF0162 | SSR | AACCATGTAGTTCAGAAAGCACA     | GTTAGAAATGCGCCGTCAAT        |
| BrSF0166 | SSR | GATGGAAAGTAGCTCCTGCG        | AAGCAGAATTTGGGCCTTTT        |
| BrSF0171 | SSR | AATCACCGGCGTTGTTTTT         | GCGGATCTCGTTGATGTTCT        |
| BrSF0185 | SSR | ATTGCACGCATCCACATAAA        | TTCAAAGGATAAGGGCATCG        |
| BrSF0193 | SSR | TTGAAATTGTCCAAAACACTTGA     | TGGATTTGAATAATACATGCCAA     |
| BrSF0210 | SSR | TCAAGCTTCAGCCCTTAAAAA       | TGCCTTCATAAACACGCAA         |
| BrSF0214 | SSR | CGTATAATTTTCATAGGCGACG      | AGCATGCTTATGACTCTGGGA       |
| BrSF0229 | SSR | AAAAACATAAAGACAACCTTGATGAC  | GAGATTTTGACAAACGACTTGAAA    |
| BrSF0250 | SSR | ATTTGCAACGGTCAAAACAA        | CCATGTGAGAAAACCATCTCC       |
| BrSF0251 | SSR | GACCGCCACCAGATCTTAAA        | TCAACTTGACATGTTCACTAATAGTTT |
| BrSF0255 | SSR | CAAGTTTTTCGTGGAATGGAA       | CAAAGATACAAATGACAATAAAACCA  |
| BrSF0261 | SSR | TGATGGGTCTGAATTGGGTT        | TCCTCGTCGATATGGTGACA        |
| BrSF0279 | SSR | AAATTCAATGGTTAAAGTCAATGTT   | CATATGCGGGCTTAATCGTT        |
| BrSF0283 | SSR | CTTGTCTCTTGTAACCTGCCCA      | TGAGAACATCTGACCCACCA        |
| BrSF0287 | SSR | TGACAAACTTGTAGATAATTTCCAGTG | GAGATTATAACTTTTCCAATGTGTGC  |
| BrSF0295 | SSR | TCGTGATGACTACGGAACCA        | CCAAAGTACAACATGATTTTAAGGA   |
| BrSF0299 | SSR | AAGACAATGTGGGCAGAGAA        | TCTTGAGGAGTGTGTGTGTGTG      |
| BrSF0300 | SSR | CCTTCTGCGTTGCTTCTTCT        | ACTTTCGTTTCTGGGGTCCT        |
| BrSF0313 | SSR | TGAGTCAAATTGGGTGACGA        | TCTGGTCAAAGAGATTGCAACTAA    |
| BrSF0331 | SSR | TCTTCTCCGATTGGTTTTGC        | TTTAGAGGCAATCCGTTGG         |
| BrSF0350 | SSR | TCAAAGTATTGATTTAGTTTGATTGAA | ACGGAGGACGTTGACAAATC        |
| BrSF0353 | SSR | TTGACATTGGAGAATTGGCA        | ACAAGTACGTGGCTCAAGG         |
| BrSF0356 | SSR | ATGGCGAAGATAACGTTTGG        | TAGGGATGGTGGGGAACATA        |
| BrSF0369 | SSR | TGAGGAAGATGATTGAGGGG        | ACCCAAGTATACCAACGCCA        |
| BrSF0383 | SSR | ACCAAACCAAACCAAACCAA        | CGATCTTTTGGTGGAAAGGAA       |

|           |     |                           |                             |
|-----------|-----|---------------------------|-----------------------------|
| BrSF0385  | SSR | ACCAGAAGACGATTCCAAGC      | GCGAAGACTGACACGACTTG        |
| BrSF0389a | SSR | AGGGACTCAGTGCTTCCTCA      | AACGATCTCGGTGGTGGTAG        |
| BrSF0403  | SSR | TTCCCCATATATCACGCCAT      | TAGATCAACGGCCATGATGA        |
| BrSF0415  | SSR | TTTTCTTTCCATTACAGCAGA     | GAGAAAATCACGGAAGAAAATCC     |
| BrSF0422  | SSR | GGATCTAGAAACCCCTTCACAA    | TGATCGAGATCGAGACCCTT        |
| BrSF0425a | SSR | CTGACCCCACTACTTTCCCA      | CAGAGATGAGAGACCGCACA        |
| BrSF0425b | SSR | CTGACCCCACTACTTTCCCA      | CAGAGATGAGAGACCGCACA        |
| BrSF0427  | SSR | TGCGTGGAATTGATCTGAAA      | ACAGCCTGACCGTAACAACC        |
| BrSF0436a | SSR | TTGTTTGAAGTGAGAAAGAAATCAA | TGCTAAGCTAAGAGTGAGCATGA     |
| BrSF0436b | SSR | TTGTTTGAAGTGAGAAAGAAATCAA | TGCTAAGCTAAGAGTGAGCATGA     |
| BrSF0446  | SSR | CCGGGTATAGATCGGGTTTT      | GAGAAGAGAAGTGATGCGGC        |
| BrSF0472  | SSR | AGGCCCTCTCTGTCCATTCT      | CCTCCGGTGTCCATAACAAC        |
| BrSF0480  | SSR | TTCTGTCCAGCTGCAATCAC      | AGCATCACTAGCTTCGCCAT        |
| BrSF0491  | SSR | GCAACCACAAAATATCGAAAA     | TCATGGCTCTCACGTTTCAG        |
| BrSF0497  | SSR | CCGCCGACAGTTTCATATTT      | AGTTCTAAACCATGCCCCCT        |
| BrSF0503  | SSR | GATTCGAGTCCCCATGTCAC      | CACTTGGAGTGTGCAGCTTT        |
| BrSF0519  | SSR | ATATGAGCCACACGTCAGCA      | TGTTGATGTACACTTACAGCTAATTTT |
| BrSF0520  | SSR | GCTGCATCATAAACACATGA      | GAAAATTGAATGCAAATTCAGA      |
| BrSF0549a | SSR | GCTACTCATCTCCGGCTCAC      | GTCCACCTCGTCACTACCGT        |
| BrSF0550  | SSR | TGGCAATCTTCTGCTCTTGA      | AATGGCTCATTTTCCTGTGG        |
| BrSF0552  | SSR | ACCCAActCTAACGTGTGGC      | AAAGCAGCAACCAAGCAAAT        |
| BrSF0560  | SSR | GCCAAAAGAGAAAGCGAATG      | GAAGATCTGGTGCGGAAGAG        |
| BrSF0564  | SSR | CGGCAGCTTGTTAAGGCTAC      | GCCTTGTTCATCCTCCATA         |
| BrSF0570  | SSR | TTGACGGTTTACCGGATTTT      | GAGCACCATTGCCAATTTTT        |
| BrSF0606  | SSR | TCGGGCAACTAAAAGGCTTA      | TGGGGAGCTATCATCTTTGT        |
| BrSF0615b | SSR | GAAGAGCAGGAAGTTTTGGC      | TCTTTTTTCGACAGCATATTGAGA    |
| BrSF0618  | SSR | TTGCGTATAAAAACGTGCCTG     | CCGTGCTGATCAATCAAAGA        |
| BrSF0620  | SSR | AAATCCCGCATTTTTACACG      | TTGTATTCGTTTCAACTTTTAAGCA   |
| BrSF0642a | SSR | ACGTGGACTGGGAAAAGATG      | CACCTGTTCCCCAAAAGAGA        |
| BrSF0643  | SSR | ATGCTTTGTGTTGCCTGTTG      | AATGCGAATGTCATATGGTGA       |

|          |     |                             |                           |
|----------|-----|-----------------------------|---------------------------|
| BrSF0645 | SSR | TGGGTTAGTCAAAAAGGGGC        | CATCCTTCCCAAGTCCTAACA     |
| BrSF0646 | SSR | ATAACCAGCGGTGCCAATAC        | GGAGAAAGAATGGCATCGAG      |
| BrSF0661 | SSR | CCCCTGCAATTTGTAACCAC        | CCCTTTTGAACAAGGTACGC      |
| BrSF0663 | SSR | ACCGAAACATGTGGCTCCTA        | CGAGAAACATCATCCAATTCA     |
| BrSF0665 | SSR | CGCCATGACTTGCTGTTAGA        | CCATAAATAGAGGGACGCGA      |
| BrSF0679 | SSR | ATCCAACGGCTACCCTTCTT        | ATCTCTCCGGCCAAATCTTC      |
| BrSF0680 | SSR | TTTTACAACCGTGCACACAAA       | AAATCCGATCCCCAACATCT      |
| BrSF0682 | SSR | TGCTAATGCTCCCGTATTCA        | CGGTTTTCTCTCTTCTCGTC      |
| BrSF0689 | SSR | TTGCCATTTTGAACATTAGGAA      | TGAGCCTCTCTGAGTCTCGAA     |
| BrSF0695 | SSR | CATCATGTGCCTTGTCGAAC        | ATTAAACCCCCACCCAAAGA      |
| BrSF0696 | SSR | GAATGATTTTCAATTTTGTAGGTTTCA | TGATTGACCGACTGATTCAA      |
| BrSF0702 | SSR | TGCCTTGTGCTCCATAAACA        | ACGCAAGCCAAAAGAAGAA       |
| BrSF0703 | SSR | TGCACCACACATAGCAAACA        | TGAGTTGTGGGAATGCAAAA      |
| BrSF0705 | SSR | TGAAAACACTGCGATTGAGC        | TGTCAAATCAGACAGCCTGG      |
| BrSF0706 | SSR | CGAGGGAAATACCCATACCA        | GAGAAGATGTTCCCGAGGTG      |
| BrSF0708 | SSR | GATTTCTCAGAGCCGAGCTG        | CTCTAACGTCTAGGGGCACG      |
| BrSF0712 | SSR | CCCACTGAGAAAATGAAGGAA       | CGTTTCCAAGCCAAATGTT       |
| BrSF0719 | SSR | CGCCGTGGATACTTCATTTT        | CTTCCACGCACTGTAAAGCA      |
| BrSF0726 | SSR | AATCGTCAATGATCATCGGTT       | ATGCACACGCATTATCCAAA      |
| BrSF0741 | SSR | CGTCTCGAAGAAGCAAAGG         | AGATTCCCTCCGGTGATGTTG     |
| BrSF0743 | SSR | TCACGTCATCTCCATCATCAA       | TGGCATGATTACCAATGACTG     |
| BrSF0750 | SSR | GGGAGAAGGAAGAGCAAAGA        | TCGTGCTAAAATGAAATTGA      |
| BrSF0754 | SSR | GCAAATCAAGCAAGGTTGAAG       | TCAACTTTTTATGAATCCTTCTTTG |
| BrSF0755 | SSR | CTTCAAGAAACGATATCGGGA       | GGTTTCAATTCGTCGGAAAT      |
| BrSF0784 | SSR | TTGGGGACTTGTCACATCAG        | GGACCCGTGGATAAAAGGAT      |
| BrSF0789 | SSR | TGGTTATTTTCATGGTGGCCT       | AACCTCAAAGTCAAACCTTTTT    |
| BrSF0811 | SSR | AAAAGGAAGGGCAAAGTGGT        | TTTTGCCATTTCGTGTCGTAA     |
| BrSF0819 | SSR | CGAAATTAATCGTACATGCATAA     | TTTGTGAAACAAAACGAGCG      |
| BrSF0820 | SSR | TGGGTTTGTGAAAATATGGTGA      | TGTAAAGTTGTGCAAGGATTGTG   |
| BrSF0821 | SSR | GATGCGCTCACAATTCTTCA        | CCTATTGACCCACACCACT       |

|             |     |                             |                             |
|-------------|-----|-----------------------------|-----------------------------|
| BrSF0822    | SSR | GGGCAGGCTAACCCCTAGTA        | GAAGACGACGACATCGGTTA        |
| BrSF0836    | SSR | AATCGTCGAGTTTCACCGTC        | CTTCCCTGAGACAAGCGAAC        |
| BrSF0845a   | SSR | CACCAGAGAGAACGCAATCA        | TGCTCCTGATGCATTAACCA        |
| BrSF0845b   | SSR | CACCAGAGAGAACGCAATCA        | TGCTCCTGATGCATTAACCA        |
| BrSF0849    | SSR | TTGCTCTTTGAGGGTTTTGG        | CGCCTCTTTGCCCTAAAGTA        |
| BrSF0858a   | SSR | CGAAGTTCTCCGGTAACCAA        | CTTCGAACTCGACCAGAAGG        |
| BrSF0858b   | SSR | CGAAGTTCTCCGGTAACCAA        | CTTCGAACTCGACCAGAAGG        |
| BrSF0860    | SSR | GATGCCAGTACATGACGACG        | ATTCCCCACATTTTCCATCA        |
| BrSF0869    | SSR | TTCACTGCTCGTGTAATCGC        | TTTGGTGGTGTGCTTGTGT         |
| BrSF0898a   | SSR | CCAACAACGTTTCGTGTTCAA       | TTTACCGTACCGGAATCCAA        |
| BrSF0916a   | SSR | CGGGTCCATGGTCTATAACTTC      | CCCACACACAGAGTCCCCTA        |
| BrSF0918    | SSR | GGGTGAATCTCAGTCAGGGA        | CCCTCGTTCACGACTTCTCT        |
| BrSF0942    | SSR | TGACATTCGCATCAGATTTGT       | TTCTCCATCGTCTTTGTCC         |
| BrSF0949    | SSR | GCATCAAACGCACACCAATA        | TCTGCCCTGTCTCTCTGTT         |
| BrSF0952    | SSR | TTGGTTCAAATTATTTTAAATGGAAG  | AAACCCAGATTTTCATCATTTT      |
| BrSF0958    | SSR | TGCGCAACTAGATAGAGCATGT      | CACCATGACCCTCCTGATTT        |
| BrSF0969    | SSR | CAGAAAAACACGTTTTGGCA        | AATTTGGGATCGGTTTAGGG        |
| BrSF0972    | SSR | AATGGCGACGATTCTGTTTC        | TCATTATTTTGGATAATTTAGACCCTT |
| BrSF0973    | SSR | ACGCAGCTTACAGTCGTGTG        | TCCAAGCAGTTTCTTTGCAT        |
| BrSF0975a   | SSR | TGGTTTTCTCTTTTCATTTCTTTCTAT | TTTGAAAATGTTGAAAAGAAGTTG    |
| BrSF0982    | SSR | GAGACCGTGTGTCCTCTCGT        | GGTGGAAACAATAAAGGCCA        |
| BrSF0998    | SSR | GTGATTGGTTGGCACATGAC        | GTGATGGTACGGCTTAGGCT        |
| BrSF1002    | SSR | TTTTCAATGTGAGATTTCTTTCAA    | AAGATGCAAATGATCATAAAATCG    |
| BrSF1008    | SSR | TCCCGTCAGATAGTGTTCTTTT      | TTGGTTTATATCTTTTTGGCTTATGA  |
| BrSF1031b   | SSR | AGAAGACTCGAAGGGGAAGG        | CAAACCTCAACCACGAACCT        |
| BrSF1032    | SSR | CCGCGTTTCTGAACCTAAAA        | GCAAAATATGCCGGACTCAC        |
| BrSF1044    | SSR | TCAAACGATTACCAATCTAAAAACA   | TCAAATTAATATGTTGGATGGCA     |
| BrSF1049    | SSR | AACTCAGTAAACCCCAAAAATAAA    | TTTCCTATGCTCATGCAAAGA       |
| BrSF46-167  | SSR | TCGGCTAGAATGGCTACAAGA       | TGCCCATTCGTGTATGTTTG        |
| BrSF46-176a | SSR | ATCACCATTGTGTTATTTCTTCAG    | GGATCAAATGGATTTAGCGG        |

|             |     |                                     |                                      |
|-------------|-----|-------------------------------------|--------------------------------------|
| BrSF46-176b | SSR | ATCACCATTGTGTTATTTCTTCAG            | GGATCAAATGGATTTAGCGG                 |
| BrSF46-177  | SSR | AGCTGGTACATGATTGCGTG                | CAACTCTGCCATTCACATGC                 |
| BrSF46-186  | SSR | GCCAAAGTGCATCCCATCTA                | CCTTTGGAAAGTCGAGAGACC                |
| BrSF46-22   | SSR | TCGTGTAAGTGAGAGGAGAGTAAAGA          | AGCTGGTGCAGTATGTCAGC                 |
| BrSF46-238  | SSR | TTGCGAGATTATTTTTAGATATGTGC          | GAAAGCGTGAATCAAAAACG                 |
| BrSF46-291  | SSR | CCACGTCTGAGGTGAGGTTT                | CTTTTCTTCAATGCCACCGT                 |
| BrSF46-306  | SSR | ATGATCATGTGGACCGTTGA                | TGATTGTTATTCCCAACTTTTTAGG            |
| BrSF47-10   | SSR | ATCAATTTTTCCGAGACCCC                | AAGCTGGTGAACCTCGTTTCG                |
| BrSF47-234  | SSR | CGGTTTCATGTTTTGATTGG                | TATGGGATGTCCGAAGGTGT                 |
| BrSF47-277  | SSR | TGATGACACGTGACTACACTCAA             | ATCCAGGCGAAACATCGTAT                 |
| BrSF47-382a | SSR | GACTGTTGTTCTTCCTCGGG                | TCCACAGCGAGAGATACACG                 |
| BrSF47-389  | SSR | AAGAGGAGCATCATGGGTGT                | CACGGTTGATAATAACGCGA                 |
| BrSF47-54   | SSR | GAGTTGAAACCCCAAGCAAG                | GCGAAACAGAGGCAATAAGG                 |
| BrSF53-712  | SSR | ACCCCATGGGGTCACAATTA                | ACCATGAGGAGGCAGAGAGA                 |
| BrSF54-590  | SSR | ACGGACGTCTTCTCCTCTGA                | AACGGGATGGAATGTTATGG                 |
| BrSF6-104   | SSR | AAGATCTCTCAAATGTACGCCA              | TCTCAAACCGAAGACAAAACAA               |
| BrSF6-2245  | SSR | GAGGAAAGAGTTGCCGTTTG                | CTGCTCTCAAACCACTGCAC                 |
| BrSF6-2380  | SSR | TCACCAGCTCAACTGTTTGG                | AACGTTCAAGCGGAATTGTC                 |
| BrSF6-2389  | SSR | TCAACTTGACATGTTCACTAATAGTTT         | CAATAGACACGGAAATGGGC                 |
| BrSF6-2413  | SSR | TTTGCTTGGAATCAAATTCCTT              | AGCTTCAAATCAGCGGAGAA                 |
| BrSF6-2562  | SSR | TGTTTCCCCTATATATTTATTTGTGGT         | TCAAATAACAACCCATTCCA                 |
| BrSF77-118  | SSR | CACTCTCCCGCTGTAGGAAG                | GAAACCAAAGCAATCCATCAA                |
| BrSF82-562  | SSR | GCGAGATCCAACCAAAAACA                | GTGGCCAGGTTTAAAATCA                  |
| ns027b      | SNP | CTTGCTGTGAGTTTGTGGGTCCGA            | CGCCGCTGCTCCAACGCTAG                 |
| ns033       | SNP | CGCTGCATCACCCCGCATCA                | TGACCCTGCTCCAGCCTAGTCTCAA            |
| ns059       | SNP | CACGGAAGGCAGACGCGGAG                | AGAGATTCTTACCACAGATGTGACAGGTACGC     |
| ns067       | SNP | ACACGTGCAAAACGAGTTACTATAATAGTTTTATG | ACAGTTTTTGGATTGGAAGAAAGAAGATAAAAATGG |
| ns085       | SNP | GGTGTTTGAACAGTCTGCATTTTCAGGAG       | CGGTTTAAAATTTTGGTTAATTCGGTTAGTTCAGTT |
| ns104       | SNP | TCCTGCTTCCTTACAGCCTCAGTGTTACC       | ATGGAAATCAGAGCAAAAACAGAACTTTGGT      |
| ns120       | SNP | CTTCAGTCATTGCAGCTTATTTCTCTGATATGTTC | TGAAGAACAGGTTATAGCCTTAGCGATAGGAGTTT  |

|       |     |                                      |                                      |
|-------|-----|--------------------------------------|--------------------------------------|
| ns123 | SNP | ATCAAAATCCCAAATTAACCCAAAATATTCTCCAGA | AAACCGGTTTAGGCCTTTTCCCTCC            |
| ns126 | SNP | CAGATTCAGGCAATATGGATTATGGCATC        | GTGTGTAGAGTCCGACCCGGTTCAA            |
| ns155 | SNP | CTCTAAACCGTTCAGAATAGCGTCGAGATATCTT   | ACGATGGGGAACGTCGACAACG               |
| ns156 | SNP | ACTAAGCTTCACTAGGTAAATCTAATCTATGTGGGT | GAATCACGCGAGTGAAGAAGCTGCTAAG         |
| ns158 | SNP | AAAGCACGAACGTCAAAGCCGTTCTT           | TGGTGCTAGAAAGCAACCGTCTTTCCG          |
| ns160 | SNP | CACTTCTTTTTGTGGGTTGTTAAATTGCTTCC     | AAACACCATTTTACCTTCTCCTCCCTTGTTAAG    |
| ns161 | SNP | CCACCCTTTCATCAGTGACATGACCG           | AGTTTCCATCGGTAACCCTAATGGTTTGTTT      |
| ns162 | SNP | GCATTCGTTGAACTTGCTTTGAGATGTATTAGC    | GCTGCGACATCATTTTTAAGAGATCCTCTGT      |
| ns163 | SNP | CCGGAAGGCTCGCAAATGCTC                | GCCACCGTTCCTGATCCCAT                 |
| ns164 | SNP | CAAATCCTTAACAGAAAACCAAACCGGAGTTT     | TAACGGCGACGACGGTTGACG                |
| ns165 | SNP | CATGAGAGAGAATAACTGAGAACTGCAACCAT     | TTCCCCTTGGATCCACAGATGGC              |
| ns166 | SNP | TGCAACTAACTCATCAGCACTTAAGACTGGC      | TTCCCCTTGGATCCACAGATGGC              |
| ns167 | SNP | CATCAGCACTTAAGACTAGCGACTGCTGATAAC    | AACTTGACGAGGACGGGTGAGATAATGAG        |
| ns168 | SNP | CACACTAATGCACAATCATGTAACGCAGGAT      | TTGAATTATTTGGGAGCGCTGGATGA           |
| ns211 | SNP | GCAAAGGCCTCTTCTGCAACTGTTACT          | GGTTGGGTGAGTTGATATTGTTTTATCTGATCTGT  |
| ns213 | SNP | GCTGCACCATGGAGGTCTGATGTAGATAGT       | GCTCCAACAAGTCCAGACAGGGTCC            |
| ns218 | SNP | TCTTCACTTGGGACCAAACAAATGGAAT         | GAAACTTACCGCTACTGTTGCGTGAGGA         |
| ns231 | SNP | CCAAAGTTAATCAAATCATGCCTTGTGTATTTAACT | AAATTGAACGCTTTGAGGATTTGGTTACCTACTAG  |
| ns258 | SNP | AACCTTAGCCTAGCAAGCACAATAGAGATGAAAT   | GCTTCAGTATGGGTAGATTCAATCGATATCTTTGTT |
| ns262 | SNP | CAGTGTTTTAACAAGCGAAAGGACGCAAATT      | TTACCATAACCAGCCTTCACCATTCCCTGA       |
| ns314 | SNP | ATCGATCAAACCTACAAGGAGTTGCTAATTCCAGT  | AACATATGGGCTTACACAGAGCATGGTTAATATACA |
| ns326 | SNP | GAGTCCAGCCCGAATGTTTCAGAACT           | CAACAGCTTCACCTGACGCAGAACC            |
| ns337 | SNP | TGCATTACAGTTGCTCATCTGCGCTTAAT        | TGACTAAAGCTCTCTATGGTCTTAAACAGGCTCC   |
| ns347 | SNP | CCATATCACGTGCCGTTGAAGCAAAT           | CTTGGCTTGCTCAGTTACAGGTGTGTGTT        |

**Table S3** CHISQ test for segregation of 803 markers on the 19 linkage groups of BnaZNF<sub>2</sub> genetic map.

| Linkage group | Marker_name | Position | A  | B   | H   | C   | D   | -  | Px <sup>2</sup> | Toward   |
|---------------|-------------|----------|----|-----|-----|-----|-----|----|-----------------|----------|
| A01           | BrGMS0081b  | 0.0      | 0  | 119 | 0   | 0   | 52  | 8  | 2.E-41          | No.73290 |
| A01           | niab097a    | 6.1      | 0  | 98  | 0   | 0   | 77  | 4  | 3.E-21          | No.73290 |
| A01           | BoSF2770    | 8.8      | 0  | 121 | 0   | 0   | 55  | 3  | 6.E-41          | No.73290 |
| A01           | BnEMS0886   | 13.3     | 13 | 60  | 14  | 0   | 0   | 92 | 2.E-20          | No.73290 |
| A01           | niab106     | 27.2     | 41 | 0   | 0   | 126 | 0   | 12 | 9.E-01          |          |
| A01           | niab071     | 37.5     | 48 | 0   | 0   | 131 | 0   | 0  | 6.E-01          |          |
| A01           | CNU139a     | 39.2     | 42 | 0   | 0   | 133 | 0   | 4  | 8.E-01          |          |
| A01           | CNU142c     | 41.5     | 44 | 0   | 0   | 135 | 0   | 0  | 9.E-01          |          |
| A01           | BrSF0019    | 43.4     | 43 | 45  | 89  | 0   | 0   | 2  | 1.E+00          |          |
| A01           | BoSF0224b   | 44.3     | 41 | 0   | 0   | 137 | 0   | 1  | 5.E-01          |          |
| A01           | BoSF0302    | 44.8     | 0  | 42  | 0   | 0   | 135 | 2  | 7.E-01          |          |
| A01           | BoSF1331a   | 46.8     | 43 | 0   | 0   | 131 | 0   | 5  | 9.E-01          |          |
| A01           | CB10081     | 50.4     | 41 | 42  | 93  | 0   | 0   | 3  | 7.E-01          |          |
| A01           | BRMS037     | 50.4     | 39 | 0   | 0   | 133 | 0   | 7  | 5.E-01          |          |
| A01           | niab113a    | 52.0     | 41 | 0   | 0   | 138 | 0   | 0  | 5.E-01          |          |
| A01           | BrSF0403    | 56.5     | 42 | 41  | 89  | 0   | 0   | 7  | 9.E-01          |          |
| A01           | BoSF2131    | 59.4     | 50 | 42  | 86  | 0   | 0   | 1  | 6.E-01          |          |
| A01           | CB10099a    | 69.1     | 44 | 0   | 0   | 120 | 0   | 15 | 6.E-01          |          |
| A01           | BrSF0016    | 72.2     | 0  | 37  | 0   | 0   | 141 | 1  | 2.E-01          |          |
| A01           | BrSF0446    | 82.7     | 49 | 37  | 92  | 0   | 0   | 1  | 4.E-01          |          |
| A01           | CB10189     | 83.5     | 49 | 40  | 87  | 0   | 0   | 3  | 6.E-01          |          |
| A01           | BoSF0764    | 87.5     | 0  | 39  | 0   | 0   | 137 | 3  | 4.E-01          |          |
| A01           | CNU132b     | 89.8     | 28 | 20  | 41  | 0   | 0   | 90 | 4.E-01          |          |
| A01           | BoSF0503    | 89.8     | 42 | 37  | 98  | 0   | 0   | 2  | 3.E-01          |          |
| A01           | Ra2G05      | 90.7     | 40 | 36  | 95  | 0   | 0   | 8  | 3.E-01          |          |
| A01           | BoSF1659    | 91.4     | 42 | 0   | 0   | 136 | 0   | 1  | 7.E-01          |          |
| A01           | BrSF0702    | 93.3     | 39 | 36  | 102 | 0   | 0   | 2  | 1.E-01          |          |
| A01           | SA63        | 93.8     | 37 | 37  | 105 | 0   | 0   | 0  | 7.E-02          |          |
| A01           | BrSF0703    | 94.1     | 36 | 37  | 106 | 0   | 0   | 0  | 5.E-02          |          |
| A01           | BrSF0706    | 95.0     | 0  | 37  | 0   | 0   | 140 | 2  | 2.E-01          |          |
| A01           | CNU068      | 98.1     | 37 | 0   | 0   | 142 | 0   | 0  | 2.E-01          |          |
| A01           | BrSF0010    | 98.1     | 38 | 71  | 69  | 0   | 0   | 1  | 2.E-05          | No.73290 |
| A01           | BrSF0009    | 98.5     | 36 | 0   | 0   | 143 | 0   | 0  | 1.E-01          |          |
| A01           | BoSF0050a   | 99.6     | 40 | 0   | 0   | 136 | 0   | 3  | 5.E-01          |          |
| A01           | BrSF0006    | 102.1    | 36 | 0   | 0   | 140 | 0   | 3  | 2.E-01          |          |
| A01           | CNU397      | 103.2    | 42 | 0   | 0   | 137 | 0   | 0  | 6.E-01          |          |
| A01           | BrSF1002    | 104.7    | 0  | 47  | 0   | 0   | 130 | 2  | 6.E-01          |          |
| A01           | TFZIP23     | 105.8    | 0  | 45  | 0   | 0   | 134 | 0  | 1.E+00          |          |
| A01           | sN3523      | 106.9    | 41 | 45  | 91  | 0   | 0   | 2  | 9.E-01          |          |
| A01           | BrSF0982    | 113.9    | 42 | 0   | 0   | 128 | 0   | 9  | 9.E-01          |          |
| A01           | BoSF0911    | 119.1    | 0  | 48  | 0   | 0   | 130 | 1  | 5.E-01          |          |
| A01           | CNU474      | 122.1    | 42 | 0   | 0   | 137 | 0   | 0  | 6.E-01          |          |
| A01           | CNU388      | 123.5    | 0  | 41  | 0   | 0   | 137 | 1  | 5.E-01          |          |

|     |           |       |    |    |     |     |     |    |        |  |
|-----|-----------|-------|----|----|-----|-----|-----|----|--------|--|
| A01 | BoSF1939  | 124.1 | 0  | 33 | 0   | 0   | 129 | 17 | 2.E-01 |  |
| A01 | BoSF2123  | 124.4 | 39 | 0  | 0   | 140 | 0   | 0  | 3.E-01 |  |
| A01 | BoSF0197  | 125.0 | 38 | 0  | 0   | 139 | 0   | 2  | 3.E-01 |  |
| A01 | BrSF0973  | 125.5 | 0  | 38 | 0   | 0   | 134 | 7  | 4.E-01 |  |
| A01 | Na14F11b  | 126.5 | 45 | 0  | 0   | 124 | 0   | 10 | 6.E-01 |  |
| A01 | BrSF0949  | 128.8 | 30 | 32 | 104 | 0   | 0   | 13 | 5.E-03 |  |
| A02 | niab025   | 0.0   | 53 | 0  | 0   | 122 | 0   | 4  | 1.E-01 |  |
| A02 | BoSF2549  | 5.7   | 44 | 0  | 0   | 130 | 0   | 5  | 9.E-01 |  |
| A02 | sR94102   | 6.1   | 0  | 20 | 0   | 0   | 66  | 93 | 7.E-01 |  |
| A02 | BrSF0051  | 9.4   | 55 | 36 | 87  | 0   | 0   | 1  | 1.E-01 |  |
| A02 | BrGMS0511 | 11.1  | 42 | 0  | 0   | 117 | 0   | 20 | 7.E-01 |  |
| A02 | BrSF0065a | 11.5  | 0  | 37 | 0   | 0   | 140 | 2  | 2.E-01 |  |
| A02 | BoSF0239  | 12.8  | 48 | 38 | 92  | 0   | 0   | 1  | 5.E-01 |  |
| A02 | BRAS083   | 18.4  | 0  | 38 | 0   | 0   | 140 | 1  | 3.E-01 |  |
| A02 | BrSF0665  | 19.1  | 50 | 0  | 0   | 127 | 0   | 2  | 3.E-01 |  |
| A02 | MR052     | 20.3  | 49 | 0  | 0   | 128 | 0   | 2  | 4.E-01 |  |
| A02 | BRAS037   | 22.4  | 48 | 44 | 83  | 0   | 0   | 4  | 7.E-01 |  |
| A02 | BrSF0062  | 23.6  | 50 | 0  | 0   | 129 | 0   | 0  | 4.E-01 |  |
| A02 | BrSF0661  | 24.9  | 45 | 45 | 85  | 0   | 0   | 4  | 9.E-01 |  |
| A02 | sN3761    | 26.2  | 46 | 0  | 0   | 123 | 0   | 10 | 5.E-01 |  |
| A02 | BoSF2224  | 27.2  | 48 | 42 | 85  | 0   | 0   | 4  | 8.E-01 |  |
| A02 | BrSF0663  | 28.0  | 45 | 0  | 0   | 131 | 0   | 3  | 9.E-01 |  |
| A02 | sR6293    | 29.9  | 49 | 47 | 83  | 0   | 0   | 0  | 6.E-01 |  |
| A02 | BrSF0045  | 30.5  | 50 | 44 | 75  | 0   | 0   | 10 | 3.E-01 |  |
| A02 | BoSF0329  | 31.6  | 46 | 0  | 0   | 133 | 0   | 0  | 8.E-01 |  |
| A02 | BrSF0750  | 33.5  | 46 | 42 | 91  | 0   | 0   | 0  | 9.E-01 |  |
| A02 | BrSF0053  | 34.0  | 46 | 42 | 90  | 0   | 0   | 1  | 9.E-01 |  |
| A02 | BrSF0052  | 34.2  | 48 | 0  | 0   | 129 | 0   | 2  | 5.E-01 |  |
| A02 | BrSF0754  | 34.6  | 48 | 41 | 90  | 0   | 0   | 0  | 8.E-01 |  |
| A02 | BrSF0755  | 36.2  | 50 | 43 | 86  | 0   | 0   | 0  | 7.E-01 |  |
| A02 | BrSF0049  | 38.2  | 52 | 0  | 0   | 126 | 0   | 1  | 2.E-01 |  |
| A02 | CNU046    | 41.9  | 53 | 42 | 82  | 0   | 0   | 2  | 3.E-01 |  |
| A02 | BrSF0031  | 43.1  | 51 | 41 | 85  | 0   | 0   | 2  | 5.E-01 |  |
| A02 | BoSF1714  | 43.6  | 39 | 0  | 0   | 96  | 0   | 44 | 3.E-01 |  |
| A02 | BoSF2100  | 45.9  | 46 | 0  | 0   | 128 | 0   | 5  | 7.E-01 |  |
| A02 | BrSF0570  | 47.2  | 48 | 0  | 0   | 128 | 0   | 3  | 4.E-01 |  |
| A02 | BrSF0056  | 47.8  | 49 | 42 | 87  | 0   | 0   | 1  | 7.E-01 |  |
| A02 | BrSF0679  | 48.5  | 0  | 36 | 0   | 0   | 140 | 3  | 2.E-01 |  |
| A02 | IFLP018   | 51.2  | 0  | 47 | 0   | 0   | 132 | 0  | 7.E-01 |  |
| A02 | BrSF0682  | 52.1  | 47 | 0  | 0   | 128 | 0   | 4  | 6.E-01 |  |
| A02 | BoSF0216  | 53.6  | 0  | 40 | 0   | 0   | 136 | 3  | 5.E-01 |  |
| A02 | FITO255   | 55.2  | 51 | 0  | 0   | 121 | 0   | 7  | 2.E-01 |  |
| A02 | BoSF0926c | 56.2  | 52 | 39 | 87  | 0   | 0   | 1  | 4.E-01 |  |
| A02 | BrSF0680  | 58.1  | 0  | 19 | 0   | 0   | 70  | 90 | 4.E-01 |  |
| A02 | BoSF1924  | 58.5  | 52 | 36 | 90  | 0   | 0   | 1  | 2.E-01 |  |
| A02 | BrSF1044  | 60.6  | 54 | 0  | 0   | 125 | 0   | 0  | 1.E-01 |  |

|     |           |      |    |    |    |     |     |    |        |
|-----|-----------|------|----|----|----|-----|-----|----|--------|
| A02 | BoSF2657  | 60.7 | 51 | 36 | 84 | 0   | 0   | 8  | 3.E-01 |
| A02 | BrSF0696  | 60.9 | 0  | 35 | 0  | 0   | 144 | 0  | 9.E-02 |
| A02 | BrSF0695  | 61.1 | 52 | 36 | 91 | 0   | 0   | 0  | 2.E-01 |
| A02 | BrSF0032  | 61.3 | 53 | 0  | 0  | 125 | 0   | 1  | 1.E-01 |
| A02 | BrSF0472  | 61.3 | 53 | 36 | 90 | 0   | 0   | 0  | 2.E-01 |
| A02 | BrSF0836  | 61.4 | 54 | 36 | 89 | 0   | 0   | 0  | 2.E-01 |
| A02 | CB10628   | 61.7 | 52 | 36 | 87 | 0   | 0   | 4  | 2.E-01 |
| A02 | BrSF0520  | 61.8 | 52 | 36 | 89 | 0   | 0   | 2  | 2.E-01 |
| A02 | BrSF0519  | 62.2 | 51 | 37 | 90 | 0   | 0   | 1  | 3.E-01 |
| A02 | BoSF2324  | 63.2 | 52 | 33 | 82 | 0   | 0   | 12 | 1.E-01 |
| A02 | BnEMS0401 | 65.5 | 0  | 37 | 0  | 0   | 141 | 1  | 2.E-01 |
| A02 | BrSF0689  | 67.3 | 58 | 39 | 82 | 0   | 0   | 0  | 7.E-02 |
| A02 | BoSF2214  | 79.6 | 52 | 33 | 93 | 0   | 0   | 1  | 1.E-01 |
| A02 | Na14B05   | 82.9 | 51 | 0  | 0  | 127 | 0   | 1  | 3.E-01 |
| A03 | niab115a  | 0.0  | 60 | 31 | 87 | 0   | 0   | 1  | 8.E-03 |
| A03 | BoSF1704  | 6.2  | 49 | 30 | 95 | 0   | 0   | 5  | 6.E-02 |
| A03 | BrGMS0642 | 12.1 | 44 | 0  | 0  | 104 | 0   | 31 | 2.E-01 |
| A03 | BrSF0422  | 12.8 | 50 | 35 | 94 | 0   | 0   | 0  | 2.E-01 |
| A03 | BrSF0427  | 15.6 | 44 | 36 | 78 | 0   | 0   | 21 | 7.E-01 |
| A03 | BrSF0350  | 16.1 | 52 | 35 | 91 | 0   | 0   | 1  | 2.E-01 |
| A03 | CB10036   | 16.5 | 52 | 34 | 88 | 0   | 0   | 5  | 2.E-01 |
| A03 | BoSF2852  | 17.1 | 52 | 31 | 94 | 0   | 0   | 2  | 6.E-02 |
| A03 | BrSF0029  | 18.6 | 28 | 22 | 38 | 0   | 0   | 91 | 3.E-01 |
| A03 | BoSF2392a | 20.6 | 0  | 40 | 0  | 0   | 137 | 2  | 5.E-01 |
| A03 | TFZIP19   | 21.1 | 0  | 41 | 0  | 0   | 135 | 3  | 6.E-01 |
| A03 | BrSF0090  | 21.8 | 49 | 47 | 80 | 0   | 0   | 3  | 5.E-01 |
| A03 | KS50980   | 21.8 | 56 | 40 | 82 | 0   | 0   | 1  | 1.E-01 |
| A03 | sR6688a   | 23.3 | 49 | 38 | 76 | 0   | 0   | 16 | 3.E-01 |
| A03 | BrSF0089  | 24.2 | 54 | 40 | 84 | 0   | 0   | 1  | 3.E-01 |
| A03 | BrSF0091  | 25.4 | 0  | 40 | 0  | 0   | 139 | 0  | 4.E-01 |
| A03 | BrSF0845a | 25.7 | 54 | 0  | 0  | 123 | 0   | 2  | 9.E-02 |
| A03 | BrSF0087a | 26.3 | 53 | 0  | 0  | 125 | 0   | 1  | 1.E-01 |
| A03 | BoSF2807  | 26.8 | 55 | 42 | 80 | 0   | 0   | 2  | 2.E-01 |
| A03 | BoSF0546  | 28.8 | 0  | 42 | 0  | 0   | 135 | 2  | 7.E-01 |
| A03 | BoSF0560  | 30.9 | 0  | 44 | 0  | 0   | 134 | 1  | 9.E-01 |
| A03 | BnEMS0894 | 32.2 | 55 | 40 | 80 | 0   | 0   | 4  | 1.E-01 |
| A03 | IGF2134f2 | 33.5 | 52 | 0  | 0  | 124 | 0   | 3  | 2.E-01 |
| A03 | BrSF0092  | 35.0 | 49 | 45 | 83 | 0   | 0   | 2  | 6.E-01 |
| A03 | CNU253    | 37.0 | 0  | 47 | 0  | 0   | 132 | 0  | 7.E-01 |
| A03 | Na12E02a  | 38.7 | 46 | 43 | 88 | 0   | 0   | 2  | 9.E-01 |
| A03 | O111B05   | 38.7 | 47 | 43 | 88 | 0   | 0   | 1  | 9.E-01 |
| A03 | BrSF0300  | 39.3 | 48 | 43 | 84 | 0   | 0   | 4  | 8.E-01 |
| A03 | BoSF0415b | 40.2 | 0  | 42 | 0  | 0   | 130 | 7  | 9.E-01 |
| A03 | BoSF2277  | 40.5 | 47 | 0  | 0  | 128 | 0   | 4  | 6.E-01 |
| A03 | CNU288    | 44.1 | 50 | 43 | 86 | 0   | 0   | 0  | 7.E-01 |
| A03 | BrSF0114  | 44.9 | 48 | 0  | 0  | 130 | 0   | 1  | 5.E-01 |

|     |           |       |    |    |    |     |     |    |        |  |
|-----|-----------|-------|----|----|----|-----|-----|----|--------|--|
| A03 | BoSF0664  | 45.2  | 0  | 45 | 0  | 0   | 133 | 1  | 9.E-01 |  |
| A03 | BoSF2744  | 48.1  | 41 | 48 | 87 | 0   | 0   | 3  | 7.E-01 |  |
| A03 | CNU466    | 48.9  | 0  | 42 | 0  | 0   | 122 | 15 | 9.E-01 |  |
| A03 | BrSF0078  | 49.8  | 0  | 47 | 0  | 0   | 131 | 1  | 7.E-01 |  |
| A03 | BoSF1709  | 50.8  | 45 | 47 | 84 | 0   | 0   | 3  | 8.E-01 |  |
| A03 | BoSF2220  | 51.3  | 50 | 0  | 0  | 121 | 0   | 8  | 2.E-01 |  |
| A03 | BoSF2915  | 52.8  | 43 | 48 | 87 | 0   | 0   | 1  | 8.E-01 |  |
| A03 | CB10329   | 55.4  | 45 | 48 | 83 | 0   | 0   | 3  | 7.E-01 |  |
| A03 | BoSF1715  | 55.4  | 0  | 49 | 0  | 0   | 126 | 4  | 4.E-01 |  |
| A03 | BrSF0295  | 55.9  | 0  | 50 | 0  | 0   | 125 | 4  | 3.E-01 |  |
| A03 | BoSF1886  | 57.5  | 45 | 54 | 78 | 0   | 0   | 2  | 2.E-01 |  |
| A03 | CNU098    | 62.1  | 39 | 0  | 0  | 140 | 0   | 0  | 3.E-01 |  |
| A03 | BoSF1678  | 62.1  | 39 | 0  | 0  | 139 | 0   | 1  | 3.E-01 |  |
| A03 | CNU259    | 64.0  | 0  | 54 | 0  | 0   | 124 | 1  | 1.E-01 |  |
| A03 | FITO285   | 66.5  | 38 | 43 | 96 | 0   | 0   | 2  | 5.E-01 |  |
| A03 | BoSF1651  | 67.0  | 39 | 45 | 93 | 0   | 0   | 2  | 6.E-01 |  |
| A03 | BrSF0102  | 68.4  | 37 | 46 | 95 | 0   | 0   | 1  | 4.E-01 |  |
| A03 | CNU422    | 69.8  | 32 | 45 | 94 | 0   | 0   | 8  | 2.E-01 |  |
| A03 | Na14G10   | 70.6  | 35 | 46 | 95 | 0   | 0   | 3  | 3.E-01 |  |
| A03 | Ol11G11   | 70.6  | 31 | 49 | 88 | 0   | 0   | 11 | 1.E-01 |  |
| A03 | sN11722   | 73.6  | 34 | 49 | 94 | 0   | 0   | 2  | 3.E-01 |  |
| A03 | CB10114   | 73.6  | 39 | 0  | 0  | 140 | 0   | 0  | 3.E-01 |  |
| A03 | BoSF0598  | 73.7  | 35 | 0  | 0  | 141 | 0   | 3  | 1.E-01 |  |
| A03 | BoSF2828  | 76.1  | 38 | 0  | 0  | 131 | 0   | 10 | 5.E-01 |  |
| A03 | BoSF1085  | 98.9  | 0  | 46 | 0  | 0   | 133 | 0  | 8.E-01 |  |
| A03 | CNU371    | 100.4 | 0  | 43 | 0  | 0   | 129 | 7  | 1.E+00 |  |
| A03 | CNU223    | 101.4 | 36 | 45 | 98 | 0   | 0   | 0  | 3.E-01 |  |
| A03 | BoSF2145  | 104.1 | 39 | 0  | 0  | 140 | 0   | 0  | 3.E-01 |  |
| A03 | sR11644   | 105.8 | 35 | 53 | 84 | 0   | 0   | 7  | 1.E-01 |  |
| A03 | BoSF0346  | 105.9 | 0  | 48 | 0  | 0   | 131 | 0  | 6.E-01 |  |
| A03 | BoSF0393  | 105.9 | 39 | 0  | 0  | 140 | 0   | 0  | 3.E-01 |  |
| A03 | MR181     | 109.8 | 0  | 47 | 0  | 0   | 130 | 2  | 6.E-01 |  |
| A03 | BoGMS1071 | 110.6 | 0  | 45 | 0  | 0   | 125 | 9  | 7.E-01 |  |
| A03 | KS40432   | 111.8 | 36 | 45 | 96 | 0   | 0   | 2  | 3.E-01 |  |
| A03 | BnGMS0616 | 114.4 | 38 | 46 | 87 | 0   | 0   | 8  | 7.E-01 |  |
| A03 | BoSF1919  | 116.0 | 40 | 0  | 0  | 126 | 0   | 13 | 8.E-01 |  |
| A03 | BrSF0708  | 118.3 | 39 | 0  | 0  | 136 | 0   | 4  | 4.E-01 |  |
| A03 | BoSF1779  | 122.0 | 36 | 0  | 0  | 127 | 0   | 16 | 4.E-01 |  |
| A03 | CB10425   | 126.4 | 38 | 50 | 85 | 0   | 0   | 6  | 4.E-01 |  |
| A03 | BrSF0918  | 129.1 | 43 | 0  | 0  | 132 | 0   | 4  | 9.E-01 |  |
| A04 | BrSF0564  | 0.0   | 36 | 39 | 83 | 0   | 0   | 21 | 8.E-01 |  |
| A04 | BoSF2609  | 1.8   | 0  | 45 | 0  | 0   | 134 | 0  | 1.E+00 |  |
| A04 | BrSF0560  | 5.4   | 46 | 42 | 84 | 0   | 0   | 7  | 9.E-01 |  |
| A04 | BrSF0112  | 6.6   | 48 | 45 | 86 | 0   | 0   | 0  | 8.E-01 |  |
| A04 | BoSF0336a | 11.2  | 0  | 49 | 0  | 0   | 130 | 0  | 5.E-01 |  |
| A04 | IFLP014   | 13.4  | 45 | 44 | 90 | 0   | 0   | 0  | 1.E+00 |  |

|     |           |      |    |    |     |     |     |    |        |          |
|-----|-----------|------|----|----|-----|-----|-----|----|--------|----------|
| A04 | BnGMS0115 | 14.9 | 45 | 44 | 88  | 0   | 0   | 2  | 1.E+00 |          |
| A04 | BrSF1049  | 17.3 | 45 | 0  | 0   | 134 | 0   | 0  | 1.E+00 |          |
| A04 | BrSF1032  | 18.0 | 0  | 39 | 0   | 0   | 140 | 0  | 3.E-01 |          |
| A04 | niab143   | 19.1 | 20 | 0  | 0   | 70  | 0   | 89 | 5.E-01 |          |
| A04 | BoSF1125  | 20.4 | 0  | 44 | 0   | 0   | 135 | 0  | 9.E-01 |          |
| A04 | sN2025    | 24.6 | 0  | 41 | 0   | 0   | 126 | 12 | 9.E-01 |          |
| A04 | CNU246    | 33.3 | 44 | 44 | 86  | 0   | 0   | 5  | 1.E+00 |          |
| A04 | BoSF1161  | 35.1 | 43 | 50 | 86  | 0   | 0   | 0  | 7.E-01 |          |
| A04 | CNU039    | 36.1 | 44 | 0  | 0   | 129 | 0   | 6  | 9.E-01 |          |
| A04 | BrSF0726  | 47.0 | 44 | 51 | 84  | 0   | 0   | 0  | 5.E-01 |          |
| A04 | BoSF0415a | 48.4 | 40 | 49 | 86  | 0   | 0   | 4  | 6.E-01 |          |
| A04 | BoSF0482  | 50.1 | 40 | 0  | 0   | 139 | 0   | 0  | 4.E-01 |          |
| A04 | BrSF0719  | 50.6 | 0  | 58 | 0   | 0   | 118 | 3  | 1.E-02 |          |
| A04 | BoSF1476  | 52.1 | 0  | 56 | 0   | 0   | 123 | 0  | 5.E-02 |          |
| A04 | BrSF0646  | 54.8 | 35 | 54 | 88  | 0   | 0   | 2  | 1.E-01 |          |
| A04 | BrSF0120  | 56.3 | 0  | 54 | 0   | 0   | 123 | 2  | 9.E-02 |          |
| A04 | BoSF0231  | 56.8 | 37 | 56 | 86  | 0   | 0   | 0  | 1.E-01 |          |
| A04 | BrSF0645  | 57.7 | 33 | 49 | 75  | 0   | 0   | 22 | 2.E-01 |          |
| A04 | IFLP036   | 59.7 | 34 | 0  | 0   | 143 | 0   | 2  | 8.E-02 |          |
| A04 | BoSF1555  | 60.1 | 0  | 56 | 0   | 0   | 122 | 1  | 5.E-02 |          |
| A04 | BoSF1642  | 62.5 | 0  | 54 | 0   | 0   | 122 | 3  | 8.E-02 |          |
| A04 | BrSF0643  | 63.2 | 37 | 0  | 0   | 124 | 0   | 18 | 6.E-01 |          |
| A04 | BrSF0642a | 64.4 | 25 | 25 | 33  | 0   | 0   | 96 | 2.E-01 |          |
| A04 | BoSF0841b | 68.3 | 34 | 0  | 0   | 143 | 0   | 2  | 8.E-02 |          |
| A04 | BoSF2769  | 70.6 | 0  | 49 | 0   | 0   | 125 | 5  | 3.E-01 |          |
| A04 | BrSF0969  | 79.4 | 25 | 0  | 0   | 152 | 0   | 2  | 8.E-04 | No.73290 |
| A04 | BrSF0972  | 87.1 | 23 | 86 | 52  | 0   | 0   | 18 | 8.E-16 | No.73290 |
| A05 | BoSF1666  | 0.0  | 39 | 46 | 90  | 0   | 0   | 4  | 7.E-01 |          |
| A05 | Na14G02   | 3.7  | 41 | 29 | 102 | 0   | 0   | 7  | 2.E-02 |          |
| A05 | BrSF0712  | 4.8  | 42 | 29 | 102 | 0   | 0   | 6  | 2.E-02 |          |
| A05 | ns213     | 11.3 | 46 | 0  | 0   | 133 | 0   | 0  | 8.E-01 |          |
| A05 | ns218     | 12.1 | 47 | 0  | 0   | 132 | 0   | 0  | 7.E-01 |          |
| A05 | ns231     | 12.3 | 0  | 35 | 0   | 0   | 127 | 17 | 3.E-01 |          |
| A05 | BoSF2141  | 14.4 | 44 | 0  | 0   | 134 | 0   | 1  | 9.E-01 |          |
| A05 | BrSF0975a | 20.7 | 43 | 37 | 97  | 0   | 0   | 2  | 4.E-01 |          |
| A05 | BrSF0942  | 20.8 | 42 | 0  | 0   | 129 | 0   | 8  | 9.E-01 |          |
| A05 | CNU398    | 20.8 | 59 | 0  | 0   | 119 | 0   | 1  | 1.E-02 |          |
| A05 | BoSF1098  | 21.2 | 43 | 0  | 0   | 136 | 0   | 0  | 8.E-01 |          |
| A05 | Na12E01a  | 22.8 | 40 | 40 | 95  | 0   | 0   | 4  | 5.E-01 |          |
| A05 | BrSF0620  | 23.8 | 32 | 43 | 101 | 0   | 0   | 3  | 7.E-02 |          |
| A05 | BnGMS0293 | 24.5 | 43 | 44 | 89  | 0   | 0   | 3  | 1.E+00 |          |
| A05 | BrSF0952  | 24.5 | 44 | 41 | 92  | 0   | 0   | 2  | 8.E-01 |          |
| A05 | CNU029    | 24.7 | 44 | 44 | 87  | 0   | 0   | 4  | 1.E+00 |          |
| A05 | BrSF0550  | 25.1 | 44 | 45 | 89  | 0   | 0   | 1  | 1.E+00 |          |
| A05 | BrSF1031b | 26.5 | 0  | 40 | 0   | 0   | 134 | 5  | 5.E-01 |          |
| A05 | BrSF0849  | 26.6 | 42 | 42 | 87  | 0   | 0   | 8  | 1.E+00 |          |

|     |           |      |    |    |    |     |     |    |        |  |
|-----|-----------|------|----|----|----|-----|-----|----|--------|--|
| A05 | ns211     | 28.1 | 49 | 0  | 0  | 130 | 0   | 0  | 5.E-01 |  |
| A05 | BrSF0618  | 29.9 | 42 | 41 | 96 | 0   | 0   | 0  | 6.E-01 |  |
| A05 | BrGMS0293 | 34.2 | 43 | 42 | 91 | 0   | 0   | 3  | 9.E-01 |  |
| A05 | BoSF1230  | 37.7 | 23 | 19 | 47 | 0   | 0   | 90 | 7.E-01 |  |
| A05 | IFLP039   | 42.3 | 49 | 39 | 87 | 0   | 0   | 4  | 6.E-01 |  |
| A05 | BrSF0497  | 45.7 | 43 | 38 | 94 | 0   | 0   | 4  | 5.E-01 |  |
| A05 | BoSF0582  | 46.0 | 47 | 36 | 95 | 0   | 0   | 1  | 3.E-01 |  |
| A05 | BoSF0259  | 46.1 | 48 | 0  | 0  | 131 | 0   | 0  | 6.E-01 |  |
| A05 | BoSF1749  | 46.6 | 45 | 0  | 0  | 130 | 0   | 4  | 8.E-01 |  |
| A05 | CNU268    | 49.2 | 0  | 34 | 0  | 0   | 144 | 1  | 7.E-02 |  |
| A05 | BoSF2746  | 50.6 | 0  | 36 | 0  | 0   | 139 | 4  | 2.E-01 |  |
| A05 | BoSF2030  | 51.3 | 0  | 34 | 0  | 0   | 136 | 9  | 1.E-01 |  |
| A05 | BrSF0491  | 52.5 | 48 | 35 | 92 | 0   | 0   | 4  | 3.E-01 |  |
| A05 | snap1047a | 55.6 | 51 | 0  | 0  | 125 | 0   | 3  | 2.E-01 |  |
| A06 | BoSF0784  | 0.0  | 59 | 32 | 87 | 0   | 0   | 1  | 2.E-02 |  |
| A06 | BrSF0149  | 1.1  | 56 | 33 | 90 | 0   | 0   | 0  | 5.E-02 |  |
| A06 | BoSF2253  | 2.0  | 58 | 32 | 84 | 0   | 0   | 5  | 2.E-02 |  |
| A06 | BoSF0869  | 4.8  | 60 | 33 | 84 | 0   | 0   | 2  | 1.E-02 |  |
| A06 | BoSF0455c | 5.7  | 0  | 33 | 0  | 0   | 143 | 3  | 6.E-02 |  |
| A06 | BrSF0860  | 7.4  | 52 | 0  | 0  | 109 | 0   | 18 | 3.E-02 |  |
| A06 | CB10143   | 9.3  | 55 | 35 | 84 | 0   | 0   | 5  | 9.E-02 |  |
| A06 | IFLP001   | 12.1 | 56 | 36 | 86 | 0   | 0   | 1  | 1.E-01 |  |
| A06 | BoSF1212b | 13.5 | 0  | 19 | 0  | 0   | 70  | 90 | 4.E-01 |  |
| A06 | BrSF0741  | 17.7 | 0  | 39 | 0  | 0   | 140 | 0  | 3.E-01 |  |
| A06 | BoSF1521  | 19.7 | 51 | 37 | 91 | 0   | 0   | 0  | 3.E-01 |  |
| A06 | BrSF0743  | 21.4 | 52 | 37 | 88 | 0   | 0   | 2  | 3.E-01 |  |
| A06 | BoSF2583  | 25.7 | 44 | 41 | 91 | 0   | 0   | 3  | 9.E-01 |  |
| A06 | BoSF2360  | 29.5 | 48 | 41 | 85 | 0   | 0   | 5  | 7.E-01 |  |
| A06 | BoSF0022a | 30.2 | 45 | 45 | 88 | 0   | 0   | 1  | 1.E+00 |  |
| A06 | BRAS052   | 34.2 | 48 | 56 | 72 | 0   | 0   | 3  | 4.E-02 |  |
| A06 | BrSF0171  | 39.3 | 47 | 0  | 0  | 131 | 0   | 1  | 7.E-01 |  |
| A06 | BoSF1990  | 41.4 | 45 | 45 | 86 | 0   | 0   | 3  | 1.E+00 |  |
| A06 | BoSF1752  | 42.8 | 41 | 0  | 0  | 133 | 0   | 5  | 7.E-01 |  |
| A06 | BnGMS0480 | 46.5 | 39 | 44 | 95 | 0   | 0   | 1  | 6.E-01 |  |
| A06 | CNU050    | 47.1 | 40 | 0  | 0  | 135 | 0   | 4  | 5.E-01 |  |
| A06 | IGF1653c  | 47.3 | 23 | 22 | 41 | 0   | 0   | 93 | 9.E-01 |  |
| A06 | CNU149    | 47.6 | 41 | 46 | 92 | 0   | 0   | 0  | 8.E-01 |  |
| A06 | CB10006   | 48.1 | 42 | 0  | 0  | 137 | 0   | 0  | 6.E-01 |  |
| A06 | BrSF0858b | 48.8 | 0  | 47 | 0  | 0   | 121 | 11 | 4.E-01 |  |
| A06 | BrSF0789  | 52.5 | 42 | 52 | 84 | 0   | 0   | 1  | 4.E-01 |  |
| A06 | ENA23     | 54.9 | 0  | 50 | 0  | 0   | 123 | 6  | 2.E-01 |  |
| A06 | BoSF2407  | 55.5 | 0  | 52 | 0  | 0   | 122 | 5  | 1.E-01 |  |
| A06 | BoSF1509  | 56.3 | 0  | 50 | 0  | 0   | 129 | 0  | 4.E-01 |  |
| A06 | BrSF0154  | 57.5 | 42 | 56 | 79 | 0   | 0   | 2  | 1.E-01 |  |
| A06 | BrSF0153  | 59.3 | 44 | 50 | 85 | 0   | 0   | 0  | 7.E-01 |  |
| A06 | BoSF1414  | 60.6 | 47 | 0  | 0  | 132 | 0   | 0  | 7.E-01 |  |

|     |             |       |    |    |    |     |     |    |        |               |
|-----|-------------|-------|----|----|----|-----|-----|----|--------|---------------|
| A06 | BoGMS0314   | 63.7  | 45 | 48 | 67 | 0   | 0   | 19 | 1.E-01 |               |
| A06 | BoSF1522    | 65.3  | 49 | 0  | 0  | 130 | 0   | 0  | 5.E-01 |               |
| A06 | IGF5707b    | 65.9  | 0  | 25 | 0  | 0   | 65  | 89 | 5.E-01 |               |
| A06 | sS1949      | 66.1  | 47 | 0  | 0  | 126 | 0   | 6  | 5.E-01 |               |
| A06 | BoSF0213    | 66.7  | 0  | 52 | 0  | 0   | 127 | 0  | 2.E-01 |               |
| A06 | BrSF47-382a | 76.7  | 38 | 56 | 83 | 0   | 0   | 2  | 1.E-01 |               |
| A06 | BrSF47-389  | 78.9  | 40 | 58 | 75 | 0   | 0   | 6  | 3.E-02 |               |
| A06 | BrSF0162    | 79.7  | 44 | 53 | 71 | 0   | 0   | 11 | 8.E-02 |               |
| A06 | CNU400      | 80.0  | 44 | 57 | 78 | 0   | 0   | 0  | 9.E-02 |               |
| A06 | BrSF47-277  | 81.9  | 36 | 56 | 71 | 0   | 0   | 16 | 2.E-02 |               |
| A06 | BrSF47-234  | 82.8  | 33 | 57 | 72 | 0   | 0   | 17 | 1.E-02 |               |
| A06 | BoSF1088    | 83.5  | 38 | 0  | 0  | 141 | 0   | 0  | 2.E-01 |               |
| A06 | BoSF2406    | 83.8  | 42 | 60 | 72 | 0   | 0   | 5  | 1.E-02 |               |
| A06 | BrSF0820    | 84.3  | 0  | 60 | 0  | 0   | 115 | 4  | 5.E-03 |               |
| A06 | BrSF46-22   | 84.3  | 0  | 61 | 0  | 0   | 109 | 9  | 1.E-03 |               |
| A06 | BrSF47-10   | 84.3  | 37 | 58 | 71 | 0   | 0   | 13 | 1.E-02 |               |
| A06 | BrSF47-54   | 84.5  | 39 | 61 | 75 | 0   | 0   | 4  | 1.E-02 |               |
| A06 | BrSF0821    | 84.7  | 39 | 0  | 0  | 140 | 0   | 0  | 3.E-01 |               |
| A06 | BoSF0783a   | 84.7  | 39 | 0  | 0  | 136 | 0   | 4  | 4.E-01 |               |
| A06 | BrSF0819    | 85.0  | 39 | 61 | 78 | 0   | 0   | 1  | 2.E-02 |               |
| A06 | BrSF46-186  | 85.3  | 34 | 60 | 68 | 0   | 0   | 17 | 2.E-03 |               |
| A06 | BrSF46-177  | 85.4  | 37 | 57 | 69 | 0   | 0   | 16 | 1.E-02 |               |
| A06 | BrSF46-176a | 85.7  | 35 | 53 | 64 | 0   | 0   | 27 | 2.E-02 |               |
| A06 | BrSF46-167  | 86.4  | 38 | 60 | 70 | 0   | 0   | 11 | 5.E-03 |               |
| A06 | BrSF46-306  | 87.4  | 36 | 58 | 73 | 0   | 0   | 12 | 1.E-02 |               |
| A06 | BrSF46-291  | 87.8  | 33 | 53 | 64 | 0   | 0   | 29 | 1.E-02 |               |
| A06 | BrSF46-238  | 88.2  | 39 | 60 | 69 | 0   | 0   | 11 | 5.E-03 |               |
| A06 | BrSF0822    | 88.9  | 0  | 60 | 0  | 0   | 119 | 0  | 8.E-03 |               |
| A06 | BrSF0166    | 93.8  | 0  | 60 | 0  | 0   | 119 | 0  | 8.E-03 |               |
| A06 | BnID108     | 97.0  | 38 | 55 | 78 | 0   | 0   | 8  | 1.E-01 |               |
| A06 | BrSF0144    | 97.7  | 41 | 56 | 82 | 0   | 0   | 0  | 2.E-01 |               |
| A06 | BoSF2702    | 98.3  | 41 | 56 | 82 | 0   | 0   | 0  | 2.E-01 |               |
| A06 | BnID107     | 99.1  | 37 | 57 | 80 | 0   | 0   | 5  | 6.E-02 |               |
| A06 | BoSF2788    | 99.7  | 98 | 0  | 0  | 79  | 0   | 2  | 1.E-20 | Zhongshuang11 |
| A06 | BoSF0215    | 113.3 | 42 | 48 | 85 | 0   | 0   | 4  | 8.E-01 |               |
| A07 | sR4047      | 0.0   | 34 | 44 | 80 | 0   | 0   | 21 | 5.E-01 |               |
| A07 | sR282       | 0.9   | 33 | 0  | 0  | 140 | 0   | 6  | 7.E-02 |               |
| A07 | BoSF2344    | 3.7   | 39 | 53 | 87 | 0   | 0   | 0  | 3.E-01 |               |
| A07 | BoSF0665    | 6.9   | 40 | 0  | 0  | 139 | 0   | 0  | 4.E-01 |               |
| A07 | BRAS023     | 13.2  | 40 | 53 | 85 | 0   | 0   | 1  | 3.E-01 |               |
| A07 | AT1G27050   | 16.3  | 39 | 52 | 87 | 0   | 0   | 1  | 4.E-01 |               |
| A07 | BoSF2653    | 17.8  | 42 | 0  | 0  | 136 | 0   | 1  | 7.E-01 |               |
| A07 | BrSF0331    | 20.1  | 42 | 51 | 85 | 0   | 0   | 1  | 5.E-01 |               |
| A07 | CNU273      | 35.2  | 37 | 54 | 88 | 0   | 0   | 0  | 2.E-01 |               |
| A07 | BrSF0185    | 35.2  | 22 | 25 | 42 | 0   | 0   | 90 | 8.E-01 |               |
| A07 | sR7223      | 37.8  | 40 | 48 | 86 | 0   | 0   | 5  | 7.E-01 |               |

|     |            |      |     |    |    |     |     |    |        |               |
|-----|------------|------|-----|----|----|-----|-----|----|--------|---------------|
| A07 | niab043    | 46.9 | 37  | 54 | 85 | 0   | 0   | 3  | 2.E-01 |               |
| A07 | BRMS036    | 53.7 | 25  | 50 | 90 | 0   | 0   | 14 | 1.E-02 |               |
| A07 | BoSF0898   | 60.5 | 0   | 49 | 0  | 0   | 130 | 0  | 5.E-01 |               |
| A07 | CNU339     | 61.2 | 33  | 49 | 94 | 0   | 0   | 3  | 2.E-01 |               |
| A07 | CNU037     | 62.7 | 35  | 47 | 96 | 0   | 0   | 1  | 3.E-01 |               |
| A07 | BoGMS2110  | 69.6 | 0   | 57 | 0  | 0   | 121 | 1  | 3.E-02 |               |
| A07 | CNU331b    | 71.1 | 41  | 0  | 0  | 135 | 0   | 3  | 6.E-01 |               |
| A07 | CNU043     | 73.8 | 40  | 52 | 79 | 0   | 0   | 8  | 3.E-01 |               |
| A07 | CNU053     | 80.4 | 0   | 47 | 0  | 0   | 130 | 2  | 6.E-01 |               |
| A07 | CNU052     | 81.1 | 38  | 51 | 87 | 0   | 0   | 3  | 4.E-01 |               |
| A07 | BoSF2257   | 82.1 | 36  | 0  | 0  | 138 | 0   | 5  | 2.E-01 |               |
| A07 | BrSF0480   | 84.9 | 39  | 56 | 78 | 0   | 0   | 6  | 8.E-02 |               |
| A07 | BoSF2703   | 87.9 | 41  | 53 | 82 | 0   | 0   | 3  | 3.E-01 |               |
| A07 | BoSF0707   | 91.5 | 0   | 50 | 0  | 0   | 126 | 3  | 3.E-01 |               |
| A07 | BoSF1972   | 92.5 | 0   | 48 | 0  | 0   | 127 | 4  | 5.E-01 |               |
| A07 | CNU308     | 96.8 | 0   | 48 | 0  | 0   | 126 | 5  | 4.E-01 |               |
| A08 | BoSF0711a  | 0.0  | 0   | 45 | 0  | 0   | 125 | 9  | 7.E-01 |               |
| A08 | BnEMS1142  | 1.2  | 34  | 46 | 95 | 0   | 0   | 4  | 2.E-01 |               |
| A08 | BrGMS0339a | 4.3  | 26  | 46 | 92 | 0   | 0   | 15 | 3.E-02 |               |
| A08 | BrSF0210   | 6.8  | 35  | 45 | 98 | 0   | 0   | 1  | 2.E-01 |               |
| A08 | snap0675   | 13.4 | 0   | 57 | 0  | 0   | 122 | 0  | 3.E-02 |               |
| A08 | BoSF2672   | 14.1 | 38  | 0  | 0  | 135 | 0   | 6  | 4.E-01 |               |
| A08 | BnEMS0412  | 16.1 | 0   | 51 | 0  | 0   | 117 | 11 | 1.E-01 |               |
| A08 | BrSF0606   | 19.0 | 39  | 54 | 82 | 0   | 0   | 4  | 2.E-01 |               |
| A08 | BoSF1830   | 19.5 | 37  | 0  | 0  | 139 | 0   | 3  | 2.E-01 |               |
| A08 | BoSF0693   | 23.3 | 42  | 54 | 82 | 0   | 0   | 1  | 3.E-01 |               |
| A08 | BnEMS0236  | 23.3 | 21  | 27 | 38 | 0   | 0   | 93 | 4.E-01 |               |
| A08 | sN12352    | 25.4 | 0   | 52 | 0  | 0   | 116 | 11 | 7.E-02 |               |
| A08 | BrGMS0825  | 27.4 | 37  | 50 | 83 | 0   | 0   | 9  | 4.E-01 |               |
| A08 | BoSF2499   | 32.6 | 41  | 53 | 79 | 0   | 0   | 6  | 2.E-01 |               |
| A09 | KS51170    | 0.0  | 157 | 7  | 15 | 0   | 0   | 0  | 3.E-82 | Zhongshuang11 |
| A09 | BrSF0916a  | 1.6  | 151 | 7  | 19 | 0   | 0   | 2  | 3.E-75 | Zhongshuang11 |
| A09 | BnID044    | 3.7  | 0   | 38 | 0  | 0   | 139 | 2  | 3.E-01 |               |
| A09 | BrSF0255   | 7.0  | 0   | 43 | 0  | 0   | 136 | 0  | 8.E-01 |               |
| A09 | BnID043    | 8.3  | 40  | 31 | 97 | 0   | 0   | 11 | 8.E-02 |               |
| A09 | BnID045    | 9.1  | 38  | 36 | 70 | 0   | 0   | 35 | 9.E-01 |               |
| A09 | BnID047    | 9.5  | 43  | 38 | 86 | 0   | 0   | 12 | 8.E-01 |               |
| A09 | BnID046    | 10.3 | 44  | 32 | 90 | 0   | 0   | 13 | 2.E-01 |               |
| A09 | CNU157     | 11.4 | 46  | 39 | 94 | 0   | 0   | 0  | 6.E-01 |               |
| A09 | BnID042    | 12.2 | 42  | 33 | 89 | 0   | 0   | 15 | 3.E-01 |               |
| A09 | CNU004     | 12.9 | 40  | 0  | 0  | 128 | 0   | 11 | 7.E-01 |               |
| A09 | BnID040    | 14.0 | 41  | 33 | 92 | 0   | 0   | 13 | 3.E-01 |               |
| A09 | BnID041    | 14.5 | 0   | 29 | 0  | 0   | 134 | 16 | 3.E-02 |               |
| A09 | BoSF0270   | 15.4 | 42  | 38 | 98 | 0   | 0   | 1  | 4.E-01 |               |
| A09 | BoSF2624   | 34.3 | 55  | 40 | 83 | 0   | 0   | 1  | 2.E-01 |               |
| A09 | BnID052    | 36.8 | 55  | 38 | 74 | 0   | 0   | 12 | 6.E-02 |               |

|     |             |             |    |     |    |     |     |    |        |          |
|-----|-------------|-------------|----|-----|----|-----|-----|----|--------|----------|
| A09 | BnID053     | 37.1        | 59 | 36  | 76 | 0   | 0   | 8  | 2.E-02 |          |
| A09 | ns156       | 40.9        | 0  | 49  | 0  | 0   | 130 | 0  | 5.E-01 |          |
| A09 | BoSF2489    | 44.0        | 57 | 54  | 67 | 0   | 0   | 1  | 4.E-03 |          |
| A09 | BrSF0998    | 45.8        | 56 | 44  | 76 | 0   | 0   | 3  | 9.E-02 |          |
| A09 | CNU402      | 47.2        | 55 | 51  | 73 | 0   | 0   | 0  | 4.E-02 |          |
| A09 | BnID056     | 49.0        | 29 | 24  | 39 | 0   | 0   | 87 | 3.E-01 |          |
| A09 | ns155       | 49.5        | 0  | 54  | 0  | 0   | 125 | 0  | 1.E-01 |          |
| A09 | BrSF6-104   | 50.1        | 57 | 49  | 65 | 0   | 0   | 8  | 5.E-03 |          |
| A09 | ns162       | 53.1        | 0  | 56  | 0  | 0   | 122 | 1  | 5.E-02 |          |
| A09 | ns160       | 55.1        | 0  | 55  | 0  | 0   | 119 | 5  | 4.E-02 |          |
| A09 | ns158       | 56.4        | 62 | 0   | 0  | 117 | 0   | 0  | 3.E-03 |          |
| A09 | ns161       | 56.8        | 0  | 52  | 0  | 0   | 121 | 6  | 1.E-01 |          |
| A09 | BoSF0232    | 58.9        | 0  | 45  | 0  | 0   | 134 | 0  | 1.E+00 |          |
| A09 | ns164       | 60.5        | 0  | 38  | 0  | 0   | 127 | 14 | 6.E-01 |          |
| A09 | ns163       | 60.5        | 0  | 50  | 0  | 0   | 127 | 2  | 3.E-01 |          |
| A09 | BnSF2342-39 | 68.9        | 56 | 45  | 72 | 0   | 0   | 6  | 4.E-02 |          |
| A09 | ns165       | 70.7        | 55 | 0   | 0  | 109 | 0   | 15 | 1.E-02 |          |
| A09 | ns166       | 70.7        | 0  | 56  | 0  | 0   | 120 | 3  | 4.E-02 |          |
| A09 | ns168       | 70.7        | 0  | 50  | 0  | 0   | 129 | 0  | 4.E-01 |          |
| A09 | ns167       | 70.7        | 0  | 34  | 0  | 0   | 127 | 18 | 3.E-01 |          |
| A09 | BnID076     | 71.4        | 54 | 37  | 82 | 0   | 0   | 6  | 1.E-01 |          |
| A09 | BnID075     | 72.1        | 51 | 40  | 83 | 0   | 0   | 5  | 4.E-01 |          |
| A09 | BrSF6-2245  | 74.2        | 46 | 36  | 58 | 0   | 0   | 39 | 6.E-02 |          |
| A09 | BrSF6-2562  | <b>76.4</b> | 57 | 36  | 73 | 0   | 0   | 13 | 2.E-02 |          |
| A09 | BnSF400-253 | 76.8        | 0  | 37  | 0  | 0   | 129 | 13 | 4.E-01 |          |
| A09 | BnID060     | 77.1        | 58 | 38  | 73 | 0   | 0   | 10 | 2.E-02 |          |
| A09 | BrSF0385    | 78.0        | 51 | 34  | 81 | 0   | 0   | 13 | 2.E-01 |          |
| A09 | BnID081     | 79.1        | 57 | 36  | 79 | 0   | 0   | 7  | 4.E-02 |          |
| A09 | BoSF0333    | 79.6        | 56 | 0   | 0  | 119 | 0   | 4  | 3.E-02 |          |
| A09 | BoSF2710    | 81.5        | 55 | 0   | 0  | 123 | 0   | 1  | 7.E-02 |          |
| A09 | BoSF2709    | 81.8        | 55 | 38  | 86 | 0   | 0   | 0  | 2.E-01 |          |
| A09 | ENA27       | 82.0        | 55 | 0   | 0  | 123 | 0   | 1  | 7.E-02 |          |
| A09 | BnID082     | 82.9        | 0  | 49  | 0  | 0   | 118 | 12 | 2.E-01 |          |
| A09 | BnSF400-28  | 95.9        | 34 | 0   | 0  | 134 | 0   | 11 | 2.E-01 |          |
| A09 | BrSF6-2380  | 96.8        | 35 | 0   | 0  | 139 | 0   | 5  | 1.E-01 |          |
| A09 | BrSF0383    | 100.2       | 37 | 85  | 45 | 0   | 0   | 12 | 2.E-14 | No.73290 |
| A09 | CNU264      | 100.2       | 36 | 91  | 46 | 0   | 0   | 6  | 1.E-16 | No.73290 |
| A09 | BrSF0251    | 102.0       | 38 | 100 | 40 | 0   | 0   | 1  | 8.E-22 | No.73290 |
| A09 | BrSF6-2389  | 102.0       | 38 | 95  | 43 | 0   | 0   | 3  | 1.E-18 | No.73290 |
| A09 | BnSF400-29  | 102.5       | 36 | 94  | 35 | 0   | 0   | 14 | 2.E-21 | No.73290 |
| A09 | BrSF0353    | 103.2       | 36 | 97  | 44 | 0   | 0   | 2  | 1.E-19 | No.73290 |
| A09 | BnSF400-54  | 103.6       | 0  | 89  | 0  | 0   | 72  | 18 | 7.E-19 | No.73290 |
| A09 | BrSF0389a   | 103.8       | 0  | 88  | 0  | 0   | 79  | 12 | 1.E-16 | No.73290 |
| A09 | BoSF0223    | 104.8       | 0  | 91  | 0  | 0   | 88  | 0  | 1.E-15 | No.73290 |
| A09 | BoSF1814    | 105.3       | 0  | 96  | 0  | 0   | 81  | 2  | 3.E-19 | No.73290 |
| A09 | BrSF0250    | 105.3       | 39 | 92  | 48 | 0   | 0   | 0  | 7.E-16 | No.73290 |

|     |            |       |    |     |    |     |     |    |        |          |
|-----|------------|-------|----|-----|----|-----|-----|----|--------|----------|
| A09 | BrSF6-2413 | 105.3 | 0  | 84  | 0  | 0   | 85  | 10 | 1.E-13 | No.73290 |
| A09 | BnID079    | 107.2 | 44 | 86  | 44 | 0   | 0   | 5  | 2.E-14 | No.73290 |
| A09 | BnID078    | 108.2 | 37 | 99  | 36 | 0   | 0   | 7  | 5.E-23 | No.73290 |
| A09 | BnID086    | 110.3 | 43 | 81  | 48 | 0   | 0   | 7  | 1.E-11 | No.73290 |
| A09 | BnID087    | 111.1 | 43 | 87  | 45 | 0   | 0   | 4  | 2.E-14 | No.73290 |
| A09 | BnID061    | 112.4 | 44 | 76  | 47 | 0   | 0   | 12 | 3.E-10 | No.73290 |
| A09 | BnID090    | 112.5 | 28 | 0   | 0  | 144 | 0   | 7  | 8.E-03 |          |
| A09 | BoSF1920a  | 112.6 | 0  | 87  | 0  | 0   | 90  | 2  | 1.E-13 | No.73290 |
| A09 | BnID063    | 113.4 | 41 | 83  | 39 | 0   | 0   | 16 | 5.E-15 | No.73290 |
| A09 | BnID094    | 114.4 | 43 | 80  | 48 | 0   | 0   | 8  | 2.E-11 | No.73290 |
| A09 | BnID062    | 114.6 | 41 | 82  | 47 | 0   | 0   | 9  | 2.E-12 | No.73290 |
| A09 | BnID085    | 116.4 | 50 | 78  | 47 | 0   | 0   | 4  | 8.E-11 | No.73290 |
| A09 | BnID095    | 117.0 | 51 | 39  | 84 | 0   | 0   | 5  | 4.E-01 |          |
| A09 | BrSF0615b  | 117.0 | 0  | 129 | 0  | 0   | 48  | 2  | 5.E-49 | No.73290 |
| A09 | BoSF0872b  | 117.0 | 0  | 114 | 0  | 0   | 47  | 18 | 4.E-41 | No.73290 |
| A09 | BrSF0229   | 118.0 | 0  | 66  | 0  | 0   | 112 | 1  | 2.E-04 | No.73290 |
| A09 | BoSF1885   | 120.7 | 27 | 0   | 0  | 142 | 0   | 10 | 7.E-03 |          |
| A09 | BoSF2104a  | 120.9 | 0  | 102 | 0  | 0   | 75  | 2  | 1.E-23 | No.73290 |
| A09 | BnEMS0337  | 121.7 | 45 | 36  | 94 | 0   | 0   | 4  | 4.E-01 |          |
| A09 | BoSF2791   | 122.4 | 0  | 131 | 0  | 0   | 46  | 2  | 3.E-51 | No.73290 |
| A09 | BrSF77-118 | 123.3 | 0  | 26  | 0  | 0   | 55  | 98 | 1.E-01 |          |
| A09 | BnID097    | 124.7 | 51 | 39  | 85 | 0   | 0   | 4  | 4.E-01 |          |
| A09 | BrSF82-562 | 125.1 | 20 | 0   | 0  | 67  | 0   | 92 | 7.E-01 |          |
| A09 | BoSF1902   | 125.8 | 34 | 50  | 92 | 0   | 0   | 3  | 2.E-01 |          |
| A09 | BrSF0261   | 125.9 | 0  | 144 | 0  | 0   | 33  | 2  | 4.E-67 | No.73290 |
| A10 | BrSF0898a  | 0.0   | 44 | 0   | 0  | 134 | 0   | 1  | 9.E-01 |          |
| A10 | BrSF0958   | 4.9   | 47 | 50  | 82 | 0   | 0   | 0  | 5.E-01 |          |
| A10 | Na10E08    | 10.6  | 38 | 42  | 62 | 0   | 0   | 37 | 3.E-01 |          |
| A10 | BrSF0436b  | 10.6  | 0  | 19  | 0  | 0   | 70  | 90 | 4.E-01 |          |
| A10 | sS2066     | 25.4  | 49 | 53  | 76 | 0   | 0   | 1  | 1.E-01 |          |
| A10 | BoSF0652   | 26.2  | 49 | 0   | 0  | 127 | 0   | 3  | 4.E-01 |          |
| A10 | BrSF0287   | 26.8  | 0  | 54  | 0  | 0   | 125 | 0  | 1.E-01 |          |
| A10 | niab140    | 26.8  | 0  | 52  | 0  | 0   | 124 | 3  | 2.E-01 |          |
| A10 | sR12384    | 30.3  | 0  | 52  | 0  | 0   | 126 | 1  | 2.E-01 |          |
| A10 | BrSF0425a  | 30.5  | 41 | 39  | 50 | 0   | 0   | 49 | 3.E-02 |          |
| A10 | BrSF0283   | 33.6  | 51 | 0   | 0  | 127 | 0   | 1  | 3.E-01 |          |
| A10 | niab122    | 36.0  | 51 | 55  | 73 | 0   | 0   | 0  | 4.E-02 |          |
| A10 | BoSF0601   | 36.7  | 0  | 54  | 0  | 0   | 122 | 3  | 8.E-02 |          |
| A10 | BrSF0415   | 37.3  | 0  | 56  | 0  | 0   | 123 | 0  | 5.E-02 |          |
| A10 | niab103    | 44.1  | 48 | 47  | 83 | 0   | 0   | 1  | 7.E-01 |          |
| A10 | BrGMS0536  | 44.9  | 40 | 42  | 74 | 0   | 0   | 23 | 8.E-01 |          |
| A10 | sN8502     | 47.2  | 23 | 23  | 42 | 0   | 0   | 91 | 9.E-01 |          |
| A10 | BoSF1808   | 48.5  | 46 | 48  | 75 | 0   | 0   | 10 | 3.E-01 |          |
| C01 | BrSF0279   | 0.0   | 0  | 46  | 0  | 0   | 133 | 0  | 8.E-01 |          |
| C01 | BoSF2670   | 4.6   | 43 | 40  | 95 | 0   | 0   | 1  | 6.E-01 |          |
| C01 | BoSF0224a  | 7.3   | 44 | 46  | 88 | 0   | 0   | 1  | 1.E+00 |          |

|     |            |       |    |    |     |     |     |    |        |               |
|-----|------------|-------|----|----|-----|-----|-----|----|--------|---------------|
| C01 | CB10587    | 11.1  | 43 | 44 | 84  | 0   | 0   | 8  | 1.E+00 |               |
| C01 | CNU139c    | 15.1  | 44 | 0  | 0   | 133 | 0   | 2  | 1.E+00 |               |
| C01 | BoSF1469   | 18.2  | 45 | 57 | 77  | 0   | 0   | 0  | 8.E-02 |               |
| C01 | BnEMS1012  | 25.9  | 0  | 46 | 0   | 0   | 127 | 6  | 6.E-01 |               |
| C01 | niab068    | 29.2  | 0  | 42 | 0   | 0   | 136 | 1  | 7.E-01 |               |
| C01 | IGF2026c   | 31.8  | 41 | 49 | 89  | 0   | 0   | 0  | 7.E-01 |               |
| C01 | BoSF0678a  | 32.0  | 40 | 49 | 90  | 0   | 0   | 0  | 6.E-01 |               |
| C01 | CB10369b   | 34.1  | 39 | 0  | 0   | 137 | 0   | 3  | 4.E-01 |               |
| C01 | BoSF0442   | 34.4  | 42 | 45 | 89  | 0   | 0   | 3  | 9.E-01 |               |
| C01 | BoSF1667   | 35.5  | 42 | 47 | 89  | 0   | 0   | 1  | 9.E-01 |               |
| C01 | BoSF1998   | 35.7  | 39 | 0  | 0   | 138 | 0   | 2  | 4.E-01 |               |
| C01 | BoGMS1565a | 41.4  | 37 | 42 | 94  | 0   | 0   | 6  | 5.E-01 |               |
| C01 | BoSF2182   | 41.4  | 35 | 47 | 94  | 0   | 0   | 3  | 3.E-01 |               |
| C01 | BoSF0130   | 48.1  | 31 | 44 | 102 | 0   | 0   | 2  | 5.E-02 |               |
| C01 | BoSF0133   | 50.8  | 35 | 42 | 99  | 0   | 0   | 3  | 2.E-01 |               |
| C01 | BoSF0114   | 59.7  | 0  | 25 | 0   | 0   | 154 | 0  | 7.E-04 | Zhongshuang11 |
| C01 | BrSF0811   | 65.1  | 0  | 45 | 0   | 0   | 133 | 1  | 9.E-01 |               |
| C01 | BoSF2314   | 68.8  | 40 | 44 | 88  | 0   | 0   | 7  | 9.E-01 |               |
| C01 | BrSF0705   | 70.8  | 42 | 0  | 0   | 133 | 0   | 4  | 8.E-01 |               |
| C01 | BoSF2346   | 70.9  | 0  | 43 | 0   | 0   | 133 | 3  | 9.E-01 |               |
| C01 | BoSF2538   | 73.3  | 39 | 0  | 0   | 128 | 0   | 12 | 6.E-01 |               |
| C01 | BoSF0050b  | 75.8  | 0  | 40 | 0   | 0   | 117 | 22 | 9.E-01 |               |
| C01 | BoSF1372   | 76.8  | 41 | 44 | 93  | 0   | 0   | 1  | 8.E-01 |               |
| C01 | BoSF2575   | 78.7  | 43 | 45 | 90  | 0   | 0   | 1  | 1.E+00 |               |
| C01 | BoSF1270   | 85.0  | 35 | 39 | 105 | 0   | 0   | 0  | 6.E-02 |               |
| C01 | ns258      | 91.3  | 58 | 0  | 0   | 121 | 0   | 0  | 2.E-02 |               |
| C01 | ns059      | 94.1  | 0  | 52 | 0   | 0   | 127 | 0  | 2.E-01 |               |
| C01 | ns262      | 94.5  | 48 | 0  | 0   | 131 | 0   | 0  | 6.E-01 |               |
| C01 | BoSF1597   | 99.1  | 30 | 0  | 0   | 148 | 0   | 1  | 1.E-02 |               |
| C01 | FITO283    | 99.5  | 30 | 0  | 0   | 147 | 0   | 2  | 1.E-02 |               |
| C01 | BoSF2820   | 102.4 | 31 | 0  | 0   | 146 | 0   | 2  | 2.E-02 |               |
| C02 | BoSF2071   | 0.0   | 0  | 58 | 0   | 0   | 120 | 1  | 2.E-02 |               |
| C02 | BoSF1799   | 1.9   | 0  | 53 | 0   | 0   | 126 | 0  | 2.E-01 |               |
| C02 | BoSF1425   | 2.4   | 0  | 53 | 0   | 0   | 125 | 1  | 1.E-01 |               |
| C02 | BnGMS0081  | 2.8   | 0  | 46 | 0   | 0   | 121 | 12 | 4.E-01 |               |
| C02 | BoSF1539   | 3.2   | 0  | 53 | 0   | 0   | 126 | 0  | 2.E-01 |               |
| C02 | BoGMS0665  | 3.8   | 30 | 43 | 75  | 0   | 0   | 31 | 3.E-01 |               |
| C02 | BoSF1017   | 4.5   | 0  | 52 | 0   | 0   | 127 | 0  | 2.E-01 |               |
| C02 | BoSF0132   | 5.1   | 34 | 53 | 89  | 0   | 0   | 3  | 1.E-01 |               |
| C02 | BoSF2604   | 5.5   | 35 | 53 | 83  | 0   | 0   | 8  | 1.E-01 |               |
| C02 | BoSF1825   | 5.8   | 0  | 48 | 0   | 0   | 113 | 18 | 2.E-01 |               |
| C02 | Ol11H09    | 5.9   | 40 | 54 | 82  | 0   | 0   | 3  | 2.E-01 |               |
| C02 | BoSF1826   | 5.9   | 0  | 55 | 0   | 0   | 117 | 7  | 3.E-02 |               |
| C02 | CNU461     | 19.4  | 39 | 43 | 96  | 0   | 0   | 1  | 5.E-01 |               |
| C02 | BoSF1264   | 28.3  | 0  | 40 | 0   | 0   | 138 | 1  | 4.E-01 |               |
| C02 | BrSF0065b  | 30.1  | 44 | 42 | 91  | 0   | 0   | 2  | 9.E-01 |               |

|     |           |       |    |    |    |     |     |    |        |               |
|-----|-----------|-------|----|----|----|-----|-----|----|--------|---------------|
| C02 | niab124   | 31.2  | 0  | 40 | 0  | 0   | 139 | 0  | 4.E-01 |               |
| C02 | BoSF2242  | 34.3  | 0  | 40 | 0  | 0   | 139 | 0  | 4.E-01 |               |
| C02 | snap0674  | 36.2  | 0  | 40 | 0  | 0   | 138 | 1  | 4.E-01 |               |
| C02 | snap0673  | 39.1  | 0  | 48 | 0  | 0   | 131 | 0  | 6.E-01 |               |
| C02 | BoSF0033a | 41.4  | 44 | 30 | 98 | 0   | 0   | 7  | 6.E-02 |               |
| C02 | BoSF2475  | 52.1  | 0  | 42 | 0  | 0   | 137 | 0  | 6.E-01 |               |
| C02 | BoSF0880  | 57.4  | 45 | 0  | 0  | 134 | 0   | 0  | 1.E+00 |               |
| C02 | BnEMS0959 | 57.9  | 43 | 35 | 98 | 0   | 0   | 3  | 2.E-01 |               |
| C02 | CB10026   | 61.5  | 48 | 37 | 88 | 0   | 0   | 6  | 5.E-01 |               |
| C02 | BoSF0096  | 64.6  | 51 | 37 | 88 | 0   | 0   | 3  | 3.E-01 |               |
| C02 | BoSF0757  | 66.2  | 52 | 34 | 91 | 0   | 0   | 2  | 1.E-01 |               |
| C02 | BoSF0525b | 66.6  | 54 | 0  | 0  | 125 | 0   | 0  | 1.E-01 |               |
| C02 | BoSF1743  | 67.0  | 53 | 38 | 86 | 0   | 0   | 2  | 3.E-01 |               |
| C02 | BoSF0284  | 74.9  | 48 | 34 | 95 | 0   | 0   | 2  | 2.E-01 |               |
| C02 | BoSF1995a | 84.4  | 22 | 21 | 45 | 0   | 0   | 91 | 1.E+00 |               |
| C02 | ns314     | 90.6  | 0  | 56 | 0  | 0   | 123 | 0  | 5.E-02 |               |
| C02 | ns085     | 96.9  | 0  | 38 | 0  | 0   | 141 | 0  | 2.E-01 |               |
| C02 | MD038     | 100.8 | 65 | 0  | 0  | 114 | 0   | 0  | 5.E-04 | Zhongshuang11 |
| C02 | BrSF0503  | 107.6 | 61 | 38 | 79 | 0   | 0   | 1  | 2.E-02 |               |
| C02 | BoSF0310  | 110.0 | 57 | 0  | 0  | 120 | 0   | 2  | 3.E-02 |               |
| C02 | BoGMS2128 | 111.2 | 46 | 28 | 73 | 0   | 0   | 32 | 1.E-01 |               |
| C02 | BoSF1258  | 112.2 | 58 | 37 | 84 | 0   | 0   | 0  | 6.E-02 |               |
| C02 | BoSF2269  | 113.7 | 56 | 32 | 82 | 0   | 0   | 9  | 3.E-02 |               |
| C03 | BoSF2181  | 0.0   | 52 | 47 | 77 | 0   | 0   | 3  | 2.E-01 |               |
| C03 | sR12137   | 4.5   | 54 | 42 | 83 | 0   | 0   | 0  | 3.E-01 |               |
| C03 | BoSF1005  | 6.5   | 0  | 43 | 0  | 0   | 134 | 2  | 8.E-01 |               |
| C03 | BoSF1977  | 7.5   | 0  | 48 | 0  | 0   | 130 | 1  | 5.E-01 |               |
| C03 | BoGMS0707 | 8.5   | 50 | 38 | 73 | 0   | 0   | 18 | 2.E-01 |               |
| C03 | BRMS006   | 8.9   | 0  | 41 | 0  | 0   | 131 | 7  | 7.E-01 |               |
| C03 | BoSF1944  | 9.5   | 0  | 42 | 0  | 0   | 133 | 4  | 8.E-01 |               |
| C03 | BoSF0421  | 9.7   | 0  | 42 | 0  | 0   | 131 | 6  | 8.E-01 |               |
| C03 | niab077   | 9.9   | 0  | 46 | 0  | 0   | 132 | 1  | 8.E-01 |               |
| C03 | BoSF2263  | 10.4  | 49 | 44 | 79 | 0   | 0   | 7  | 5.E-01 |               |
| C03 | niab115b  | 10.8  | 48 | 0  | 0  | 130 | 0   | 1  | 5.E-01 |               |
| C03 | BoSF2861  | 12.4  | 52 | 0  | 0  | 126 | 0   | 1  | 2.E-01 |               |
| C03 | BoSF1510  | 13.0  | 52 | 0  | 0  | 127 | 0   | 0  | 2.E-01 |               |
| C03 | BoGMS0407 | 17.3  | 47 | 45 | 81 | 0   | 0   | 6  | 7.E-01 |               |
| C03 | BoSF0371  | 18.8  | 0  | 46 | 0  | 0   | 131 | 2  | 8.E-01 |               |
| C03 | BoSF1970  | 25.5  | 58 | 41 | 76 | 0   | 0   | 4  | 4.E-02 |               |
| C03 | BoSF2392b | 30.5  | 0  | 53 | 0  | 0   | 123 | 3  | 1.E-01 |               |
| C03 | BoSF2006  | 32.0  | 46 | 49 | 79 | 0   | 0   | 5  | 5.E-01 |               |
| C03 | BoSF2005  | 32.2  | 0  | 48 | 0  | 0   | 128 | 3  | 5.E-01 |               |
| C03 | BoGMS0678 | 34.8  | 49 | 50 | 77 | 0   | 0   | 3  | 3.E-01 |               |
| C03 | BnID035a  | 35.8  | 47 | 0  | 0  | 127 | 0   | 5  | 5.E-01 |               |
| C03 | FITO218   | 38.8  | 0  | 45 | 0  | 0   | 133 | 1  | 9.E-01 |               |
| C03 | BoSF0466  | 39.3  | 45 | 45 | 86 | 0   | 0   | 3  | 1.E+00 |               |

|     |           |       |    |    |    |     |     |    |        |
|-----|-----------|-------|----|----|----|-----|-----|----|--------|
| C03 | BrBAC087b | 42.2  | 49 | 47 | 82 | 0   | 0   | 1  | 6.E-01 |
| C03 | BoSF2132  | 42.8  | 47 | 45 | 86 | 0   | 0   | 1  | 9.E-01 |
| C03 | BrSF0845b | 43.3  | 49 | 0  | 0  | 128 | 0   | 2  | 4.E-01 |
| C03 | BN12A     | 43.3  | 0  | 45 | 0  | 0   | 130 | 4  | 8.E-01 |
| C03 | CB10569   | 43.7  | 46 | 0  | 0  | 131 | 0   | 2  | 8.E-01 |
| C03 | BoSF0805  | 44.7  | 44 | 45 | 87 | 0   | 0   | 3  | 1.E+00 |
| C03 | CB10235   | 48.4  | 42 | 41 | 83 | 0   | 0   | 13 | 1.E+00 |
| C03 | BoSF2258  | 49.5  | 44 | 0  | 0  | 131 | 0   | 4  | 1.E+00 |
| C03 | BoSF2284  | 51.2  | 40 | 47 | 90 | 0   | 0   | 2  | 7.E-01 |
| C03 | BrSF0299  | 54.7  | 47 | 0  | 0  | 121 | 0   | 11 | 4.E-01 |
| C03 | ns027b    | 56.1  | 41 | 47 | 85 | 0   | 0   | 6  | 8.E-01 |
| C03 | Na12E02b  | 56.6  | 0  | 51 | 0  | 0   | 126 | 2  | 2.E-01 |
| C03 | BoSF0670  | 58.1  | 39 | 48 | 86 | 0   | 0   | 6  | 6.E-01 |
| C03 | OI10E05   | 59.7  | 37 | 50 | 80 | 0   | 0   | 12 | 3.E-01 |
| C03 | BoSF1271b | 61.4  | 38 | 57 | 84 | 0   | 0   | 0  | 9.E-02 |
| C03 | BoSF1276  | 63.8  | 36 | 58 | 82 | 0   | 0   | 3  | 4.E-02 |
| C03 | BoSF0840  | 66.1  | 36 | 56 | 78 | 0   | 0   | 9  | 5.E-02 |
| C03 | snap0622  | 67.0  | 40 | 0  | 0  | 139 | 0   | 0  | 4.E-01 |
| C03 | BoSF0160  | 73.2  | 36 | 49 | 93 | 0   | 0   | 1  | 3.E-01 |
| C03 | BoSF0402  | 74.1  | 0  | 50 | 0  | 0   | 128 | 1  | 3.E-01 |
| C03 | BoSF1911  | 74.8  | 34 | 0  | 0  | 145 | 0   | 0  | 6.E-02 |
| C03 | BoSF2669  | 75.6  | 34 | 45 | 92 | 0   | 0   | 8  | 3.E-01 |
| C03 | BoSF0883  | 76.8  | 36 | 50 | 92 | 0   | 0   | 1  | 3.E-01 |
| C03 | Na12G05   | 78.0  | 0  | 61 | 0  | 0   | 115 | 3  | 3.E-03 |
| C03 | BrGMS2766 | 79.3  | 35 | 40 | 77 | 0   | 0   | 27 | 8.E-01 |
| C03 | CB10057   | 81.3  | 34 | 39 | 90 | 0   | 0   | 16 | 4.E-01 |
| C03 | BoGMS0369 | 82.6  | 0  | 43 | 0  | 0   | 119 | 17 | 7.E-01 |
| C03 | snap0260  | 84.8  | 0  | 60 | 0  | 0   | 119 | 0  | 8.E-03 |
| C03 | BoSF2281  | 92.1  | 0  | 46 | 0  | 0   | 129 | 4  | 7.E-01 |
| C03 | Na10E02   | 93.4  | 0  | 47 | 0  | 0   | 127 | 5  | 5.E-01 |
| C03 | BoSF2723a | 97.1  | 47 | 41 | 82 | 0   | 0   | 9  | 7.E-01 |
| C03 | BoSF0711b | 104.8 | 41 | 40 | 90 | 0   | 0   | 8  | 8.E-01 |
| C03 | BoSF2510  | 107.2 | 44 | 41 | 92 | 0   | 0   | 2  | 8.E-01 |
| C03 | BoSF2509  | 108.7 | 42 | 0  | 0  | 135 | 0   | 2  | 7.E-01 |
| C03 | BoSF2754  | 109.4 | 43 | 41 | 95 | 0   | 0   | 0  | 7.E-01 |
| C03 | CALSSR    | 109.4 | 40 | 0  | 0  | 131 | 0   | 8  | 6.E-01 |
| C03 | BoSF2233  | 109.4 | 43 | 40 | 95 | 0   | 0   | 1  | 6.E-01 |
| C03 | BoSF2821  | 109.6 | 44 | 40 | 94 | 0   | 0   | 1  | 7.E-01 |
| C03 | BoSF0176  | 110.5 | 0  | 40 | 0  | 0   | 137 | 2  | 5.E-01 |
| C03 | BoGMS0819 | 112.1 | 41 | 40 | 86 | 0   | 0   | 12 | 9.E-01 |
| C03 | BoSF0926a | 113.7 | 45 | 0  | 0  | 133 | 0   | 1  | 9.E-01 |
| C03 | BrSF0193  | 116.3 | 41 | 0  | 0  | 137 | 0   | 1  | 5.E-01 |
| C03 | BRAS068   | 120.9 | 43 | 42 | 92 | 0   | 0   | 2  | 9.E-01 |
| C03 | OI13C12   | 121.8 | 38 | 43 | 89 | 0   | 0   | 9  | 7.E-01 |
| C03 | MR049     | 123.3 | 43 | 43 | 92 | 0   | 0   | 1  | 9.E-01 |
| C03 | BoSF0960  | 130.2 | 0  | 38 | 0  | 0   | 138 | 3  | 3.E-01 |

|     |           |       |    |    |    |     |     |    |        |
|-----|-----------|-------|----|----|----|-----|-----|----|--------|
| C03 | snap0833  | 134.0 | 0  | 40 | 0  | 0   | 135 | 4  | 5.E-01 |
| C03 | BoSF2513  | 135.7 | 0  | 14 | 0  | 0   | 76  | 89 | 4.E-02 |
| C03 | BrSF0869  | 138.8 | 0  | 34 | 0  | 0   | 138 | 7  | 1.E-01 |
| C03 | BoSF1650  | 140.4 | 0  | 39 | 0  | 0   | 140 | 0  | 3.E-01 |
| C03 | BoSF1136  | 144.4 | 0  | 42 | 0  | 0   | 137 | 0  | 6.E-01 |
| C03 | BrSF0214  | 148.7 | 37 | 0  | 0  | 142 | 0   | 0  | 2.E-01 |
| C04 | snap1060  | 0.0   | 59 | 0  | 0  | 120 | 0   | 0  | 1.E-02 |
| C04 | BoSF1319  | 6.0   | 46 | 47 | 85 | 0   | 0   | 1  | 8.E-01 |
| C04 | BrSF0313  | 9.8   | 40 | 0  | 0  | 132 | 0   | 7  | 6.E-01 |
| C04 | BoSF2273  | 15.3  | 45 | 48 | 84 | 0   | 0   | 2  | 8.E-01 |
| C04 | BoSF0349  | 17.2  | 49 | 48 | 81 | 0   | 0   | 1  | 5.E-01 |
| C04 | BoSF1492  | 17.6  | 47 | 48 | 80 | 0   | 0   | 4  | 5.E-01 |
| C04 | CNU286    | 20.7  | 43 | 0  | 0  | 135 | 0   | 1  | 8.E-01 |
| C04 | BoSF0643  | 20.7  | 42 | 0  | 0  | 133 | 0   | 4  | 8.E-01 |
| C04 | FITO366   | 21.3  | 42 | 0  | 0  | 137 | 0   | 0  | 6.E-01 |
| C04 | BoSF0016  | 21.9  | 41 | 45 | 91 | 0   | 0   | 2  | 9.E-01 |
| C04 | BoGMS1219 | 23.4  | 41 | 39 | 91 | 0   | 0   | 8  | 7.E-01 |
| C04 | BoSF1271a | 24.6  | 38 | 48 | 90 | 0   | 0   | 3  | 5.E-01 |
| C04 | BoSF0318  | 25.6  | 36 | 48 | 94 | 0   | 0   | 1  | 3.E-01 |
| C04 | BnEMS0038 | 28.3  | 32 | 41 | 75 | 0   | 0   | 31 | 6.E-01 |
| C04 | BoSF1722  | 29.6  | 40 | 0  | 0  | 138 | 0   | 1  | 4.E-01 |
| C04 | niab002   | 30.3  | 38 | 0  | 0  | 141 | 0   | 0  | 2.E-01 |
| C04 | snap0205  | 40.5  | 0  | 53 | 0  | 0   | 126 | 0  | 2.E-01 |
| C04 | snap1299  | 42.5  | 50 | 0  | 0  | 127 | 0   | 2  | 3.E-01 |
| C04 | snap1891  | 45.0  | 33 | 0  | 0  | 146 | 0   | 0  | 4.E-02 |
| C04 | BoSF2018  | 45.8  | 38 | 56 | 82 | 0   | 0   | 3  | 1.E-01 |
| C04 | MR119     | 47.5  | 38 | 53 | 85 | 0   | 0   | 3  | 3.E-01 |
| C04 | BoSF2723b | 47.9  | 0  | 52 | 0  | 0   | 123 | 4  | 1.E-01 |
| C04 | BoSF2106  | 52.3  | 37 | 42 | 99 | 0   | 0   | 1  | 3.E-01 |
| C04 | BoSF2884  | 53.6  | 38 | 0  | 0  | 139 | 0   | 2  | 3.E-01 |
| C04 | BoSF0952a | 53.8  | 41 | 0  | 0  | 138 | 0   | 0  | 5.E-01 |
| C04 | BoSF1336  | 54.1  | 0  | 40 | 0  | 0   | 137 | 2  | 5.E-01 |
| C04 | BoSF0997  | 54.8  | 37 | 44 | 91 | 0   | 0   | 7  | 6.E-01 |
| C04 | CB10428   | 54.9  | 0  | 45 | 0  | 0   | 134 | 0  | 1.E+00 |
| C04 | BoSF0552  | 55.4  | 39 | 0  | 0  | 138 | 0   | 2  | 4.E-01 |
| C04 | BoSF2040  | 55.6  | 38 | 43 | 98 | 0   | 0   | 0  | 4.E-01 |
| C04 | BoSF1852  | 55.8  | 0  | 40 | 0  | 0   | 139 | 0  | 4.E-01 |
| C04 | BoSF2062  | 56.0  | 0  | 39 | 0  | 0   | 133 | 7  | 5.E-01 |
| C04 | IPLP013   | 56.1  | 0  | 16 | 0  | 0   | 74  | 89 | 1.E-01 |
| C04 | BoSF0718  | 56.2  | 39 | 42 | 94 | 0   | 0   | 4  | 6.E-01 |
| C04 | BoSF0600  | 56.2  | 0  | 42 | 0  | 0   | 134 | 3  | 7.E-01 |
| C04 | BoSF1843  | 56.2  | 0  | 42 | 0  | 0   | 135 | 2  | 7.E-01 |
| C04 | BoSF0592  | 56.3  | 37 | 42 | 96 | 0   | 0   | 4  | 4.E-01 |
| C04 | BrSF0552  | 56.7  | 0  | 36 | 0  | 0   | 136 | 7  | 2.E-01 |
| C04 | BoSF0949  | 56.7  | 38 | 0  | 0  | 141 | 0   | 0  | 2.E-01 |
| C04 | BoSF1121  | 56.9  | 39 | 40 | 97 | 0   | 0   | 3  | 4.E-01 |

|     |            |       |    |    |    |     |     |    |        |  |
|-----|------------|-------|----|----|----|-----|-----|----|--------|--|
| C04 | BoSF0943   | 57.3  | 38 | 0  | 0  | 139 | 0   | 2  | 3.E-01 |  |
| C04 | BoGMS2091  | 58.2  | 37 | 39 | 93 | 0   | 0   | 10 | 4.E-01 |  |
| C04 | BRAS061    | 59.0  | 0  | 41 | 0  | 0   | 137 | 1  | 5.E-01 |  |
| C04 | BoSF1692   | 62.2  | 36 | 42 | 99 | 0   | 0   | 2  | 2.E-01 |  |
| C04 | BoSF2872   | 69.5  | 36 | 50 | 91 | 0   | 0   | 2  | 3.E-01 |  |
| C04 | BoSF0495   | 69.8  | 0  | 49 | 0  | 0   | 128 | 2  | 4.E-01 |  |
| C04 | BoSF0935   | 70.2  | 0  | 49 | 0  | 0   | 128 | 2  | 4.E-01 |  |
| C04 | sN464      | 70.5  | 0  | 48 | 0  | 0   | 131 | 0  | 6.E-01 |  |
| C04 | BoGMS1031  | 71.0  | 34 | 42 | 84 | 0   | 0   | 19 | 5.E-01 |  |
| C04 | BoSF0613   | 71.7  | 0  | 53 | 0  | 0   | 125 | 1  | 1.E-01 |  |
| C04 | ns104      | 73.8  | 0  | 52 | 0  | 0   | 125 | 2  | 2.E-01 |  |
| C04 | BoGMS0282  | 76.8  | 35 | 44 | 80 | 0   | 0   | 20 | 6.E-01 |  |
| C04 | snap0299   | 80.2  | 0  | 63 | 0  | 0   | 115 | 1  | 1.E-03 |  |
| C04 | BoSF2508   | 81.9  | 31 | 53 | 92 | 0   | 0   | 3  | 5.E-02 |  |
| C04 | BoSF2294   | 84.4  | 0  | 47 | 0  | 0   | 128 | 4  | 6.E-01 |  |
| C04 | BoSF0955   | 84.7  | 37 | 0  | 0  | 142 | 0   | 0  | 2.E-01 |  |
| C04 | BoSF2666   | 86.3  | 32 | 52 | 92 | 0   | 0   | 3  | 9.E-02 |  |
| C04 | ns123      | 89.8  | 0  | 55 | 0  | 0   | 124 | 0  | 8.E-02 |  |
| C04 | ns120      | 91.9  | 0  | 58 | 0  | 0   | 120 | 1  | 2.E-02 |  |
| C04 | ns126      | 94.8  | 0  | 54 | 0  | 0   | 125 | 0  | 1.E-01 |  |
| C04 | BnGMS0160b | 105.1 | 0  | 47 | 0  | 0   | 113 | 19 | 2.E-01 |  |
| C04 | snap1360   | 110.4 | 0  | 53 | 0  | 0   | 122 | 4  | 1.E-01 |  |
| C04 | BoSF2838   | 110.6 | 32 | 48 | 94 | 0   | 0   | 5  | 1.E-01 |  |
| C04 | Ol11H02    | 113.0 | 30 | 50 | 94 | 0   | 0   | 5  | 6.E-02 |  |
| C04 | MR155      | 116.7 | 31 | 53 | 92 | 0   | 0   | 3  | 5.E-02 |  |
| C04 | BoSF1009   | 118.9 | 36 | 51 | 90 | 0   | 0   | 2  | 3.E-01 |  |
| C04 | BoSF1937   | 123.4 | 0  | 59 | 0  | 0   | 120 | 0  | 1.E-02 |  |
| C05 | BnEMS1131  | 0.0   | 44 | 43 | 90 | 0   | 0   | 2  | 1.E+00 |  |
| C05 | sORH13     | 5.4   | 46 | 43 | 87 | 0   | 0   | 3  | 9.E-01 |  |
| C05 | BoSF2552   | 8.6   | 42 | 0  | 0  | 134 | 0   | 3  | 7.E-01 |  |
| C05 | BoSF0017   | 10.3  | 45 | 40 | 89 | 0   | 0   | 5  | 8.E-01 |  |
| C05 | BoSF2607   | 11.8  | 40 | 0  | 0  | 118 | 0   | 21 | 9.E-01 |  |
| C05 | BoSF1212a  | 13.1  | 28 | 25 | 36 | 0   | 0   | 90 | 2.E-01 |  |
| C05 | BoSF2676   | 24.2  | 46 | 40 | 89 | 0   | 0   | 4  | 8.E-01 |  |
| C05 | BoGMS2688  | 26.7  | 42 | 32 | 85 | 0   | 0   | 20 | 4.E-01 |  |
| C05 | BoSF1663   | 30.7  | 43 | 0  | 0  | 132 | 0   | 4  | 9.E-01 |  |
| C05 | BoSF0022b  | 32.0  | 43 | 39 | 96 | 0   | 0   | 1  | 5.E-01 |  |
| C05 | CB10374    | 39.3  | 46 | 0  | 0  | 128 | 0   | 5  | 7.E-01 |  |
| C05 | BoSF0230   | 43.7  | 0  | 35 | 0  | 0   | 144 | 0  | 9.E-02 |  |
| C05 | Na12C01    | 50.4  | 53 | 33 | 87 | 0   | 0   | 6  | 1.E-01 |  |
| C05 | BrSF0858a  | 50.8  | 51 | 0  | 0  | 118 | 0   | 10 | 1.E-01 |  |
| C05 | BoSF1969   | 52.0  | 54 | 33 | 91 | 0   | 0   | 1  | 8.E-02 |  |
| C05 | BoSF2019   | 52.5  | 54 | 33 | 88 | 0   | 0   | 4  | 8.E-02 |  |
| C05 | ns033      | 57.3  | 0  | 37 | 0  | 0   | 142 | 0  | 2.E-01 |  |
| C05 | BoSF1918   | 58.3  | 51 | 0  | 0  | 128 | 0   | 0  | 3.E-01 |  |
| C05 | BoSF0222   | 58.5  | 0  | 36 | 0  | 0   | 140 | 3  | 2.E-01 |  |

|     |             |       |    |    |     |     |     |    |        |
|-----|-------------|-------|----|----|-----|-----|-----|----|--------|
| C05 | sS2129      | 59.2  | 52 | 37 | 87  | 0   | 0   | 3  | 3.E-01 |
| C05 | Na10D11     | 59.7  | 49 | 33 | 82  | 0   | 0   | 15 | 2.E-01 |
| C05 | sS2131      | 60.0  | 54 | 38 | 86  | 0   | 0   | 1  | 2.E-01 |
| C05 | CB10170     | 61.0  | 54 | 37 | 87  | 0   | 0   | 1  | 2.E-01 |
| C05 | BrSF0040    | 65.6  | 52 | 35 | 90  | 0   | 0   | 2  | 2.E-01 |
| C05 | BoSF0926b   | 66.6  | 0  | 35 | 0   | 0   | 143 | 1  | 1.E-01 |
| C05 | BRAS040     | 67.3  | 51 | 36 | 87  | 0   | 0   | 5  | 3.E-01 |
| C06 | ns337       | 0.0   | 42 | 0  | 0   | 137 | 0   | 0  | 6.E-01 |
| C06 | ns326       | 7.0   | 42 | 0  | 0   | 137 | 0   | 0  | 6.E-01 |
| C06 | BoSF0455b   | 16.0  | 42 | 0  | 0   | 133 | 0   | 4  | 8.E-01 |
| C06 | BoSF0733    | 16.0  | 0  | 45 | 0   | 0   | 132 | 2  | 9.E-01 |
| C06 | BoSF1665    | 16.5  | 13 | 27 | 46  | 0   | 0   | 93 | 8.E-02 |
| C06 | BoSF2316    | 17.7  | 44 | 0  | 0   | 135 | 0   | 0  | 9.E-01 |
| C06 | snap0695b   | 30.3  | 47 | 0  | 0   | 124 | 0   | 8  | 5.E-01 |
| C06 | BoSF0513    | 35.1  | 45 | 0  | 0   | 133 | 0   | 1  | 9.E-01 |
| C06 | BoSF2395    | 35.6  | 44 | 0  | 0   | 135 | 0   | 0  | 9.E-01 |
| C06 | BoSF1365    | 38.1  | 43 | 0  | 0   | 135 | 0   | 1  | 8.E-01 |
| C06 | snap1395    | 41.8  | 46 | 0  | 0   | 128 | 0   | 5  | 7.E-01 |
| C06 | Na12E01b    | 42.8  | 0  | 30 | 0   | 0   | 145 | 4  | 2.E-02 |
| C06 | snap1392    | 45.6  | 42 | 0  | 0   | 136 | 0   | 1  | 7.E-01 |
| C06 | BoSF0952b   | 48.7  | 56 | 0  | 0   | 114 | 0   | 9  | 2.E-02 |
| C06 | MR133.1     | 50.2  | 0  | 31 | 0   | 0   | 143 | 5  | 3.E-02 |
| C06 | BrSF0784    | 51.5  | 0  | 32 | 0   | 0   | 146 | 1  | 3.E-02 |
| C06 | BoSF2507    | 52.6  | 45 | 32 | 94  | 0   | 0   | 8  | 2.E-01 |
| C06 | BoSF1254    | 53.2  | 44 | 0  | 0   | 135 | 0   | 0  | 9.E-01 |
| C06 | BoSF2506    | 54.5  | 44 | 39 | 91  | 0   | 0   | 5  | 7.E-01 |
| C06 | BoSF0760    | 55.8  | 43 | 0  | 0   | 133 | 0   | 3  | 9.E-01 |
| C06 | BoSF1126    | 60.0  | 0  | 36 | 0   | 0   | 142 | 1  | 1.E-01 |
| C06 | BoSF2591    | 62.1  | 48 | 0  | 0   | 130 | 0   | 1  | 5.E-01 |
| C06 | sR12387     | 76.0  | 37 | 0  | 0   | 134 | 0   | 8  | 3.E-01 |
| C06 | BoSF1406    | 76.3  | 18 | 0  | 0   | 71  | 0   | 90 | 3.E-01 |
| C06 | BoSF1144    | 76.9  | 39 | 46 | 94  | 0   | 0   | 0  | 6.E-01 |
| C06 | BoSF1468    | 77.7  | 38 | 48 | 93  | 0   | 0   | 0  | 5.E-01 |
| C06 | BoSF1951    | 82.6  | 0  | 46 | 0   | 0   | 132 | 1  | 8.E-01 |
| C06 | BnEMS0350   | 85.1  | 0  | 49 | 0   | 0   | 124 | 6  | 3.E-01 |
| C06 | CNU331a     | 93.7  | 40 | 0  | 0   | 128 | 0   | 11 | 7.E-01 |
| C06 | Na10C06     | 99.6  | 48 | 0  | 0   | 131 | 0   | 0  | 6.E-01 |
| C06 | ns347       | 109.7 | 0  | 56 | 0   | 0   | 123 | 0  | 5.E-02 |
| C07 | CB10534     | 0.0   | 42 | 44 | 93  | 0   | 0   | 0  | 9.E-01 |
| C07 | BoSF0778    | 8.2   | 40 | 37 | 101 | 0   | 0   | 1  | 2.E-01 |
| C07 | BoSF2740    | 10.5  | 37 | 39 | 102 | 0   | 0   | 1  | 1.E-01 |
| C07 | BoSF2771    | 11.9  | 36 | 37 | 103 | 0   | 0   | 3  | 8.E-02 |
| C07 | BoSF1559    | 14.6  | 0  | 39 | 0   | 0   | 140 | 0  | 3.E-01 |
| C07 | BoSF1324    | 18.4  | 0  | 44 | 0   | 0   | 135 | 0  | 9.E-01 |
| C07 | BoSF0783b   | 20.3  | 22 | 17 | 50  | 0   | 0   | 90 | 4.E-01 |
| C07 | BrSF46-176b | 32.1  | 0  | 37 | 0   | 0   | 125 | 17 | 5.E-01 |

|     |             |       |    |    |     |     |     |    |        |
|-----|-------------|-------|----|----|-----|-----|-----|----|--------|
| C08 | ns067       | 0.0   | 0  | 60 | 0   | 0   | 117 | 2  | 6.E-03 |
| C08 | BoGMS1419   | 10.8  | 38 | 48 | 86  | 0   | 0   | 7  | 6.E-01 |
| C08 | BoSF0521    | 13.6  | 35 | 40 | 101 | 0   | 0   | 3  | 1.E-01 |
| C08 | BoSF0586a   | 16.9  | 34 | 51 | 93  | 0   | 0   | 1  | 2.E-01 |
| C08 | BoGMS0456   | 17.5  | 34 | 44 | 81  | 0   | 0   | 20 | 5.E-01 |
| C08 | BoSF2274    | 18.8  | 34 | 50 | 94  | 0   | 0   | 1  | 2.E-01 |
| C08 | BoSF2646    | 19.4  | 33 | 49 | 93  | 0   | 0   | 4  | 2.E-01 |
| C08 | CB10053     | 19.9  | 35 | 49 | 95  | 0   | 0   | 0  | 2.E-01 |
| C08 | BoSF1481    | 20.4  | 0  | 46 | 0   | 0   | 130 | 3  | 7.E-01 |
| C08 | BoSF0554    | 21.8  | 0  | 47 | 0   | 0   | 127 | 5  | 5.E-01 |
| C08 | BoSF2163    | 26.7  | 0  | 51 | 0   | 0   | 128 | 0  | 3.E-01 |
| C08 | BoSF2482    | 31.5  | 0  | 50 | 0   | 0   | 129 | 0  | 4.E-01 |
| C08 | BnGMS0509   | 32.8  | 30 | 53 | 86  | 0   | 0   | 10 | 4.E-02 |
| C08 | snap1382    | 36.2  | 0  | 62 | 0   | 0   | 117 | 0  | 3.E-03 |
| C08 | BoSF2378    | 37.2  | 0  | 47 | 0   | 0   | 130 | 2  | 6.E-01 |
| C08 | BoSF0023    | 38.5  | 33 | 48 | 97  | 0   | 0   | 1  | 1.E-01 |
| C08 | BoSF2290    | 43.5  | 29 | 47 | 97  | 0   | 0   | 6  | 4.E-02 |
| C08 | BnEMS0020   | 53.4  | 36 | 37 | 90  | 0   | 0   | 16 | 4.E-01 |
| C08 | BoSF1926    | 56.8  | 32 | 44 | 102 | 0   | 0   | 1  | 7.E-02 |
| C08 | BoSF2347    | 66.2  | 33 | 48 | 93  | 0   | 0   | 5  | 2.E-01 |
| C08 | BoSF2751    | 67.9  | 34 | 42 | 96  | 0   | 0   | 7  | 2.E-01 |
| C08 | BoSF2616    | 73.4  | 40 | 47 | 92  | 0   | 0   | 0  | 7.E-01 |
| C08 | BoSF1222    | 74.8  | 41 | 46 | 92  | 0   | 0   | 0  | 8.E-01 |
| C08 | BnSF287-186 | 80.6  | 34 | 55 | 80  | 0   | 0   | 10 | 6.E-02 |
| C08 | niab129     | 81.5  | 37 | 51 | 86  | 0   | 0   | 5  | 3.E-01 |
| C08 | BrSF0356    | 82.7  | 39 | 50 | 90  | 0   | 0   | 0  | 5.E-01 |
| C08 | BrGMS0447   | 82.7  | 36 | 45 | 95  | 0   | 0   | 3  | 4.E-01 |
| C08 | CB10179     | 85.3  | 41 | 50 | 84  | 0   | 0   | 4  | 5.E-01 |
| C08 | IFLP021     | 92.1  | 32 | 52 | 95  | 0   | 0   | 0  | 8.E-02 |
| C08 | BoSF0365    | 93.8  | 36 | 49 | 92  | 0   | 0   | 2  | 3.E-01 |
| C08 | BnEMS1070   | 95.3  | 29 | 49 | 91  | 0   | 0   | 10 | 6.E-02 |
| C08 | BoSF1064    | 98.2  | 31 | 47 | 98  | 0   | 0   | 3  | 7.E-02 |
| C08 | BoSF0448    | 98.5  | 0  | 48 | 0   | 0   | 130 | 1  | 5.E-01 |
| C08 | BoSF2073    | 101.0 | 33 | 44 | 101 | 0   | 0   | 1  | 1.E-01 |
| C08 | BnEMS0606   | 103.8 | 29 | 45 | 92  | 0   | 0   | 13 | 8.E-02 |
| C08 | sR5795      | 105.8 | 31 | 51 | 96  | 0   | 0   | 1  | 6.E-02 |
| C08 | BoSF1920b   | 107.2 | 0  | 55 | 0   | 0   | 123 | 1  | 7.E-02 |
| C08 | BN26A       | 107.2 | 33 | 0  | 0   | 144 | 0   | 2  | 5.E-02 |
| C08 | BrSF0549a   | 108.0 | 0  | 51 | 0   | 0   | 127 | 1  | 3.E-01 |
| C08 | CB10092     | 111.9 | 28 | 53 | 97  | 0   | 0   | 1  | 1.E-02 |
| C08 | CB10028     | 112.2 | 25 | 52 | 99  | 0   | 0   | 3  | 4.E-03 |
| C08 | BrSF53-712  | 115.6 | 0  | 52 | 0   | 0   | 121 | 6  | 1.E-01 |
| C09 | BoSF0980    | 0.0   | 52 | 48 | 72  | 0   | 0   | 7  | 9.E-02 |
| C09 | BoSF0336b   | 3.4   | 46 | 43 | 68  | 0   | 0   | 22 | 2.E-01 |
| C09 | BrSF54-590  | 4.6   | 50 | 0  | 0   | 97  | 0   | 32 | 1.E-02 |
| C09 | BoSF2578    | 5.8   | 0  | 48 | 0   | 0   | 131 | 0  | 6.E-01 |

|     |           |      |    |    |    |     |     |    |        |  |
|-----|-----------|------|----|----|----|-----|-----|----|--------|--|
| C09 | BoSF0948  | 8.8  | 0  | 51 | 0  | 0   | 125 | 3  | 2.E-01 |  |
| C09 | BnGMS0213 | 9.8  | 54 | 47 | 78 | 0   | 0   | 0  | 2.E-01 |  |
| C09 | BoSF2398  | 11.2 | 56 | 45 | 69 | 0   | 0   | 9  | 2.E-02 |  |
| C09 | BoSF1228  | 12.5 | 51 | 47 | 80 | 0   | 0   | 1  | 4.E-01 |  |
| C09 | BoSF1976  | 12.9 | 53 | 49 | 77 | 0   | 0   | 0  | 2.E-01 |  |
| C09 | BoSF2748  | 13.6 | 0  | 45 | 0  | 0   | 122 | 12 | 6.E-01 |  |
| C09 | BoSF1872  | 14.0 | 51 | 49 | 77 | 0   | 0   | 2  | 2.E-01 |  |
| C09 | BoSF1810  | 15.9 | 52 | 47 | 79 | 0   | 0   | 1  | 3.E-01 |  |
| C09 | BrSF1008  | 16.8 | 49 | 0  | 0  | 130 | 0   | 0  | 5.E-01 |  |
| C09 | BoGMS1561 | 17.1 | 0  | 48 | 0  | 0   | 119 | 12 | 3.E-01 |  |
| C09 | BoSF1788  | 17.1 | 0  | 50 | 0  | 0   | 127 | 2  | 3.E-01 |  |
| C09 | BoSF1817  | 18.1 | 41 | 49 | 81 | 0   | 0   | 8  | 5.E-01 |  |
| C09 | BoGMS1453 | 20.5 | 40 | 44 | 75 | 0   | 0   | 20 | 7.E-01 |  |
| C09 | BoSF0040  | 20.5 | 43 | 50 | 85 | 0   | 0   | 1  | 6.E-01 |  |
| C09 | BoSF1647  | 22.4 | 0  | 45 | 0  | 0   | 131 | 3  | 9.E-01 |  |
| C09 | BoSF2393  | 22.8 | 39 | 45 | 80 | 0   | 0   | 15 | 8.E-01 |  |
| C09 | BoSF2774  | 23.6 | 46 | 0  | 0  | 127 | 0   | 6  | 6.E-01 |  |
| C09 | BrSF0436a | 24.1 | 45 | 49 | 85 | 0   | 0   | 0  | 7.E-01 |  |
| C09 | OI12A04   | 38.4 | 0  | 42 | 0  | 0   | 115 | 22 | 6.E-01 |  |
| C09 | BoSF0185  | 39.7 | 48 | 48 | 71 | 0   | 0   | 12 | 2.E-01 |  |
| C09 | BrSF0425b | 41.2 | 42 | 45 | 82 | 0   | 0   | 10 | 9.E-01 |  |
| C09 | BoSF0483  | 44.2 | 43 | 48 | 88 | 0   | 0   | 0  | 8.E-01 |  |
| C09 | BrSF0369  | 45.7 | 41 | 0  | 0  | 137 | 0   | 1  | 5.E-01 |  |
| C09 | BoGMS1473 | 49.7 | 47 | 0  | 0  | 119 | 0   | 13 | 3.E-01 |  |

**Table S4** Identification of genomic arrangements between the pseudochromosomes of *B. napus* and *B. rapa*/*B. oleracea* through comparative mapping.

| Linkage_group | Marker_name | Genetic position (cM) | Physical position <i>B.napus</i> (Mb) | Physical position <i>B.rapa</i> / <i>B.oleracea</i> (Mb) | Genomic rearrangement |
|---------------|-------------|-----------------------|---------------------------------------|----------------------------------------------------------|-----------------------|
| A01           | niab097a    | 6.137                 | 0.638                                 | 1.041                                                    |                       |
| A01           | BrGMS0081b  | 0.000                 | 0.798                                 | 1.201                                                    |                       |
| A01           | BoSF2770    | 8.826                 | 0.885                                 | 1.282                                                    |                       |
| A01           | BnEMS0886   | 13.258                | 1.026                                 | 1.428                                                    |                       |
| A01           | niab106     | 27.155                | 1.062                                 | 1.466                                                    |                       |
| A01           | niab071     | 37.502                | 1.324                                 | 1.787                                                    |                       |
| A01           | BrSF0019    | 43.442                | 1.360                                 | 1.824                                                    |                       |
| A01           | CNU142c     | 41.508                | 1.447                                 | 1.926                                                    |                       |
| A01           | BoSF0224b   | 44.260                | 1.537                                 | 2.037                                                    |                       |
| A01           | CNU139a     | 39.177                | 1.623                                 | 2.133                                                    |                       |
| A01           | BoSF1331a   | 46.816                | 2.452                                 | 0.083                                                    | Translocation         |
| A01           | BoSF0302    | 44.813                | 2.567                                 | 0.183                                                    | Translocation         |
| A01           | CB10081     | 50.398                | 2.700                                 | 0.324                                                    | Translocation         |
| A01           | BRMS037     | 50.398                | 2.700                                 | 0.324                                                    | Translocation         |
| A01           | niab113a    | 51.996                | 2.743                                 | 0.367                                                    | Translocation         |
| A01           | BrSF0403    | 56.532                |                                       | 2.952                                                    |                       |
| A01           | BoSF2131    | 59.369                | 2.828                                 | 3.125                                                    |                       |
| A01           | CB10099a    | 69.142                | 3.903                                 | 4.226                                                    |                       |
| A01           | BrSF0016    | 72.156                | 5.670                                 | 6.187                                                    |                       |
| A01           | BrSF0446    | 82.652                | 8.537                                 | 9.917                                                    |                       |
| A01           | CB10189     | 83.543                | 8.891                                 | 10.266                                                   |                       |
| A01           | BoSF1659    | 91.434                | 9.995                                 | 11.205                                                   |                       |
| A01           | BoSF0503    | 89.807                | 10.354                                | 11.639                                                   |                       |
| A01           | CNU132b     | 89.807                | 10.354                                | 11.639                                                   |                       |
| A01           | Ra2G05      | 90.667                | 10.428                                | 11.565                                                   |                       |
| A01           | BoSF0764    | 87.526                | 14.715                                | 16.385                                                   |                       |
| A01           | BrSF0702    | 93.336                | 14.863                                | 16.498                                                   |                       |

|     |           |         |        |        |
|-----|-----------|---------|--------|--------|
| A01 | BrSF0703  | 94.070  | 15.559 | 16.658 |
| A01 | SA63      | 93.813  | 15.648 | 16.747 |
| A01 | BrSF0706  | 94.994  |        | 17.373 |
| A01 | BrSF0010  | 98.066  | 15.713 | 17.715 |
| A01 | CNU068    | 98.066  | 15.713 | 17.715 |
| A01 | BrSF0009  | 98.469  | 15.761 | 17.748 |
| A01 | BoSF0050a | 99.589  | 16.498 | 19.182 |
| A01 | BrSF0006  | 102.109 | 17.654 | 20.337 |
| A01 | CNU397    | 103.201 | 17.654 | 20.338 |
| A01 | BrSF1002  | 104.651 | 16.378 | 21.166 |
| A01 | TFZIP23   | 105.810 | 18.273 | 22.862 |
| A01 | sN3523    | 106.942 | 18.773 | 21.647 |
| A01 | BrSF0982  | 113.857 |        | 22.574 |
| A01 | BoSF0911  | 119.126 | 21.557 | 26.906 |
| A01 | BoSF2123  | 124.408 |        |        |
| A01 | BrSF0973  | 125.451 |        |        |
| A01 | Na14F11b  | 126.504 |        | 27.720 |
| A01 | CNU388    | 123.510 | 22.720 | 27.924 |
| A01 | CNU474    | 122.062 | 22.733 | 27.937 |
| A01 | BrSF0949  | 128.788 | 22.744 | 27.946 |
| A01 | BoSF0197  | 124.959 | 23.248 | 25.047 |
| A01 | BoSF1939  | 124.130 | 23.811 | 25.609 |
| A02 | niab025   | 0.000   | 0.124  | 1.257  |
| A02 | sR94102   | 6.091   | 0.622  | 3.137  |
| A02 | BoSF0239  | 12.750  | 1.390  | 3.994  |
| A02 | BrGMS0511 | 11.109  | 1.567  | 4.171  |
| A02 | BrSF0065a | 11.495  | 1.564  | 4.188  |
| A02 | BoSF2549  | 5.653   | 1.661  | 4.285  |
| A02 | BrSF0051  | 9.366   | 1.687  | 4.311  |
| A02 | MR052     | 20.344  | 1.958  | 4.583  |

|     |           |        |        |        |
|-----|-----------|--------|--------|--------|
| A02 | BrSF0665  | 19.076 | 2.154  | 5.039  |
| A02 | BRAS083   | 18.449 | 3.140  | 5.945  |
| A02 | BrSF0062  | 23.627 | 3.258  | 6.062  |
| A02 | BRAS037   | 22.352 | 3.512  | 6.335  |
| A02 | BrSF0661  | 24.901 | 3.709  | 6.493  |
| A02 | BoSF2224  | 27.243 | 3.773  | 6.555  |
| A02 | sN3761    | 26.170 | 3.973  | 6.755  |
| A02 | BrSF0663  | 27.955 | 3.976  | 6.757  |
| A02 | sR6293    | 29.867 | 4.211  | 7.173  |
| A02 | BrSF0045  | 30.517 | 4.294  | 7.256  |
| A02 | BoSF0329  | 31.636 | 4.414  | 7.392  |
| A02 | BrSF0049  | 38.209 | 4.815  | 7.834  |
| A02 | BrSF0750  | 33.482 | 4.996  | 8.014  |
| A02 | BrSF0053  | 33.958 | 5.187  | 8.205  |
| A02 | BrSF0052  | 34.232 | 5.223  | 8.241  |
| A02 | BrSF0754  | 34.611 | 5.576  | 8.626  |
| A02 | BrSF0755  | 36.160 | 5.996  | 9.046  |
| A02 | BrSF0031  | 43.056 | 7.043  | 10.197 |
| A02 | BoSF1714  | 43.632 | 7.050  | 10.206 |
| A02 | CNU046    | 41.949 | 7.105  | 10.253 |
| A02 | BoSF2100  | 45.934 | 8.340  | 11.335 |
| A02 | BrSF0056  | 47.796 | 8.621  | 11.912 |
| A02 | BrSF0570  | 47.181 | 8.945  | 12.234 |
| A02 | IFLP018   | 51.207 | 9.507  |        |
| A02 | BoSF0216  | 53.595 | 10.518 | 12.319 |
| A02 | FITO255   | 55.186 | 10.709 | 12.511 |
| A02 | BoSF0926c | 56.204 | 11.268 | 14.490 |
| A02 | BrSF0680  | 58.123 | 11.097 | 14.653 |
| A02 | BrSF0679  | 48.538 | 11.058 | 14.693 |
| A02 | BrSF0682  | 52.142 | 12.574 | 16.347 |

|     |           |        |        |        |               |
|-----|-----------|--------|--------|--------|---------------|
| A02 | BoSF2657  | 60.739 | 14.049 | 16.838 |               |
| A02 | BrSF0032  | 61.277 | 14.270 | 17.090 |               |
| A02 | BrSF1044  | 60.560 | 14.523 | 17.142 |               |
| A02 | BrSF0695  | 61.096 | 14.661 | 17.233 |               |
| A02 | BrSF0696  | 60.908 | 14.799 | 17.372 |               |
| A02 | BrSF0836  | 61.383 | 16.482 |        |               |
| A02 | BrSF0472  | 61.298 | 17.422 | 18.321 |               |
| A02 | BoSF1924  | 58.519 | 17.659 | 18.558 |               |
| A02 | BnEMS0401 | 65.481 | 17.732 | 18.632 |               |
| A02 | CB10628   | 61.673 | 18.212 | 19.174 |               |
| A02 | BrSF0520  | 61.821 | 18.310 | 19.267 |               |
| A02 | BrSF0519  | 62.212 | 18.346 | 19.393 |               |
| A02 | BoSF2324  | 63.208 | 18.402 | 19.444 |               |
| A02 | BrSF0689  | 67.263 | 13.178 | 21.952 | Translocation |
| A02 | BoSF2214  | 79.579 | 22.380 | 24.248 |               |
| A02 | Na14B05   | 82.883 | 22.654 | 24.522 |               |
| A03 | niab115a  | 0.000  | 0.882  | 1.050  |               |
| A03 | BrSF0427  | 15.601 | 1.430  | 1.597  |               |
| A03 | BoSF1704  | 6.235  | 1.487  | 1.880  |               |
| A03 | BrSF0029  | 18.587 | 2.218  | 2.665  |               |
| A03 | BrSF0422  | 12.803 | 3.052  | 3.500  |               |
| A03 | CB10036   | 16.469 | 3.618  | 4.065  |               |
| A03 | BoSF2852  | 17.061 | 3.665  | 4.140  |               |
| A03 | BrSF0350  | 16.072 | 3.703  | 4.165  |               |
| A03 | BrGMS0642 | 12.057 | 3.824  | 4.295  |               |
| A03 | BoSF2392a | 20.613 | 4.090  | 4.569  |               |
| A03 | TFZIP19   | 21.126 | 4.132  | 4.630  |               |
| A03 | BrSF0090  | 21.803 | 4.458  | 5.026  |               |
| A03 | KS50980   | 21.803 | 4.458  | 5.026  |               |
| A03 | BrSF0091  | 25.358 | 4.529  | 5.095  |               |

|     |           |        |        |        |
|-----|-----------|--------|--------|--------|
| A03 | BrSF0089  | 24.215 | 4.550  | 5.119  |
| A03 | sR6688a   | 23.346 | 4.554  | 5.130  |
| A03 | BoSF2807  | 26.810 | 5.379  | 5.966  |
| A03 | BrSF0845a | 25.748 | 5.414  | 6.000  |
| A03 | BoSF0546  | 28.826 | 5.453  | 6.036  |
| A03 | BrSF0087a | 26.284 | 5.463  | 6.047  |
| A03 | BoSF0560  | 30.901 | 5.881  | 6.465  |
| A03 | IGF2134f2 | 33.461 | 6.342  | 7.056  |
| A03 | BnEMS0894 | 32.160 | 6.496  | 7.221  |
| A03 | BrSF0092  | 35.003 | 6.734  | 7.442  |
| A03 | BoSF2277  | 40.535 | 7.084  | 7.791  |
| A03 | BrSF0300  | 39.258 | 7.216  | 7.931  |
| A03 | Na12E02a  | 38.657 | 7.237  | 7.954  |
| A03 | O111B05   | 38.724 | 7.304  | 8.020  |
| A03 | BoSF0415b | 40.190 | 7.330  | 8.041  |
| A03 | CNU253    | 36.982 | 7.367  | 8.074  |
| A03 | CNU288    | 44.098 | 8.774  | 9.504  |
| A03 | BoSF0664  | 45.234 | 8.994  | 9.763  |
| A03 | BrSF0114  | 44.940 |        |        |
| A03 | BoSF2744  | 48.097 | 9.708  | 10.529 |
| A03 | BoSF2220  | 51.321 | 10.039 | 10.860 |
| A03 | BoSF1709  | 50.759 | 10.175 | 11.057 |
| A03 | BrSF0078  | 49.846 | 10.189 | 11.062 |
| A03 | CNU466    | 48.903 | 10.435 | 11.321 |
| A03 | BoSF2915  | 52.768 | 10.825 | 11.698 |
| A03 | BoSF1715  | 55.365 | 11.303 | 12.186 |
| A03 | CB10329   | 55.365 | 11.303 | 12.186 |
| A03 | BrSF0295  | 55.903 | 11.411 | 12.336 |
| A03 | BoSF1886  | 57.487 | 11.787 | 12.656 |
| A03 | CNU098    | 62.056 | 13.536 | 14.358 |

|     |           |         |        |        |
|-----|-----------|---------|--------|--------|
| A03 | BoSF1678  | 62.056  | 13.536 | 14.358 |
| A03 | CNU259    | 63.987  | 13.786 | 14.616 |
| A03 | FITO285   | 66.467  | 14.178 | 15.062 |
| A03 | BoSF1651  | 66.975  | 14.299 | 15.242 |
| A03 | BrSF0102  | 68.405  | 14.556 | 15.495 |
| A03 | Na14G10   | 70.646  | 14.776 | 15.716 |
| A03 | OI11G11   | 70.646  | 14.776 | 15.716 |
| A03 | CNU422    | 69.766  | 14.828 | 15.756 |
| A03 | sN11722   | 73.614  | 15.085 | 16.001 |
| A03 | CB10114   | 73.614  | 15.085 | 16.001 |
| A03 | BoSF0598  | 73.745  | 15.125 | 16.042 |
| A03 | BoSF2828  | 76.066  | 15.430 | 16.303 |
| A03 | BoSF1085  | 98.859  | 20.728 | 21.933 |
| A03 | CNU371    | 100.367 | 20.765 | 21.965 |
| A03 | CNU223    | 101.388 | 20.873 | 22.058 |
| A03 | sR11644   | 105.768 | 21.157 | 22.380 |
| A03 | BoSF2145  | 104.130 | 21.184 | 22.406 |
| A03 | BoSF0346  | 105.853 | 21.190 | 22.412 |
| A03 | BoSF0393  | 105.853 | 21.191 | 22.412 |
| A03 | MR181     | 109.775 |        |        |
| A03 | KS40432   | 111.819 | 22.713 | 24.118 |
| A03 | BoGMS1071 | 110.630 | 24.483 | 24.036 |
| A03 | BrSF0708  | 118.254 | 23.229 | 24.850 |
| A03 | BnGMS0616 | 114.400 | 23.462 | 25.083 |
| A03 | BoSF1919  | 115.995 | 23.622 | 25.243 |
| A03 | BoSF1779  | 121.972 | 23.997 | 25.618 |
| A03 | BrSF0918  | 129.106 | 24.797 | 26.405 |
| A03 | CB10425   | 126.413 | 25.015 | 26.638 |
| A04 | BrSF0564  | 0.000   | 0.895  | 1.152  |
| A04 | BrSF0560  | 5.422   | 1.585  | 1.857  |

|     |           |        |        |        |
|-----|-----------|--------|--------|--------|
| A04 | BrSF0112  | 6.644  | 2.321  | 2.616  |
| A04 | BoSF2609  | 1.806  | 2.855  | 3.150  |
| A04 | BoSF0336a | 11.158 | 7.258  | 5.472  |
| A04 | IPLP014   | 13.370 | 7.593  | 5.807  |
| A04 | BnGMS0115 | 14.865 | 8.598  | 6.724  |
| A04 | BrSF1049  | 17.256 | 9.183  | 7.055  |
| A04 | BrSF1032  | 18.017 | 9.530  | 7.403  |
| A04 | niab143   | 19.104 | 10.508 | 8.811  |
| A04 | BoSF1125  | 20.424 | 10.608 | 8.911  |
| A04 | sN2025    | 24.625 | 11.525 | 9.809  |
| A04 | CNU246    | 33.342 | 13.166 | 11.604 |
| A04 | BoSF1161  | 35.118 | 13.312 | 11.753 |
| A04 | CNU039    | 36.054 | 13.913 | 12.572 |
| A04 | BrSF0726  | 47.004 | 15.297 | 14.271 |
| A04 | BoSF0415a | 48.352 | 15.580 | 14.583 |
| A04 | BoSF0482  | 50.058 | 15.620 |        |
| A04 | BrSF0719  | 50.566 | 15.781 | 14.745 |
| A04 | BoSF1476  | 52.094 |        |        |
| A04 | BoSF1555  | 60.071 | 16.202 | 15.433 |
| A04 | BrSF0645  | 57.732 | 16.326 | 15.557 |
| A04 | BrSF0646  | 54.765 | 16.467 | 15.698 |
| A04 | BoSF0231  | 56.838 | 16.505 | 15.749 |
| A04 | BrSF0120  | 56.303 | 16.614 | 15.858 |
| A04 | IPLP036   | 59.688 | 17.067 | 16.311 |
| A04 | BrSF0642a | 64.418 | 17.721 | 17.036 |
| A04 | BrSF0643  | 63.206 | 17.895 | 17.216 |
| A04 | BoSF1642  | 62.457 | 18.015 | 17.341 |
| A04 | BoSF0841b | 68.278 | 18.259 | 17.601 |
| A04 | BoSF2769  | 70.580 | 18.524 | 17.862 |
| A04 | BrSF0969  | 79.398 | 19.073 |        |

|     |           |        |        |        |             |
|-----|-----------|--------|--------|--------|-------------|
| A04 | BrSF0972  | 87.075 | 18.963 | 18.342 |             |
| A05 | BoSF1666  | 0.000  | 1.932  | 1.810  |             |
| A05 | Na14G02   | 3.685  |        |        |             |
| A05 | BrSF0712  | 4.773  |        |        |             |
| A05 | BoSF2141  | 14.432 | 7.955  | 9.762  |             |
| A05 | BrSF0975a | 20.703 | 8.626  | 10.433 |             |
| A05 | ns231     | 12.303 | 9.363  | 10.623 |             |
| A05 | ns218     | 12.089 | 9.824  | 11.084 |             |
| A05 | ns213     | 11.287 | 10.128 | 11.595 |             |
| A05 | Na12E01a  | 22.757 |        |        |             |
| A05 | BrSF0952  | 24.498 | 10.921 | 14.302 | reshuffling |
| A05 | BoSF1098  | 21.205 | 11.957 | 11.998 | reshuffling |
| A05 | BrSF0942  | 20.763 | 11.962 | 15.492 | reshuffling |
| A05 | CNU398    | 20.763 | 11.962 | 15.492 | reshuffling |
| A05 | BrSF0550  | 25.121 | 12.489 | 12.492 | reshuffling |
| A05 | CNU029    | 24.725 | 12.504 | 12.508 | reshuffling |
| A05 | BnGMS0293 | 24.487 | 13.874 | 14.130 | reshuffling |
| A05 | BrSF1031b | 26.496 |        | 15.654 |             |
| A05 | BrSF0849  | 26.550 |        | 16.452 |             |
| A05 | BrSF0620  | 23.775 | 15.937 | 17.746 |             |
| A05 | BrSF0618  | 29.904 | 16.298 | 18.002 |             |
| A05 | BrGMS0293 | 34.224 | 17.371 | 19.141 |             |
| A05 | ns211     | 28.085 | 18.227 | 20.013 |             |
| A05 | BoSF1230  | 37.693 | 18.323 | 20.109 |             |
| A05 | IFLP039   | 42.296 | 18.623 | 20.410 |             |
| A05 | BoSF1749  | 46.577 | 18.743 | 20.543 |             |
| A05 | BoSF0582  | 45.996 | 18.827 | 20.620 |             |
| A05 | BrSF0497  | 45.653 | 18.872 | 20.664 |             |
| A05 | BoSF0259  | 46.101 | 18.996 | 20.788 |             |
| A05 | BrSF0491  | 52.510 | 19.946 | 21.770 |             |

|     |           |        |        |        |
|-----|-----------|--------|--------|--------|
| A05 | CNU268    | 49.231 | 20.118 | 21.979 |
| A05 | snap1047a | 55.602 | 20.194 | 22.070 |
| A05 | BoSF2746  | 50.565 | 20.219 | 22.101 |
| A05 | BoSF2030  | 51.322 | 20.281 | 22.163 |
| A06 | BoSF0784  | 0.000  | 0.936  | 0.896  |
| A06 | BrSF0149  | 1.122  | 1.109  | 1.069  |
| A06 | BoSF2253  | 2.036  |        |        |
| A06 | BoSF0869  | 4.756  | 1.839  | 1.873  |
| A06 | BoSF0455c | 5.725  | 1.849  | 1.895  |
| A06 | CB10143   | 9.301  | 2.251  | 2.242  |
| A06 | BrSF0860  | 7.427  | 2.259  | 2.255  |
| A06 | BoSF1212b | 13.533 | 2.549  | 2.588  |
| A06 | IFLP001   | 12.059 | 2.617  | 2.670  |
| A06 | BrSF0741  | 17.742 | 3.194  | 3.377  |
| A06 | BoSF1521  | 19.652 | 3.266  | 3.448  |
| A06 | BrSF0743  | 21.424 | 3.422  | 3.653  |
| A06 | BoSF2583  | 25.721 | 4.053  | 4.263  |
| A06 | BoSF0022a | 30.223 | 4.374  | 4.555  |
| A06 | BRAS052   | 34.204 | 4.394  | 4.583  |
| A06 | BoSF2360  | 29.500 | 4.432  | 4.621  |
| A06 | BrSF0171  | 39.307 | 5.818  | 6.379  |
| A06 | BoSF1990  | 41.412 | 5.916  | 6.477  |
| A06 | BoSF1752  | 42.769 | 6.138  | 6.751  |
| A06 | BnGMS0480 | 46.507 | 7.247  | 7.606  |
| A06 | IGF1653c  | 47.255 | 7.300  | 7.664  |
| A06 | CNU050    | 47.136 | 7.418  | 7.784  |
| A06 | CB10006   | 48.109 | 8.010  | 8.466  |
| A06 | CNU149    | 47.603 | 8.051  | 8.532  |
| A06 | BrSF0858b | 48.764 | 8.538  | 9.070  |
| A06 | BrSF0789  | 52.464 | 16.332 | 14.852 |

|     |             |        |        |        |
|-----|-------------|--------|--------|--------|
| A06 | BoSF1414    | 60.554 | 17.936 | 16.424 |
| A06 | BrSF0154    | 57.530 | 18.451 | 17.034 |
| A06 | BoSF2407    | 55.461 | 18.470 | 17.054 |
| A06 | BoSF1509    | 56.327 | 18.771 | 17.378 |
| A06 | ENA23       | 54.901 | 18.941 | 17.545 |
| A06 | BrSF0153    | 59.325 | 19.147 | 17.751 |
| A06 | sS1949      | 66.073 | 19.329 | 17.910 |
| A06 | BoSF1522    | 65.324 | 19.391 | 17.972 |
| A06 | BoGMS0314   | 63.709 | 19.447 | 18.069 |
| A06 | BoSF0213    | 66.688 | 19.838 | 18.443 |
| A06 | IGF5707b    | 65.937 | 19.880 | 18.506 |
| A06 | BrSF47-389  | 78.872 | 21.656 | 22.617 |
| A06 | BrSF47-382a | 76.704 | 21.664 | 22.625 |
| A06 | CNU400      | 80.039 | 21.700 | 22.668 |
| A06 | BrSF0162    | 79.727 | 21.700 | 22.669 |
| A06 | BrSF47-277  | 81.929 | 21.870 | 22.845 |
| A06 | BrSF47-234  | 82.832 | 21.965 | 22.915 |
| A06 | BoSF1088    | 83.466 | 21.977 | 22.927 |
| A06 | BrSF47-54   | 84.485 | 22.315 | 23.268 |
| A06 | BoSF0783a   | 84.726 | 22.402 | 23.355 |
| A06 | BrSF47-10   | 84.307 | 22.404 | 23.357 |
| A06 | BoSF2406    | 83.843 |        | 23.371 |
| A06 | BrSF0820    | 84.304 | 22.405 | 23.427 |
| A06 | BrSF46-22   | 84.304 | 22.405 | 23.427 |
| A06 | BrSF0821    | 84.681 | 22.424 | 23.448 |
| A06 | BrSF0819    | 84.961 | 22.590 | 23.614 |
| A06 | BrSF46-167  | 86.399 | 22.671 | 23.686 |
| A06 | BrSF46-176a | 85.709 | 22.683 | 23.699 |
| A06 | BrSF46-177  | 85.365 | 22.686 | 23.699 |
| A06 | BrSF46-186  | 85.269 | 22.695 | 23.707 |

|     |            |         |        |        |
|-----|------------|---------|--------|--------|
| A06 | BrSF46-238 | 88.186  | 22.787 | 23.806 |
| A06 | BrSF0822   | 88.918  | 22.837 | 23.850 |
| A06 | BrSF46-291 | 87.775  | 22.893 | 23.906 |
| A06 | BrSF46-306 | 87.383  | 22.927 | 23.940 |
| A06 | BrSF0166   | 93.842  | 23.131 | 24.232 |
| A06 | BnID107    | 99.121  | 23.515 | 24.615 |
| A06 | BnID108    | 96.956  | 23.566 | 24.667 |
| A06 | BoSF2788   | 99.684  | 23.603 | 24.704 |
| A06 | BoSF2702   | 98.257  | 23.628 | 24.725 |
| A06 | BrSF0144   | 97.692  | 23.736 | 24.829 |
| A06 | BoSF0215   | 113.265 | 25.150 | 26.244 |
| A07 | sR4047     | 0.000   | 0.756  | 0.829  |
| A07 | sR282      | 0.886   | 1.641  | 1.564  |
| A07 | BoSF2344   | 3.692   | 5.038  | 3.080  |
| A07 | BoSF0665   | 6.885   | 6.877  | 5.018  |
| A07 | AT1G27050  | 16.259  | 9.070  | 7.722  |
| A07 | BoSF2653   | 17.782  | 10.078 | 8.654  |
| A07 | BRAS023    | 13.176  | 10.114 | 8.683  |
| A07 | BrSF0331   | 20.103  | 10.195 | 8.750  |
| A07 | CNU273     | 35.174  | 14.472 | 12.545 |
| A07 | BrSF0185   | 35.174  | 14.472 | 12.545 |
| A07 | sR7223     | 37.794  | 14.441 | 12.315 |
| A07 | niab043    | 46.866  | 15.886 | 13.959 |
| A07 | BRMS036    | 53.675  | 18.575 | 16.648 |
| A07 | BoSF0898   | 60.479  | 20.077 | 18.185 |
| A07 | CNU037     | 62.737  | 20.117 | 18.224 |
| A07 | CNU339     | 61.221  | 20.118 | 18.226 |
| A07 | BoGMS2110  | 69.554  | 20.736 | 18.917 |
| A07 | CNU043     | 73.766  | 21.730 | 19.911 |
| A07 | CNU331b    | 71.117  | 21.929 | 20.167 |

|     |            |        |        |        |
|-----|------------|--------|--------|--------|
| A07 | BoSF2257   | 82.081 | 22.564 | 21.015 |
| A07 | CNU053     | 80.449 | 22.962 | 21.412 |
| A07 | CNU052     | 81.096 | 23.017 | 21.479 |
| A07 | BrSF0480   | 84.890 | 23.162 | 21.619 |
| A07 | BoSF2703   | 87.874 | 23.163 | 21.620 |
| A07 | BoSF0707   | 91.481 | 23.823 | 22.280 |
| A07 | BoSF1972   | 92.450 | 23.871 | 22.460 |
| A07 | CNU308     | 96.838 | 23.623 | 22.224 |
| A08 | BrGMS0339a | 4.326  | 13.905 | 16.432 |
| A08 | BrSF0210   | 6.837  | 14.092 | 16.637 |
| A08 | BnEMS1142  | 1.210  | 14.229 | 16.757 |
| A08 | BoSF0711a  | 0.000  | 14.574 | 17.100 |
| A08 | BoSF2672   | 14.103 | 14.848 | 17.391 |
| A08 | snap0675   | 13.367 | 15.365 | 17.926 |
| A08 | BnEMS0412  | 16.054 | 15.479 | 18.027 |
| A08 | BrSF0606   | 18.997 | 15.748 | 18.295 |
| A08 | BoSF1830   | 19.520 | 15.771 | 18.319 |
| A08 | BnEMS0236  | 23.297 | 16.105 | 18.653 |
| A08 | BoSF0693   | 23.297 | 16.105 | 18.653 |
| A08 | sN12352    | 25.407 | 16.241 | 18.889 |
| A08 | BrGMS0825  | 27.440 | 16.267 | 18.915 |
| A08 | BoSF2499   | 32.550 | 16.515 | 19.177 |
| A09 | KS51170    | 0.000  | 3.888  | 4.115  |
| A09 | BrSF0916a  | 1.585  | 4.806  | 4.899  |
| A09 | BnID040    | 13.982 | 4.863  | 5.191  |
| A09 | BoSF0270   | 15.427 | 4.933  | 5.258  |
| A09 | BnID041    | 14.524 | 5.029  | 5.354  |
| A09 | BnID042    | 12.161 | 5.072  | 5.523  |
| A09 | CNU157     | 11.414 | 5.221  | 5.671  |
| A09 | BnID043    | 8.277  | 5.257  | 5.698  |

|     |             |        |        |        |
|-----|-------------|--------|--------|--------|
| A09 | BnID044     | 3.719  | 5.362  | 5.803  |
| A09 | BnID045     | 9.123  | 5.369  | 5.810  |
| A09 | CNU004      | 12.892 | 5.397  | 5.852  |
| A09 | BnID046     | 10.253 | 5.454  | 5.905  |
| A09 | BrSF0255    | 6.978  | 5.729  | 7.240  |
| A09 | BnID047     | 9.543  | 5.739  | 7.250  |
| A09 | BoSF2624    | 34.291 | 17.581 | 20.650 |
| A09 | BnID052     | 36.781 | 19.764 | 22.347 |
| A09 | BnID053     | 37.051 | 19.792 | 22.381 |
| A09 | BrSF0998    | 45.764 | 22.810 | 24.788 |
| A09 | CNU402      | 47.167 | 23.197 | 25.175 |
| A09 | BnID056     | 48.993 | 23.268 | 25.245 |
| A09 | BoSF2489    | 43.963 | 23.604 | 25.458 |
| A09 | ns155       | 49.486 | 24.006 | 25.921 |
| A09 | ns156       | 40.901 | 24.018 | 25.934 |
| A09 | ns158       | 56.370 | 24.143 | 26.068 |
| A09 | BrSF6-104   | 50.096 | 24.217 | 26.148 |
| A09 | ns160       | 55.118 | 26.700 | 28.759 |
| A09 | ns161       | 56.753 | 26.700 | 28.759 |
| A09 | ns162       | 53.123 | 26.705 | 28.765 |
| A09 | BoSF0232    | 58.919 | 26.729 | 28.797 |
| A09 | ns163       | 60.472 | 26.748 | 28.817 |
| A09 | ns164       | 60.472 | 26.748 | 28.817 |
| A09 | BnSF2342-39 | 68.871 | 28.125 | 30.342 |
| A09 | ns165       | 70.699 | 28.129 | 30.346 |
| A09 | ns166       | 70.699 | 28.129 | 30.346 |
| A09 | ns167       | 70.699 | 28.129 | 30.346 |
| A09 | ns168       | 70.699 | 28.129 | 30.346 |
| A09 | BnID075     | 72.104 | 28.244 | 30.449 |
| A09 | BnID076     | 71.371 | 28.258 | 30.463 |

|     |             |         |        |        |
|-----|-------------|---------|--------|--------|
| A09 | BoSF1814    | 105.283 | 28.319 | 30.526 |
| A09 | BrSF6-2245  | 74.181  | 28.349 | 30.600 |
| A09 | BrSF0389a   | 103.808 | 28.427 | 30.678 |
| A09 | BrSF0353    | 103.205 | 28.431 | 30.682 |
| A09 | BnSF400-28  | 95.854  | 28.525 | 30.767 |
| A09 | BnSF400-29  | 102.491 | 28.526 | 30.768 |
| A09 | BnSF400-54  | 103.619 | 28.553 | 30.801 |
| A09 | BrSF6-2380  | 96.817  | 28.563 | 30.811 |
| A09 | BnID078     | 108.166 | 28.565 | 30.816 |
| A09 | BrSF6-2389  | 102.032 | 28.572 | 30.823 |
| A09 | BrSF0251    | 102.032 | 28.572 | 30.823 |
| A09 | CNU264      | 100.245 | 28.591 | 30.842 |
| A09 | BrSF0383    | 100.245 | 28.591 | 30.842 |
| A09 | BoSF0223    | 104.757 | 28.595 | 30.849 |
| A09 | BrSF0250    | 105.283 | 28.599 | 30.851 |
| A09 | BrSF6-2413  | 105.283 | 28.599 | 30.851 |
| A09 | BnID079     | 107.200 | 28.604 | 30.856 |
| A09 | BnID060     | 77.113  | 28.838 | 31.151 |
| A09 | BrSF6-2562  | 76.400  | 28.872 | 31.190 |
| A09 | BnSF400-253 | 76.762  | 28.889 | 31.207 |
| A09 | BrSF0385    | 77.975  | 28.955 | 31.280 |
| A09 | BnID081     | 79.084  | 29.012 | 31.319 |
| A09 | ENA27       | 81.982  | 29.072 | 31.376 |
| A09 | BnID082     | 82.907  | 29.117 | 31.416 |
| A09 | BoSF0333    | 79.578  | 29.240 | 31.546 |
| A09 | BoSF2709    | 81.756  | 29.270 | 31.580 |
| A09 | BoSF2710    | 81.489  | 29.272 | 31.581 |
| A09 | BrSF0229    | 117.952 | 29.898 | 32.003 |
| A09 | BnID085     | 116.408 | 30.019 | 32.156 |
| A09 | BnID061     | 112.358 | 30.171 | 32.308 |

|     |            |         |        |        |
|-----|------------|---------|--------|--------|
| A09 | BnID086    | 110.293 | 30.293 | 32.475 |
| A09 | BnID087    | 111.058 | 30.311 | 32.493 |
| A09 | BnID090    | 112.490 | 30.917 | 33.217 |
| A09 | BnID062    | 114.603 |        | 33.611 |
| A09 | BnID094    | 114.379 |        | 33.658 |
| A09 | BnID063    | 113.425 | 31.076 | 33.837 |
| A09 | BoSF1920a  | 112.630 | 31.209 | 33.970 |
| A09 | BrSF0615b  | 116.971 | 31.249 | 34.010 |
| A09 | BoSF0872b  | 116.971 | 31.249 | 34.010 |
| A09 | BnID095    | 116.956 | 31.255 | 34.018 |
| A09 | BnID097    | 124.713 | 31.582 | 34.337 |
| A09 | BoSF2791   | 122.361 | 31.697 | 34.464 |
| A09 | BoSF1885   | 120.657 | 31.931 | 34.645 |
| A09 | BoSF2104a  | 120.869 | 32.190 | 34.980 |
| A09 | BnEMS0337  | 121.670 | 32.700 | 35.490 |
| A09 | BrSF77-118 | 123.262 | 32.867 | 35.719 |
| A09 | BrSF0261   | 125.864 | 33.699 | 36.739 |
| A09 | BoSF1902   | 125.794 | 33.992 | 37.032 |
| A09 | BrSF82-562 | 125.127 | 34.017 | 37.058 |
| A10 | BrSF0898a  | 0.000   |        |        |
| A10 | BrSF0958   | 4.862   | 7.634  | 4.604  |
| A10 | Na10E08    | 10.623  | 8.511  | 5.482  |
| A10 | BrSF0436b  | 10.623  | 8.511  | 5.482  |
| A10 | BoSF0652   | 26.195  | 11.468 | 10.030 |
| A10 | sS2066     | 25.380  | 11.706 | 10.326 |
| A10 | BrSF0287   | 26.843  | 11.853 | 10.480 |
| A10 | niab140    | 26.843  | 11.853 | 10.480 |
| A10 | BrSF0425a  | 30.494  | 12.330 | 10.939 |
| A10 | sR12384    | 30.314  | 12.366 | 10.977 |
| A10 | BrSF0283   | 33.626  | 12.721 | 11.405 |

|     |            |        |        |        |               |
|-----|------------|--------|--------|--------|---------------|
| A10 | niab122    | 36.032 | 12.984 | 12.936 |               |
| A10 | BrSF0415   | 37.266 | 13.110 | 13.068 |               |
| A10 | BoSF0601   | 36.732 | 13.155 | 13.121 |               |
| A10 | niab103    | 44.075 | 13.713 | 13.673 |               |
| A10 | BrGMS0536  | 44.921 | 13.797 | 13.761 |               |
| A10 | BoSF1808   | 48.493 | 13.832 | 13.796 |               |
| A10 | sN8502     | 47.179 | 13.930 | 13.895 |               |
| C01 | BrSF0279   | 0.000  |        |        |               |
| C01 | BoSF2670   | 4.551  | 1.902  | 2.160  |               |
| C01 | CB10587    | 11.112 | 2.273  | 2.531  |               |
| C01 | BoSF0224a  | 7.295  | 2.337  | 2.595  |               |
| C01 | CNU139c    | 15.069 | 2.467  | 2.713  |               |
| C01 | BoSF1469   | 18.174 | 3.122  | 3.256  |               |
| C01 | BnEMS1012  | 25.893 | 5.805  | 5.715  |               |
| C01 | niab068    | 29.242 | 5.878  | 5.793  |               |
| C01 | IGF2026c   | 31.768 | 5.910  | 5.827  |               |
| C01 | BoSF0678a  | 32.028 | 5.955  | 5.882  |               |
| C01 | CB10369b   | 34.099 | 6.282  | 6.209  |               |
| C01 | BoSF0442   | 34.425 | 6.301  | 6.228  |               |
| C01 | BoSF1667   | 35.483 | 6.430  | 6.357  |               |
| C01 | BoSF1998   | 35.730 |        |        |               |
| C01 | BoGMS1565a | 41.390 | 8.212  | 7.994  |               |
| C01 | BoSF2182   | 41.390 | 8.212  | 7.994  |               |
| C01 | BoSF0130   | 48.079 | 11.032 | 10.809 |               |
| C01 | BoSF0133   | 50.843 | 11.296 | 11.072 |               |
| C01 | BoSF0114   | 59.748 | 14.780 | 14.556 |               |
| C01 | BrSF0811   | 65.108 | 34.475 | 17.941 | Translocation |
| C01 | BrSF0705   | 70.767 | 28.235 | 23.234 |               |
| C01 | BoSF2314   | 68.799 | 28.302 | 23.293 |               |
| C01 | BoSF2538   | 73.258 | 28.875 | 26.281 |               |

|     |           |         |        |        |           |
|-----|-----------|---------|--------|--------|-----------|
| C01 | BoSF2346  | 70.906  | 29.505 | 26.911 |           |
| C01 | BoSF0050b | 75.799  | 29.818 | 27.224 |           |
| C01 | BoSF1372  | 76.790  |        | 28.263 |           |
| C01 | BoSF2575  | 78.684  | 31.345 | 29.274 |           |
| C01 | ns258     | 91.292  |        | 31.652 |           |
| C01 | ns059     | 94.081  | 34.106 | 32.358 |           |
| C01 | ns262     | 94.526  | 34.744 | 32.996 |           |
| C01 | BoSF1270  | 84.975  | 35.169 | 33.230 |           |
| C01 | FITO283   | 99.531  | 38.103 | 37.881 |           |
| C01 | BoSF2820  | 102.385 | 38.358 | 37.626 |           |
| C01 | BoSF1597  | 99.082  | 38.740 | 38.517 |           |
| C02 | BoSF1425  | 2.383   | 0.672  | 2.217  | Inversion |
| C02 | BoSF1799  | 1.926   | 0.754  | 2.123  | Inversion |
| C02 | BoSF2071  | 0.000   | 0.823  | 2.061  | Inversion |
| C02 | BnGMS0081 | 2.848   | 1.135  | 1.496  | Inversion |
| C02 | BoSF1539  | 3.200   | 1.305  | 1.465  | Inversion |
| C02 | BoSF2604  | 5.461   | 1.547  | 0.438  | Inversion |
| C02 | BoSF1017  | 4.453   | 1.727  | 0.258  | Inversion |
| C02 | BoSF1825  | 5.750   | 1.864  | 0.120  | Inversion |
| C02 | BoSF1826  | 5.875   | 1.870  | 0.115  | Inversion |
| C02 | O111H09   | 5.875   | 1.870  | 0.115  | Inversion |
| C02 | BoSF0132  | 5.078   | 1.912  | 0.073  | Inversion |
| C02 | BoGMS0665 | 3.780   | 1.973  | 0.012  | Inversion |
| C02 | CNU461    | 19.422  | 2.235  | 2.573  |           |
| C02 | BoSF1264  | 28.264  | 3.755  | 4.093  |           |
| C02 | BrSF0065b | 30.135  | 3.822  | 4.160  |           |
| C02 | niab124   | 31.164  | 4.298  | 4.612  |           |
| C02 | BoSF2242  | 34.257  | 8.266  | 6.147  |           |
| C02 | snap0673  | 39.120  | 8.569  | 7.209  |           |
| C02 | snap0674  | 36.162  | 8.569  | 7.209  |           |

|     |           |         |        |        |
|-----|-----------|---------|--------|--------|
| C02 | BoSF0033a | 41.434  | 8.886  | 7.527  |
| C02 | BoSF2475  | 52.109  | 14.032 | 12.673 |
| C02 | BoSF0880  | 57.365  | 15.596 | 13.657 |
| C02 | BnEMS0959 | 57.945  | 15.469 | 13.535 |
| C02 | CB10026   | 61.496  | 16.325 | 14.391 |
| C02 | BoSF0096  | 64.580  | 20.317 | 18.623 |
| C02 | BoSF0757  | 66.240  |        | 19.800 |
| C02 | BoSF1743  | 67.005  |        | 19.983 |
| C02 | BoSF0525b | 66.560  |        | 20.025 |
| C02 | BoSF0284  | 74.930  | 36.101 | 34.048 |
| C02 | ns314     | 90.565  | 36.166 | 34.122 |
| C02 | ns085     | 96.901  | 38.749 | 37.524 |
| C02 | BoSF1995a | 84.397  | 39.286 | 37.965 |
| C02 | BrSF0503  | 107.579 | 45.882 | 41.790 |
| C02 | BoSF0310  | 110.008 | 46.086 | 41.995 |
| C02 | BoGMS2128 | 111.156 | 46.361 | 42.269 |
| C02 | BoSF1258  | 112.187 |        |        |
| C02 | MD038     | 100.832 |        |        |
| C02 | BoSF2269  | 113.694 |        |        |
| C03 | BRMS006   | 8.932   |        |        |
| C03 | BoSF0421  | 9.729   | 0.012  |        |
| C03 | BoSF1944  | 9.472   | 0.282  | 0.037  |
| C03 | BoSF2181  | 0.000   | 0.385  | 0.129  |
| C03 | BoSF1005  | 6.468   | 0.473  | 0.220  |
| C03 | BoSF1977  | 7.535   | 0.592  | 0.338  |
| C03 | niab077   | 9.853   | 0.658  | 0.419  |
| C03 | niab115b  | 10.755  | 1.174  | 1.025  |
| C03 | BoSF2263  | 10.442  | 1.450  | 1.320  |
| C03 | BoGMS0707 | 8.526   | 1.691  | 1.581  |
| C03 | sR12137   | 4.549   | 1.924  | 1.811  |

|     |           |        |        |        |
|-----|-----------|--------|--------|--------|
| C03 | BoSF2861  | 12.364 | 2.082  | 1.973  |
| C03 | BoSF1510  | 13.000 | 2.085  | 1.976  |
| C03 | BoGMS0407 | 17.301 | 2.840  | 2.210  |
| C03 | BoSF0371  | 18.824 | 3.723  | 3.170  |
| C03 | BoSF1970  | 25.467 | 4.128  | 3.589  |
| C03 | BoSF2006  | 32.044 | 5.465  | 4.995  |
| C03 | BoSF2005  | 32.172 | 5.475  | 5.000  |
| C03 | BoSF2392b | 30.528 | 5.525  | 5.059  |
| C03 | BnID035a  | 35.832 | 5.896  | 5.621  |
| C03 | BoGMS0678 | 34.789 | 5.923  | 5.647  |
| C03 | BoSF0466  | 39.293 | 6.290  | 5.961  |
| C03 | FITO218   | 38.778 | 6.650  | 6.321  |
| C03 | BrSF0845b | 43.310 | 7.126  | 6.798  |
| C03 | BrBAC087b | 42.175 | 7.152  | 6.877  |
| C03 | BoSF2132  | 42.802 | 7.194  | 6.919  |
| C03 | BN12A     | 43.312 | 7.481  | 7.162  |
| C03 | CB10569   | 43.688 | 7.509  | 7.190  |
| C03 | BoSF0805  | 44.656 | 7.603  | 7.335  |
| C03 | CB10235   | 48.435 | 8.160  | 7.978  |
| C03 | BoSF2258  | 49.504 | 8.909  | 8.422  |
| C03 | BoSF2284  | 51.154 | 9.141  | 8.653  |
| C03 | Na12E02b  | 56.596 | 9.667  | 9.180  |
| C03 | ns027b    | 56.117 | 10.222 | 9.734  |
| C03 | OI10E05   | 59.661 | 11.161 | 9.848  |
| C03 | BrSF0299  | 54.737 | 11.175 | 9.862  |
| C03 | BoSF0670  | 58.050 | 11.175 | 9.862  |
| C03 | BoSF1271b | 61.416 |        | 10.386 |
| C03 | snap0622  | 67.039 | 12.656 | 11.694 |
| C03 | BoSF1276  | 63.809 | 12.705 | 11.746 |
| C03 | BoSF0840  | 66.133 | 13.900 | 12.482 |

|     |           |         |        |        |
|-----|-----------|---------|--------|--------|
| C03 | CB10057   | 81.272  | 15.395 | 14.250 |
| C03 | BoGMS0369 | 82.632  | 15.561 | 14.407 |
| C03 | BoSF0402  | 74.117  | 15.561 | 14.407 |
| C03 | BoSF0160  | 73.187  | 16.193 | 15.076 |
| C03 | BoSF2669  | 75.601  | 17.551 | 16.540 |
| C03 | BoSF0883  | 76.845  | 17.836 | 17.209 |
| C03 | BrGMS2766 | 79.345  | 18.806 | 18.179 |
| C03 | BoSF1911  | 74.833  | 18.840 | 18.213 |
| C03 | Na10E02   | 93.369  | 28.723 | 21.435 |
| C03 | Na12G05   | 78.000  | 29.730 | 24.330 |
| C03 | BoSF2281  | 92.053  | 31.058 | 28.247 |
| C03 | snap0260  | 84.782  | 33.055 | 29.280 |
| C03 | BoSF2723a | 97.115  | 40.387 | 32.624 |
| C03 | BoSF0176  | 110.499 | 46.516 | 39.908 |
| C03 | BoSF2821  | 109.640 | 46.820 | 40.211 |
| C03 | BoSF2233  | 109.441 | 46.859 | 40.251 |
| C03 | BoSF2754  | 109.353 | 46.892 | 40.284 |
| C03 | CALSSR    | 109.433 | 45.929 | 40.355 |
| C03 | BoGMS0819 | 112.089 | 46.073 | 40.499 |
| C03 | BoSF2509  | 108.722 | 47.486 | 43.713 |
| C03 | BoSF2510  | 107.179 | 47.494 | 43.721 |
| C03 | BoSF0711b | 104.750 | 47.536 | 43.777 |
| C03 | BoSF0926a | 113.718 | 47.672 | 45.402 |
| C03 | BrSF0193  | 116.309 | 47.683 | 45.413 |
| C03 | BRAS068   | 120.910 | 50.536 | 47.708 |
| C03 | MR049     | 123.296 | 50.720 | 47.523 |
| C03 | O113C12   | 121.768 | 50.801 | 48.412 |
| C03 | BoSF0960  | 130.195 | 55.354 | 50.621 |
| C03 | snap0833  | 134.048 | 55.800 | 51.444 |
| C03 | BoSF2513  | 135.654 | 57.463 | 54.442 |

|     |           |         |        |        |
|-----|-----------|---------|--------|--------|
| C03 | BoSF1650  | 140.367 | 57.685 | 54.773 |
| C03 | BrSF0214  | 148.684 | 57.689 | 54.776 |
| C03 | BrSF0869  | 138.768 | 57.724 | 54.806 |
| C03 | BoSF1136  | 144.371 | 57.761 | 54.844 |
| C04 | BoSF1319  | 6.001   | 1.090  | 0.122  |
| C04 | snap1060  | 0.000   | 1.662  | 0.722  |
| C04 | BrSF0313  | 9.826   | 1.797  | 0.857  |
| C04 | BoSF0349  | 17.181  | 2.326  | 1.774  |
| C04 | BoSF1492  | 17.648  | 2.415  | 1.865  |
| C04 | BoSF2273  | 15.282  | 3.586  | 2.380  |
| C04 | CNU286    | 20.731  | 3.158  | 2.894  |
| C04 | BoSF0643  | 20.731  | 3.158  | 2.894  |
| C04 | FITO366   | 21.311  | 3.228  | 2.966  |
| C04 | BoSF0016  | 21.936  | 3.246  | 2.982  |
| C04 | BoGMS1219 | 23.443  | 3.324  | 3.040  |
| C04 | BoSF1271a | 24.631  | 3.750  | 3.465  |
| C04 | BoSF0318  | 25.599  | 3.863  | 3.579  |
| C04 | BnEMS0038 | 28.314  | 3.903  | 7.304  |
| C04 | snap0205  | 40.458  | 4.541  | 6.649  |
| C04 | BoSF1722  | 29.574  | 4.674  | 6.492  |
| C04 | niab002   | 30.278  | 4.687  | 6.478  |
| C04 | snap1299  | 42.534  |        | 7.959  |
| C04 | BoSF2018  | 45.771  | 8.912  | 19.592 |
| C04 | MR119     | 47.488  | 8.986  | 19.666 |
| C04 | BoSF2723b | 47.914  |        |        |
| C04 | BoSF2884  | 53.611  |        |        |
| C04 | BoSF0952a | 53.827  |        |        |
| C04 | BoSF1336  | 54.086  | 14.375 |        |
| C04 | BoSF0552  | 55.436  | 14.566 |        |
| C04 | CB10428   | 54.911  | 14.748 |        |

|     |           |        |        |        |             |
|-----|-----------|--------|--------|--------|-------------|
| C04 | BoSF2040  | 55.617 | 14.932 |        |             |
| C04 | BoSF0997  | 54.813 | 16.282 | 12.198 | reshuffling |
| C04 | BoSF0592  | 56.299 | 17.709 | 26.429 | reshuffling |
| C04 | BoSF2106  | 52.269 | 18.344 | 25.248 | reshuffling |
| C04 | IFLP013   | 56.108 | 18.541 | 25.052 | reshuffling |
| C04 | BoSF0718  | 56.168 | 18.942 | 24.651 | reshuffling |
| C04 | BoSF2062  | 56.037 |        |        | reshuffling |
| C04 | BoSF0600  | 56.175 | 18.884 |        | reshuffling |
| C04 | BoSF1121  | 56.937 | 18.941 |        | reshuffling |
| C04 | BoSF0949  | 56.707 | 19.490 | 24.163 | reshuffling |
| C04 | snap1891  | 45.005 | 19.967 |        | reshuffling |
| C04 | BoSF1852  | 55.809 | 19.980 |        | reshuffling |
| C04 | BoSF1843  | 56.177 | 20.324 |        | reshuffling |
| C04 | BoSF0943  | 57.346 |        | 11.694 | reshuffling |
| C04 | BrSF0552  | 56.694 | 21.693 | 15.257 | reshuffling |
| C04 | BoGMS2091 | 58.214 | 22.111 | 14.839 | reshuffling |
| C04 | BRAS061   | 58.960 | 22.255 | 14.611 | reshuffling |
| C04 | BoSF1692  | 62.175 | 23.382 |        | reshuffling |
| C04 | snap0299  | 80.189 | 30.412 | 28.276 | reshuffling |
| C04 | BoSF0935  | 70.221 | 30.447 | 27.785 | reshuffling |
| C04 | sN464     | 70.522 | 30.516 | 27.716 | reshuffling |
| C04 | ns104     | 73.778 | 30.956 | 27.276 | reshuffling |
| C04 | BoGMS1031 | 71.015 | 31.086 | 27.146 | reshuffling |
| C04 | BoSF2872  | 69.537 | 31.088 | 27.144 | reshuffling |
| C04 | BoSF0495  | 69.848 | 31.124 | 27.112 | reshuffling |
| C04 | BoGMS0282 | 76.843 | 34.290 | 28.536 |             |
| C04 | BoSF2508  | 81.875 | 35.151 | 29.397 |             |
| C04 | BoSF2294  | 84.360 | 36.174 | 30.420 |             |
| C04 | ns126     | 94.751 | 36.517 | 30.763 |             |
| C04 | ns123     | 89.755 | 36.591 | 30.837 |             |

|     |            |         |        |        |               |
|-----|------------|---------|--------|--------|---------------|
| C04 | BoSF2666   | 86.275  | 36.852 | 31.098 |               |
| C04 | ns120      | 91.878  | 36.898 | 31.143 |               |
| C04 | BoSF0613   | 71.737  | 40.860 | 31.744 |               |
| C04 | BoSF0955   | 84.665  | 42.817 | 33.661 |               |
| C04 | BnGMS0160b | 105.115 | 45.654 | 38.055 |               |
| C04 | BoSF2838   | 110.630 | 47.462 | 39.909 |               |
| C04 | BoSF1937   | 123.433 | 48.115 | 40.444 |               |
| C04 | MR155      | 116.650 | 48.403 | 40.511 |               |
| C04 | O111H02    | 113.012 | 48.327 | 40.657 |               |
| C04 | BoSF1009   | 118.907 | 48.636 | 40.966 |               |
| C04 | snap1360   | 110.352 | 48.735 | 41.065 |               |
| C05 | BnEMS1131  | 0.000   | 1.694  | 1.718  |               |
| C05 | sORH13     | 5.448   | 2.248  | 2.031  |               |
| C05 | BoSF2552   | 8.620   | 2.441  | 2.480  |               |
| C05 | BoSF0017   | 10.293  | 2.529  | 2.567  |               |
| C05 | BoSF2607   | 11.844  | 2.589  | 2.656  |               |
| C05 | BoSF1212a  | 13.112  | 2.676  | 2.696  |               |
| C05 | BoSF2676   | 24.230  | 4.226  | 25.541 | Translocation |
| C05 | BoGMS2688  | 26.693  | 4.328  | 25.457 | Translocation |
| C05 | BoSF1663   | 30.692  | 4.874  | 3.350  |               |
| C05 | BoSF0022b  | 31.957  | 5.088  | 3.564  |               |
| C05 | CB10374    | 39.347  | 6.949  | 6.064  |               |
| C05 | BoSF0230   | 43.716  | 7.443  | 6.663  |               |
| C05 | Na12C01    | 50.373  | 10.659 | 16.976 |               |
| C05 | BrSF0858a  | 50.763  | 10.780 | 17.096 |               |
| C05 | BoSF1969   | 52.018  | 12.576 | 17.714 |               |
| C05 | BoSF2019   | 52.523  | 12.673 | 17.811 |               |
| C05 | ns033      | 57.307  |        |        |               |
| C05 | BoSF1918   | 58.273  | 16.685 | 11.982 | Translocation |
| C05 | BoSF0222   | 58.530  |        |        |               |

|     |           |        |        |        |               |
|-----|-----------|--------|--------|--------|---------------|
| C05 | sS2129    | 59.222 | 24.453 | 7.208  | Translocation |
| C05 | Na10D11   | 59.685 | 24.453 | 7.208  |               |
| C05 | sS2131    | 60.020 | 25.701 | 8.855  |               |
| C05 | BrSF0040  | 65.605 |        |        |               |
| C05 | CB10170   | 60.990 | 30.174 | 20.318 |               |
| C05 | BRAS040   | 67.332 | 30.992 | 21.135 |               |
| C05 | BoSF0926b | 66.617 | 31.097 | 21.241 |               |
| C06 | BoSF1665  | 16.453 | 1.430  | 2.715  | Inversion     |
| C06 | BoSF0733  | 16.041 | 1.826  | 1.177  |               |
| C06 | BoSF2316  | 17.657 | 2.958  | 0.045  |               |
| C06 | ns337     | 0.000  | 3.219  | 14.644 | Translocation |
| C06 | ns326     | 6.954  | 3.220  | 14.644 |               |
| C06 | BoSF0455b | 16.005 | 3.439  | 15.253 |               |
| C06 | snap0695b | 30.252 | 12.456 | 30.949 |               |
| C06 | BoSF0513  | 35.133 | 12.521 | 22.354 |               |
| C06 | BoSF2395  | 35.624 | 12.714 | 22.161 |               |
| C06 | BoSF1365  | 38.134 | 14.166 |        |               |
| C06 | Na12E01b  | 42.790 |        |        |               |
| C06 | snap1392  | 45.562 | 17.705 |        |               |
| C06 | snap1395  | 41.822 | 17.754 |        |               |
| C06 | BoSF1254  | 53.196 | 17.762 |        |               |
| C06 | BoSF0952b | 48.734 | 17.951 | 12.635 |               |
| C06 | BrSF0784  | 51.508 | 17.991 | 12.676 |               |
| C06 | BoSF0760  | 55.751 | 17.893 | 10.807 |               |
| C06 | MR133.1   | 50.171 | 18.102 | 11.057 |               |
| C06 | BoSF2506  | 54.529 | 18.766 |        |               |
| C06 | BoSF2507  | 52.558 | 18.782 |        |               |
| C06 | BoSF1126  | 59.954 | 20.394 | 24.496 |               |
| C06 | BoSF2591  | 62.084 | 20.438 | 24.540 |               |
| C06 | BoSF1406  | 76.301 | 29.433 |        |               |

|     |             |         |        |        |
|-----|-------------|---------|--------|--------|
| C06 | sR12387     | 75.964  | 29.486 |        |
| C06 | BoSF1144    | 76.919  | 29.502 |        |
| C06 | BoSF1951    | 82.591  | 30.587 | 32.127 |
| C06 | BoSF1468    | 77.696  | 31.158 | 32.698 |
| C06 | BnEMS0350   | 85.058  | 31.726 | 33.266 |
| C06 | CNU331a     | 93.683  | 34.190 | 37.415 |
| C06 | Na10C06     | 99.642  | 34.268 | 37.425 |
| C06 | ns347       | 109.710 | 34.497 | 37.645 |
| C07 | CB10534     | 0.000   | 19.301 |        |
| C07 | BoSF0778    | 8.179   |        |        |
| C07 | BoSF2740    | 10.544  | 26.053 | 28.351 |
| C07 | BoSF2771    | 11.880  | 26.105 | 28.435 |
| C07 | BoSF1559    | 14.550  | 26.895 | 29.290 |
| C07 | BoSF1324    | 18.413  | 27.954 | 30.200 |
| C07 | BrSF46-176b | 32.105  | 28.130 | 30.261 |
| C07 | BoSF0783b   | 20.299  | 28.889 | 31.005 |
| C08 | ns067       | 0.000   | 4.950  | 7.683  |
| C08 | BoSF0521    | 13.627  | 5.460  | 8.193  |
| C08 | BoGMS1419   | 10.797  | 5.715  | 8.448  |
| C08 | BoGMS0456   | 17.543  | 14.103 | 11.950 |
| C08 | BoSF0586a   | 16.909  | 14.437 | 12.284 |
| C08 | BoSF2163    | 26.736  | 15.226 | 13.087 |
| C08 | BoSF2274    | 18.771  | 15.779 | 13.721 |
| C08 | BoSF2646    | 19.384  | 15.887 | 14.067 |
| C08 | CB10053     | 19.920  | 15.990 | 14.170 |
| C08 | BoSF1481    | 20.392  | 15.996 | 14.185 |
| C08 | BoSF0554    | 21.849  |        |        |
| C08 | BoSF2482    | 31.472  | 19.127 | 18.004 |
| C08 | BnGMS0509   | 32.841  | 19.214 | 18.092 |
| C08 | snap1382    | 36.239  | 19.654 | 18.249 |

|     |             |         |        |        |
|-----|-------------|---------|--------|--------|
| C08 | BoSF2378    | 37.229  | 19.844 | 18.439 |
| C08 | BoSF0023    | 38.467  | 19.959 | 18.543 |
| C08 | BoSF2290    | 43.519  | 20.577 | 19.598 |
| C08 | BoSF1926    | 56.797  | 25.513 | 27.397 |
| C08 | BnEMS0020   | 53.391  | 25.537 | 27.421 |
| C08 | BoSF2751    | 67.868  | 28.387 | 30.261 |
| C08 | BoSF2347    | 66.166  | 28.805 | 30.671 |
| C08 | BoSF2616    | 73.432  | 29.723 | 31.590 |
| C08 | BoSF1222    | 74.824  | 29.991 | 31.839 |
| C08 | BnSF287-186 | 80.555  | 31.123 | 33.033 |
| C08 | niab129     | 81.512  | 31.176 | 33.096 |
| C08 | BrSF0356    | 82.689  | 31.222 | 33.141 |
| C08 | BrGMS0447   | 82.689  | 31.222 | 33.141 |
| C08 | CB10179     | 85.290  | 31.401 | 33.365 |
| C08 | IFLP021     | 92.111  | 33.288 | 35.630 |
| C08 | BoSF0365    | 93.779  | 33.449 | 35.791 |
| C08 | BnEMS1070   | 95.337  | 33.673 | 36.056 |
| C08 | BoSF0448    | 98.532  | 33.921 | 36.345 |
| C08 | BoSF1064    | 98.195  | 34.053 | 36.477 |
| C08 | BoSF2073    | 100.968 | 34.348 | 36.862 |
| C08 | BnEMS0606   | 103.818 | 34.941 | 37.507 |
| C08 | sR5795      | 105.811 | 35.121 | 37.731 |
| C08 | BN26A       | 107.213 | 35.293 | 37.900 |
| C08 | BoSF1920b   | 107.181 | 35.299 | 37.907 |
| C08 | BrSF0549a   | 107.955 | 35.354 | 37.962 |
| C08 | CB10092     | 111.915 | 36.037 | 38.689 |
| C08 | BrSF53-712  | 115.583 | 36.106 | 38.751 |
| C08 | CB10028     | 112.222 | 36.352 | 39.012 |
| C09 | BoSF0980    | 0.000   | 7.970  |        |
| C09 | BoSF0336b   | 3.403   |        |        |

|     |            |        |        |        |
|-----|------------|--------|--------|--------|
| C09 | BrSF54-590 | 4.620  | 13.856 | 5.104  |
| C09 | BoSF2578   | 5.757  | 13.859 | 5.107  |
| C09 | BoSF0948   | 8.847  | 14.614 | 5.862  |
| C09 | BnGMS0213  | 9.795  | 14.254 | 6.222  |
| C09 | BoSF1228   | 12.542 | 14.788 | 6.756  |
| C09 | BoSF2748   | 13.646 | 15.359 | 7.435  |
| C09 | BoSF1976   | 12.860 | 15.415 | 7.490  |
| C09 | BoSF2398   | 11.199 | 15.549 | 7.624  |
| C09 | BoSF1872   | 14.037 | 16.505 | 8.400  |
| C09 | BoSF1810   | 15.929 | 17.958 | 9.738  |
| C09 | BoGMS1561  | 17.108 | 18.047 | 9.827  |
| C09 | BoSF1788   | 17.108 | 18.047 | 9.827  |
| C09 | BrSF1008   | 16.810 | 18.115 | 9.895  |
| C09 | BoSF1817   | 18.121 | 18.368 | 10.149 |
| C09 | BoGMS1453  | 20.538 | 18.868 | 11.104 |
| C09 | BoSF0040   | 20.538 | 18.868 | 11.104 |
| C09 | BoSF2393   | 22.837 | 32.027 | 19.941 |
| C09 | BoSF2774   | 23.578 | 32.123 | 20.037 |
| C09 | BrSF0436a  | 24.124 | 32.262 | 20.176 |
| C09 | BoSF1647   | 22.397 | 32.391 | 20.452 |
| C09 | BrSF0425b  | 41.175 | 41.614 | 31.085 |
| C09 | BoSF0185   | 39.731 | 41.667 | 31.156 |
| C09 | BrSF0369   | 45.689 | 41.868 | 31.405 |
| C09 | OI12A04    | 38.407 | 41.998 | 31.535 |
| C09 | BoGMS1473  | 49.680 | 42.762 | 31.542 |
| C09 | BoSF0483   | 44.177 | 43.110 | 32.435 |

**Table S5** ANOVA analysis of pod number and seed number per pod in five experiments.

| Trait | Source               | DF  | SS      | MS     | F value | P value  | $\sigma^2$ | $h^2$ |
|-------|----------------------|-----|---------|--------|---------|----------|------------|-------|
| PNb   | Genotype             | 183 | 1352503 | 7391   | 2.0     | 3.7E-11  | 277.9      | 0.45  |
|       | Environment          | 3   | 2257494 | 752498 | 269.1   | 1.9E-118 | 1355.9     |       |
|       | Genotype×Environment | 469 | 1902498 | 4056   | 1.5     | 3.0E-06  | 420.2      |       |
|       | Error                | 748 | 2091418 | 2796   |         |          | 2796.0     |       |
| PNm   | Genotype             | 183 | 88726   | 485    | 4.9     | 7.9E-55  | 20.9       | 0.65  |
|       | Environment          | 4   | 246328  | 61582  | 816.2   | 1.2E-271 | 111.3      |       |
|       | Genotype×Environment | 646 | 110737  | 171    | 2.3     | 2.3E-27  | 32.0       |       |
|       | Error                | 751 | 56666   | 75     |         |          | 75.5       |       |
| PNw   | Genotype             | 183 | 1788677 | 9774   | 2.0     | 9.1E-11  | 400.4      | 0.49  |
|       | Environment          | 3   | 1588670 | 529557 | 152.5   | 4.0E-77  | 950.3      |       |
|       | Genotype×Environment | 469 | 2330885 | 4970   | 1.4     | 6.5E-06  | 499.3      |       |
|       | Error                | 748 | 2597027 | 3472   |         |          | 3472.0     |       |
| SNPPb | Genotype             | 183 | 4388    | 24     | 9.6     | 6.4E-113 | 1.6        | 0.82  |
|       | Environment          | 3   | 1741    | 580    | 235.8   | 2.1E-107 | 1.0        |       |
|       | Genotype×Environment | 469 | 1978    | 4      | 1.7     | 2.7E-11  | 0.6        |       |
|       | Error                | 741 | 1823    | 2      |         |          | 2.5        |       |
| SNPPm | Genotype             | 183 | 6243    | 34     | 13.2    | 2.4E-148 | 1.9        | 0.83  |
|       | Environment          | 4   | 10539   | 2635   | 1038.2  | 4.3E-303 | 4.8        |       |
|       | Genotype×Environment | 652 | 3819    | 6      | 2.3     | 2.6E-28  | 1.1        |       |
|       | Error                | 746 | 1893    | 3      |         |          | 2.5        |       |
| SNPPw | Genotype             | 183 | 4522    | 25     | 11.7    | 6.4E-134 | 1.7        | 0.83  |
|       | Environment          | 3   | 2031    | 677    | 324.9   | 1.0E-134 | 1.2        |       |
|       | Genotype×Environment | 470 | 1940    | 4      | 2.0     | 3.7E-17  | 0.7        |       |
|       | Error                | 743 | 1548    | 2      |         |          | 2.1        |       |

Table S6A

**Table S6A** List of all detected QTLs at both significant and suggestive level for pod number and seed number per pod.

| Trait_name          | Experiments | Linkage_groups | Position | Interval    | Additive_effect | Dominant effect | LOD_value | R ^2  | Level       |
|---------------------|-------------|----------------|----------|-------------|-----------------|-----------------|-----------|-------|-------------|
| Pod number          | W10F2:3m    | A01            | 104.1    | 94.3-104.5  | -4.31           | 2.24            | 3.0       | 12.6% | Significant |
| Pod number          | X11F2:3m    | A01            | 104.7    | 104.2-105.8 | -5.48           | 2.79            | 3.0       | 12.5% | Significant |
| Pod number          | W11F2:3b    | A03            | 33.5     | 31.9-39.3   | -7.75           | 7.52            | 2.8       | 2.8%  | Suggestive  |
| Pod number          | W11F2:3w    | A03            | 61.5     | 57.5-61.9   | -9.65           | 7.90            | 3.6       | 3.0%  | Significant |
| Pod number          | W11F2:3m    | A03            | 81.6     | 64.6-98     | -1.73           | -6.23           | 3.8       | 3.4%  | Significant |
| Pod number          | W09F2m      | A05            | 10.8     | 4-13.8      | -4.67           | 9.17            | 3.4       | 12.6% | Significant |
| Pod number          | W10F2:3m    | A06            | 86.3     | 82.8-92.6   | -7.40           | -2.70           | 9.9       | 23.9% | Significant |
| Pod number          | W11F2:3m    | A06            | 86.3     | 82.8-92.4   | -6.70           | -2.50           | 6.9       | 20.5% | Significant |
| Pod number          | X11F2:3m    | A06            | 86.3     | 82.6-93.0   | -3.96           | -1.48           | 7.7       | 24.0% | Significant |
| Pod number          | X11F2:4m    | A06            | 86.3     | 82.6-92.5   | -6.09           | -3.28           | 8.0       | 22.6% | Significant |
| Pod number          | X11F2:3w    | A09            | 44       | 34.5-46.4   | 4.02            | -7.55           | 2.6       | 2.0%  | Suggestive  |
| Pod number          | X11F2:3b    | A09            | 44       | 37.8-46.1   | 4.09            | -6.84           | 2.7       | 2.6%  | Suggestive  |
| Pod number          | W11F2:3m    | C02            | 5.1      | 3.2-17.4    | -2.34           | 3.02            | 4.0       | 17.8% | Significant |
| Pod number          | X11F2:3m    | C02            | 9.8      | 5.5-21.5    | -6.25           | 3.19            | 4.6       | 19.0% | Significant |
| Pod number          | W10F2:3m    | C02            | 9.8      | 5.8-18.2    | -6.82           | 2.51            | 4.4       | 18.6% | Significant |
| Pod number          | W09F2m      | C02            | 107.6    | 100.4-113.6 | -0.83           | 7.51            | 2.9       | 2.0%  | Suggestive  |
| Pod number          | W11F2:3b    | C03            | 11.4     | 5.9-12.6    | -2.56           | -8.49           | 2.7       | 2.1%  | Suggestive  |
| Pod number          | X11F2:3w    | C03            | 128.4    | 112-132.2   | -6.34           | -8.78           | 2.6       | 2.0%  | Suggestive  |
| Pod number          | W10F2:3m    | C06            | 51.2     | 49.1-53     | 5.78            | -6.20           | 4.2       | 11.8% | Significant |
| Pod number          | W11F2:3m    | C06            | 51.2     | 49.4-53     | 8.80            | -8.75           | 4.6       | 18.2% | Significant |
| Seed number per pod | X11F2:3b    | A01            | 17.3     | 12.4-23.2   | -1.01           | -1.05           | 4.2       | 8.8%  | Significant |
| Seed number per pod | X11F2:4b    | A01            | 113.9    | 109.7-116.2 | -0.83           | 1.03            | 4.1       | 3.1%  | Significant |
| Seed number per pod | X11F2:4m    | A01            | 113.9    | 106.6-117.7 | -0.94           | 1.13            | 3.1       | 2.2%  | Suggestive  |
| Seed number per pod | X11F2:4w    | A01            | 113.9    | 108.1-116.6 | -0.89           | 1.09            | 4.0       | 2.9%  | Significant |

Table S6A

|                     |          |     |      |           |       |       |      |       |             |
|---------------------|----------|-----|------|-----------|-------|-------|------|-------|-------------|
| Seed number per pod | W10F2:3b | A02 | 6.1  | 0.4-12.8  | 0.28  | 0.77  | 4.2  | 3.7%  | Suggestive  |
| Seed number per pod | W10F2:3w | A02 | 6.1  | 0.7-17.6  | 0.44  | 0.75  | 5.2  | 6.9%  | Significant |
| Seed number per pod | X11F2:4m | A02 | 21.1 | 19.9-23.3 | -0.34 | 0.88  | 3.6  | 2.3%  | Suggestive  |
| Seed number per pod | X11F2:4b | A02 | 43.1 | 36.2-45.9 | 0.94  | -0.59 | 4.4  | 6.5%  | Significant |
| Seed number per pod | X11F2:4m | A02 | 43.1 | 37.8-45.2 | 1.27  | -0.64 | 7.2  | 6.9%  | Significant |
| Seed number per pod | X11F2:4w | A02 | 43.1 | 36.2-45.5 | 1.13  | -0.68 | 5.9  | 7.7%  | Significant |
| Seed number per pod | X11F2:4m | A02 | 81.6 | 79.7-82.9 | 0.24  | 0.08  | 3.9  | 3.9%  | Significant |
| Seed number per pod | X11F2:4w | A02 | 81.6 | 80.2-82.9 | 0.40  | 0.04  | 4.6  | 4.6%  | Significant |
| Seed number per pod | X11F2:3m | A03 | 14.1 | 12-20.1   | -1.73 | 1.33  | 4.3  | 6.3%  | Significant |
| Seed number per pod | X11F2:3b | A03 | 118  | 116-123.7 | -0.92 | 1.67  | 3.3  | 5.6%  | Suggestive  |
| Seed number per pod | X11F2:3w | A03 | 118  | 116-121.9 | -0.71 | 1.51  | 3.0  | 3.0%  | Suggestive  |
| Seed number per pod | X11F2:3m | A05 | 0    | 0-1.8     | 0.69  | -1.59 | 3.9  | 3.5%  | Suggestive  |
| Seed number per pod | X11F2:4b | A05 | 8.8  | 4.2-13.7  | -0.89 | 1.32  | 4.1  | 4.8%  | Significant |
| Seed number per pod | X11F2:4w | A05 | 8.8  | 4.1-13.5  | -1.04 | 1.48  | 4.4  | 5.3%  | Significant |
| Seed number per pod | X11F2:4m | A05 | 10.8 | 6.8-14    | -1.15 | 1.60  | 4.0  | 4.2%  | Significant |
| Seed number per pod | W10F2:3b | A06 | 89.9 | 85.3-97.5 | 1.56  | 0.40  | 8.0  | 28.1% | Significant |
| Seed number per pod | W11F2:3b | A06 | 89.9 | 85.4-97.6 | 1.36  | 0.69  | 7.7  | 22.4% | Significant |
| Seed number per pod | X11F2:3b | A06 | 89.9 | 85.0-96.9 | 1.88  | 0.55  | 4.7  | 31.5% | Significant |
| Seed number per pod | X11F2:4b | A06 | 89.9 | 85.3-96.3 | 2.29  | 0.53  | 16.4 | 39.4% | Significant |
| Seed number per pod | W09F2m   | A06 | 89.9 | 85.2-96.3 | 2.15  | 0.86  | 10.0 | 25.6% | Significant |
| Seed number per pod | W10F2:3m | A06 | 89.9 | 85.5-96.3 | 1.97  | 0.51  | 10.4 | 28.1% | Significant |
| Seed number per pod | W11F2:3m | A06 | 89.9 | 85.3-96.3 | 1.84  | 0.69  | 13.4 | 34.6% | Significant |
| Seed number per pod | X11F2:3m | A06 | 89.9 | 85.4-96.3 | 2.40  | 0.31  | 11.3 | 44.7% | Significant |
| Seed number per pod | X11F2:4m | A06 | 89.9 | 85.3-96.3 | 2.49  | 0.56  | 21.8 | 43.6% | Significant |
| Seed number per pod | W10F2:3w | A06 | 89.9 | 85.4-97.0 | 1.66  | 0.56  | 9.8  | 24.0% | Significant |
| Seed number per pod | W11F2:3w | A06 | 89.9 | 85.3-97.1 | 1.54  | 0.64  | 10.3 | 27.7% | Significant |
| Seed number per pod | X11F2:3w | A06 | 89.9 | 85.1-97.4 | 2.17  | 0.63  | 7.2  | 37.4% | Significant |

Table S6A

|                     |          |     |      |           |       |       |      |       |             |
|---------------------|----------|-----|------|-----------|-------|-------|------|-------|-------------|
| Seed number per pod | X11F2:4w | A06 | 89.9 | 85.3-96.8 | 2.24  | 0.73  | 11.9 | 29.6% | Significant |
| Seed number per pod | W11F2:3b | A07 | 5.7  | 3.7-15.9  | 0.76  | 0.48  | 5.4  | 6.8%  | Significant |
| Seed number per pod | W11F2:3w | A07 | 7.7  | 3.7-15.8  | 0.74  | 0.57  | 6.3  | 7.1%  | Significant |
| Seed number per pod | X11F2:4b | A07 | 50.9 | 35.8-53.7 | 0.72  | 0.23  | 6.3  | 15.0% | Suggestive  |
| Seed number per pod | W10F2:3b | A07 | 53.7 | 48.1-59.1 | 0.73  | 0.94  | 10.2 | 16.2% | Significant |
| Seed number per pod | W10F2:3w | A07 | 55.7 | 47.9-61.2 | 0.75  | 0.61  | 7.2  | 17.7% | Significant |
| Seed number per pod | W11F2:3b | A07 | 57.2 | 45.4-59.6 | 1.25  | 0.69  | 6.4  | 14.2% | Suggestive  |
| Seed number per pod | W11F2:3m | A07 | 73.6 | 69.6-77.8 | 0.27  | 0.75  | 4.2  | 3.9%  | Significant |
| Seed number per pod | W11F2:3w | A07 | 75.8 | 69.6-78.7 | 0.39  | 0.18  | 2.9  | 2.7%  | Suggestive  |
| Seed number per pod | W10F2:3m | A07 | 77.8 | 73.6-78.8 | 0.78  | 0.62  | 4.5  | 4.9%  | Significant |
| Seed number per pod | X11F2:3b | A09 | 52   | 42.3-54.1 | 1.09  | -0.50 | 3.6  | 3.4%  | Suggestive  |
| Seed number per pod | W11F2:3b | A09 | 68.5 | 62.5-74   | 0.66  | 0.17  | 3.9  | 5.8%  | Significant |
| Seed number per pod | W11F2:3w | A09 | 68.9 | 62.5-76.2 | 0.52  | 0.13  | 3.2  | 4.0%  | Suggestive  |
| Seed number per pod | W11F2:3w | C02 | 5.8  | 2-18.1    | -0.71 | -0.13 | 3.8  | 6.7%  | Significant |
| Seed number per pod | W11F2:3b | C06 | 49.6 | 47.8-58.2 | 0.75  | 0.73  | 3.6  | 3.9%  | Suggestive  |
| Seed number per pod | W11F2:3w | C06 | 57.2 | 48-58.2   | 0.68  | 0.04  | 3.8  | 5.5%  | Significant |
| Seed number per pod | W10F2:3w | C06 | 13.5 | 11.5-17.5 | 0.98  | -1.00 | 4.5  | 7.0%  | Significant |
| Seed number per pod | W10F2:3b | C06 | 19.7 | 16.9-21.7 | 1.09  | -1.04 | 4.7  | 10.2% | Significant |

**Table S6B** List of identified QTLs after deleting non-reproducible suggestive QTLs for pod number and seed number per pod.

| Identified_QTL | Trait_name          | Experiments | Linkage_group | Position | Interval    | Additive_effect | Dominant effect | LOD_value | R ^2  | Level       |
|----------------|---------------------|-------------|---------------|----------|-------------|-----------------|-----------------|-----------|-------|-------------|
| qPN01          | Pod number          | W10F2:3m    | A01           | 104.1    | 94.3-104.5  | -4.31           | 2.24            | 3.0       | 12.6% | Significant |
| qPN02          | Pod number          | X11F2:3m    | A01           | 104.7    | 104.2-105.8 | -5.48           | 2.79            | 3.0       | 12.5% | Significant |
| Delelte        | Pod number          | W11F2:3b    | A03           | 33.5     | 31.9-39.3   | -7.75           | 7.52            | 2.8       | 2.8%  | Suggestive  |
| qPN03          | Pod number          | W11F2:3w    | A03           | 61.5     | 57.5-61.9   | -9.65           | 7.90            | 3.6       | 3.0%  | Significant |
| qPN04          | Pod number          | W11F2:3m    | A03           | 81.6     | 64.6-98     | -1.73           | -6.23           | 3.8       | 3.4%  | Significant |
| qPN05          | Pod number          | W09F2m      | A05           | 10.8     | 4-13.8      | -4.67           | 9.17            | 3.4       | 12.6% | Significant |
| qPN06          | Pod number          | W10F2:3m    | A06           | 86.3     | 82.8-92.6   | -7.40           | -2.70           | 9.9       | 23.9% | Significant |
| qPN07          | Pod number          | W11F2:3m    | A06           | 86.3     | 82.8-92.4   | -6.70           | -2.50           | 6.9       | 20.5% | Significant |
| qPN08          | Pod number          | X11F2:3m    | A06           | 86.3     | 82.6-93.0   | -3.96           | -1.48           | 7.7       | 24.0% | Significant |
| qPN09          | Pod number          | X11F2:4m    | A06           | 86.3     | 82.6-92.5   | -6.09           | -3.28           | 8.0       | 22.6% | Significant |
| qPN10          | Pod number          | X11F2:3w    | A09           | 44       | 34.5-46.4   | 4.02            | -7.55           | 2.6       | 2.0%  | Suggestive  |
| qPN11          | Pod number          | X11F2:3b    | A09           | 44       | 37.8-46.1   | 4.09            | -6.84           | 2.7       | 2.6%  | Suggestive  |
| qPN12          | Pod number          | W11F2:3m    | C02           | 5.1      | 3.2-17.4    | -2.34           | 3.02            | 4.0       | 17.8% | Significant |
| qPN13          | Pod number          | X11F2:3m    | C02           | 9.8      | 5.5-21.5    | -6.25           | 3.19            | 4.6       | 19.0% | Significant |
| qPN14          | Pod number          | W10F2:3m    | C02           | 9.8      | 5.8-18.2    | -6.82           | 2.51            | 4.4       | 18.6% | Significant |
| Delelte        | Pod number          | W09F2m      | C02           | 107.6    | 100.4-113.6 | -0.83           | 7.51            | 2.9       | 2.0%  | Suggestive  |
| Delelte        | Pod number          | W11F2:3b    | C03           | 11.4     | 5.9-12.6    | -2.56           | -8.49           | 2.7       | 2.1%  | Suggestive  |
| Delelte        | Pod number          | X11F2:3w    | C03           | 128.4    | 112-132.2   | -6.34           | -8.78           | 2.6       | 2.0%  | Suggestive  |
| qPN15          | Pod number          | W10F2:3m    | C06           | 51.2     | 49.1-53     | 5.78            | -6.20           | 4.2       | 11.8% | Significant |
| qPN16          | Pod number          | W11F2:3m    | C06           | 51.2     | 49.4-53     | 8.80            | -8.75           | 4.6       | 18.2% | Significant |
| qSN01          | Seed number per pod | X11F2:3b    | A01           | 17.3     | 12.4-23.2   | -1.01           | -1.05           | 4.2       | 8.8%  | Significant |
| qSN02          | Seed number per pod | X11F2:4b    | A01           | 113.9    | 109.7-116.2 | -0.83           | 1.03            | 4.1       | 3.1%  | Significant |
| qSN03          | Seed number per pod | X11F2:4m    | A01           | 113.9    | 106.6-117.7 | -0.94           | 1.13            | 3.1       | 2.2%  | Suggestive  |
| qSN04          | Seed number per pod | X11F2:4w    | A01           | 113.9    | 108.1-116.6 | -0.89           | 1.09            | 4.0       | 2.9%  | Significant |
| qSN05          | Seed number per pod | W10F2:3b    | A02           | 6.1      | 0.4-12.8    | 0.28            | 0.77            | 4.2       | 3.7%  | Suggestive  |
| qSN06          | Seed number per pod | W10F2:3w    | A02           | 6.1      | 0.7-17.6    | 0.44            | 0.75            | 5.2       | 6.9%  | Significant |

|         |                     |          |     |      |           |       |       |      |       |             |
|---------|---------------------|----------|-----|------|-----------|-------|-------|------|-------|-------------|
| Delelte | Seed number per pod | X11F2:4m | A02 | 21.1 | 19.9-23.3 | -0.34 | 0.88  | 3.6  | 2.3%  | Suggestive  |
| qSN07   | Seed number per pod | X11F2:4b | A02 | 43.1 | 36.2-45.9 | 0.94  | -0.59 | 4.4  | 6.5%  | Significant |
| qSN08   | Seed number per pod | X11F2:4m | A02 | 43.1 | 37.8-45.2 | 1.27  | -0.64 | 7.2  | 6.9%  | Significant |
| qSN09   | Seed number per pod | X11F2:4w | A02 | 43.1 | 36.2-45.5 | 1.13  | -0.68 | 5.9  | 7.7%  | Significant |
| qSN10   | Seed number per pod | X11F2:4m | A02 | 81.6 | 79.7-82.9 | 0.24  | 0.08  | 3.9  | 3.9%  | Significant |
| qSN11   | Seed number per pod | X11F2:4w | A02 | 81.6 | 80.2-82.9 | 0.40  | 0.04  | 4.6  | 4.6%  | Significant |
| qSN12   | Seed number per pod | X11F2:3m | A03 | 14.1 | 12-20.1   | -1.73 | 1.33  | 4.3  | 6.3%  | Significant |
| qSN13   | Seed number per pod | X11F2:3b | A03 | 118  | 116-123.7 | -0.92 | 1.67  | 3.3  | 5.6%  | Suggestive  |
| qSN14   | Seed number per pod | X11F2:3w | A03 | 118  | 116-121.9 | -0.71 | 1.51  | 3.0  | 3.0%  | Suggestive  |
| Delelte | Seed number per pod | X11F2:3m | A05 | 0    | 0-1.8     | 0.69  | -1.59 | 3.9  | 3.5%  | Suggestive  |
| qSN15   | Seed number per pod | X11F2:4b | A05 | 8.8  | 4.2-13.7  | -0.89 | 1.32  | 4.1  | 4.8%  | Significant |
| qSN16   | Seed number per pod | X11F2:4w | A05 | 8.8  | 4.1-13.5  | -1.04 | 1.48  | 4.4  | 5.3%  | Significant |
| qSN17   | Seed number per pod | X11F2:4m | A05 | 10.8 | 6.8-14    | -1.15 | 1.60  | 4.0  | 4.2%  | Significant |
| qSN18   | Seed number per pod | W10F2:3b | A06 | 88.9 | 85.3-97.5 | 1.56  | 0.40  | 8.0  | 28.1% | Significant |
| qSN19   | Seed number per pod | W11F2:3b | A06 | 88.9 | 85.4-97.6 | 1.36  | 0.69  | 7.7  | 22.4% | Significant |
| qSN20   | Seed number per pod | X11F2:3b | A06 | 88.9 | 85.0-96.9 | 1.88  | 0.55  | 4.7  | 31.5% | Significant |
| qSN21   | Seed number per pod | X11F2:4b | A06 | 88.9 | 85.3-96.3 | 2.29  | 0.53  | 16.4 | 39.4% | Significant |
| qSN22   | Seed number per pod | W09F2m   | A06 | 88.9 | 85.2-96.3 | 2.15  | 0.86  | 10.0 | 25.6% | Significant |
| qSN23   | Seed number per pod | W10F2:3m | A06 | 88.9 | 85.5-96.3 | 1.97  | 0.51  | 10.4 | 28.1% | Significant |
| qSN24   | Seed number per pod | W11F2:3m | A06 | 88.9 | 85.3-96.3 | 1.84  | 0.69  | 13.4 | 34.6% | Significant |
| qSN25   | Seed number per pod | X11F2:3m | A06 | 88.9 | 85.4-96.3 | 2.40  | 0.31  | 11.3 | 44.7% | Significant |
| qSN26   | Seed number per pod | X11F2:4m | A06 | 88.9 | 85.3-96.3 | 2.49  | 0.56  | 21.8 | 43.6% | Significant |
| qSN27   | Seed number per pod | W10F2:3w | A06 | 88.9 | 85.4-97   | 1.66  | 0.56  | 9.8  | 24.0% | Significant |
| qSN28   | Seed number per pod | W11F2:3w | A06 | 88.9 | 85.3-97.1 | 1.54  | 0.64  | 10.3 | 27.7% | Significant |
| qSN29   | Seed number per pod | X11F2:3w | A06 | 88.9 | 85.1-97.4 | 2.17  | 0.63  | 7.2  | 37.4% | Significant |
| qSN30   | Seed number per pod | X11F2:4w | A06 | 88.9 | 85.3-96.8 | 2.24  | 0.73  | 11.9 | 29.6% | Significant |
| qSN31   | Seed number per pod | W11F2:3b | A07 | 5.7  | 3.7-15.9  | 0.76  | 0.48  | 5.4  | 6.8%  | Significant |
| qSN32   | Seed number per pod | W11F2:3w | A07 | 7.7  | 3.7-15.8  | 0.74  | 0.57  | 6.3  | 7.1%  | Significant |
| qSN33   | Seed number per pod | X11F2:4b | A07 | 50.9 | 35.8-53.7 | 0.72  | 0.23  | 6.3  | 15.0% | Suggestive  |
| qSN34   | Seed number per pod | W10F2:3b | A07 | 53.7 | 48.1-59.1 | 0.73  | 0.94  | 10.2 | 16.2% | Significant |

|         |                     |          |     |      |           |       |       |     |       |             |
|---------|---------------------|----------|-----|------|-----------|-------|-------|-----|-------|-------------|
| qSN35   | Seed number per pod | W10F2:3w | A07 | 55.7 | 47.9-61.2 | 0.75  | 0.61  | 7.2 | 17.7% | Significant |
| qSN36   | Seed number per pod | W11F2:3b | A07 | 57.2 | 45.4-59.6 | 1.25  | 0.69  | 6.4 | 14.2% | Suggestive  |
| qSN37   | Seed number per pod | W11F2:3m | A07 | 73.6 | 69.6-77.8 | 0.27  | 0.75  | 4.2 | 3.9%  | Significant |
| qSN38   | Seed number per pod | W11F2:3w | A07 | 75.8 | 69.6-78.7 | 0.39  | 0.18  | 2.9 | 2.7%  | Suggestive  |
| qSN39   | Seed number per pod | W10F2:3m | A07 | 77.8 | 73.6-78.8 | 0.78  | 0.62  | 4.5 | 4.9%  | Significant |
| Delelte | Seed number per pod | X11F2:3b | A09 | 52   | 42.3-54.1 | 1.09  | -0.50 | 3.6 | 3.4%  | Suggestive  |
| qSN40   | Seed number per pod | W11F2:3b | A09 | 68.5 | 62.5-74   | 0.66  | 0.17  | 3.9 | 5.8%  | Significant |
| qSN41   | Seed number per pod | W11F2:3w | A09 | 68.9 | 62.5-76.2 | 0.52  | 0.13  | 3.2 | 4.0%  | Suggestive  |
| qSN42   | Seed number per pod | W11F2:3w | C02 | 5.8  | 2-18.1    | -0.71 | -0.13 | 3.8 | 6.7%  | Significant |
| qSN43   | Seed number per pod | W11F2:3b | C06 | 49.6 | 47.8-58.2 | 0.75  | 0.73  | 3.6 | 3.9%  | Suggestive  |
| qSN44   | Seed number per pod | W11F2:3w | C06 | 57.2 | 48-58.2   | 0.68  | 0.04  | 3.8 | 5.5%  | Significant |
| qSN45   | Seed number per pod | W10F2:3w | C06 | 13.5 | 11.5-17.5 | 0.98  | -1.00 | 4.5 | 7.0%  | Significant |
| qSN46   | Seed number per pod | W10F2:3b | C06 | 19.7 | 16.9-21.7 | 1.09  | -1.04 | 4.7 | 10.2% | Significant |

**Table S6C** List of consensus-QTL after the integration of reproducible identified-QTLs for pod number and seed number per pod, respectively.

| Consensus QTL    | Identified QTL | Experiment code                            | Linkage group | Peak Position | Confidence Interval | Additive effect | Dominant effect | LOD value  | R ^2         |
|------------------|----------------|--------------------------------------------|---------------|---------------|---------------------|-----------------|-----------------|------------|--------------|
| <i>qPN.A01-1</i> | qPN01          | W10F2:3m                                   | A01           | 104.1         | 94.3-104.5          | -4.31           | 2.24            | 3.0        | 12.6%        |
|                  | qPN02          | X11F2:3m                                   | A01           | 104.7         | 104.2-105.8         | -5.48           | 2.79            | 3.0        | 12.5%        |
|                  |                | <b>W10F2:3m/X11F2:3m</b>                   | <b>A01</b>    | <b>104.4</b>  | <b>94.3-105.8</b>   | <b>-4.90</b>    | <b>2.52</b>     | <b>3.0</b> | <b>12.5%</b> |
| <i>qPN.A03-1</i> | qPN03          | W11F2:3w                                   | A03           | 61.5          | 57.5-61.9           | -9.65           | 7.90            | 3.6        | 3.0%         |
| <i>qPN.A03-2</i> | qPN04          | W11F2:3m                                   | A03           | 81.6          | 64.6-98             | -1.73           | -6.23           | 3.8        | 3.4%         |
| <i>qPN.A05-1</i> | qPN05          | W09F2m                                     | A05           | 10.8          | 4-13.8              | -4.67           | 9.17            | 3.4        | 12.6%        |
| <i>qPN.A06-1</i> | qPN06          | W10F2:3m                                   | A06           | 86.3          | 82.8-92.6           | -7.40           | -2.70           | 9.9        | 23.9%        |
|                  | qPN07          | W11F2:3m                                   | A06           | 86.3          | 82.8-92.4           | -6.70           | -2.50           | 6.9        | 20.5%        |
|                  | qPN08          | X11F2:3m                                   | A06           | 86.3          | 82.6-93.0           | -3.96           | -1.48           | 7.7        | 24.0%        |
|                  | qPN09          | X11F2:4m                                   | A07           | 86.3          | 82.6-92.5           | -6.09           | -3.28           | 8.0        | 22.6%        |
|                  |                | <b>W10F2:3m/W11F2:3m/X11F2:3m/X11F2:4m</b> | <b>A06</b>    | <b>86.3</b>   | <b>82.6-93.0</b>    | <b>-6.04</b>    | <b>-2.49</b>    | <b>8.1</b> | <b>22.8%</b> |
| <i>qPN.A09-1</i> | qPN10          | X11F2:3w                                   | A09           | 44.0          | 34.5-46.4           | 4.02            | -7.55           | 2.6        | 2.0%         |
|                  | qPN11          | X11F2:3b                                   | A09           | 44.0          | 37.8-46.1           | 4.09            | -6.84           | 2.7        | 2.6%         |
|                  |                | <b>X11F2:3bw</b>                           | <b>A09</b>    | <b>44.0</b>   | <b>42.5-54.4</b>    | <b>4.05</b>     | <b>-7.20</b>    | <b>2.7</b> | <b>2.3%</b>  |
| <i>qPN.C02-1</i> | qPN12          | W11F2:3m                                   | C02           | 5.1           | 3.2-17.4            | -2.34           | 3.02            | 4.0        | 17.8%        |
|                  | qPN13          | X11F2:3m                                   | C02           | 9.8           | 5.5-21.5            | -6.25           | 3.19            | 4.6        | 19.0%        |
|                  | qPN14          | W10F2:3m                                   | C02           | 9.8           | 5.8-18.2            | -6.82           | 2.51            | 4.4        | 18.6%        |
|                  |                | <b>W10F2:3m/W11F2:3m/X11F2:3m</b>          | <b>C02</b>    | <b>8.2</b>    | <b>3.2-21.5</b>     | <b>-5.14</b>    | <b>2.91</b>     | <b>4.3</b> | <b>18.5%</b> |
| <i>qPN.C06-1</i> | qPN15          | W10F2:3m                                   | C06           | 51.2          | 49.1-53             | 5.78            | -6.20           | 4.2        | 11.8%        |
|                  | qPN16          | W11F2:3m                                   | C06           | 51.2          | 49.4-53             | 8.80            | -8.75           | 4.6        | 18.2%        |
|                  |                | <b>W10F2:3m/W11F2:3m</b>                   | <b>C06</b>    | <b>51.2</b>   | <b>49.1-53.0</b>    | <b>7.29</b>     | <b>-7.48</b>    | <b>4.4</b> | <b>15.0%</b> |
| <i>qSN.A01-1</i> | qSN01          | X11F2:3b                                   | A01           | 17.3          | 12.4-23.2           | -1.01           | -1.05           | 4.2        | 8.8%         |
|                  | qSN02          | X11F2:4b                                   | A01           | 113.9         | 109.7-116.2         | -0.83           | 1.03            | 4.1        | 3.1%         |
|                  | qSN03          | X11F2:4m                                   | A01           | 113.9         | 106.6-117.7         | -0.94           | 1.13            | 3.1        | 2.2%         |
|                  | qSN04          | X11F2:4w                                   | A01           | 113.9         | 108.1-116.6         | -0.89           | 1.09            | 4.0        | 2.9%         |

|                  |              |                   |            |              |                    |              |              |            |             |
|------------------|--------------|-------------------|------------|--------------|--------------------|--------------|--------------|------------|-------------|
| <i>qSN.A01-2</i> |              | <b>X11F2:4bmw</b> | <b>A01</b> | <b>113.9</b> | <b>106.6-117.7</b> | <b>-0.89</b> | <b>1.09</b>  | <b>3.7</b> | <b>2.7%</b> |
|                  | qSN05        | W10F2:3b          | A02        | 6.1          | 0.4-12.8           | 0.28         | 0.77         | 4.2        | 3.7%        |
|                  | qSN06        | W10F2:3w          | A02        | 6.1          | 0.7-17.6           | 0.44         | 0.75         | 5.2        | 6.9%        |
| <i>qSN.A02-1</i> |              | <b>W10F2:3bw</b>  | <b>A02</b> | <b>6.1</b>   | <b>0.4-17.6</b>    | <b>0.36</b>  | <b>0.76</b>  | <b>4.7</b> | <b>5.3%</b> |
|                  | qSN07        | X11F2:4b          | A02        | 43.1         | 36.2-45.9          | 0.94         | -0.59        | 4.4        | 6.5%        |
|                  | qSN08        | X11F2:4m          | A02        | 43.1         | 37.8-45.2          | 1.27         | -0.64        | 7.2        | 6.9%        |
|                  | qSN09        | X11F2:4w          | A02        | 43.1         | 36.2-45.5          | 1.13         | -0.68        | 5.9        | 7.7%        |
| <i>qSN.A02-2</i> |              | <b>X11F2:4bmw</b> | <b>A02</b> | <b>43.1</b>  | <b>36.2-45.9</b>   | <b>1.11</b>  | <b>-0.64</b> | <b>5.8</b> | <b>7.0%</b> |
|                  | qSN10        | X11F2:4m          | A02        | 81.6         | 79.7-82.9          | 0.24         | 0.08         | 3.9        | 3.9%        |
|                  | qSN11        | X11F2:4w          | A02        | 81.6         | 80.2-82.9          | 0.40         | 0.04         | 4.6        | 4.6%        |
| <i>qSN.A02-3</i> |              | <b>X11F2:4mw</b>  | <b>A02</b> | <b>81.6</b>  | <b>79.7-82.9</b>   | <b>0.32</b>  | <b>0.06</b>  | <b>4.2</b> | <b>4.3%</b> |
| <i>qSN.A03-1</i> | <b>qSN12</b> | <b>X11F2:3m</b>   | <b>A03</b> | <b>14.1</b>  | <b>12-20.1</b>     | <b>-1.73</b> | <b>1.33</b>  | <b>4.3</b> | <b>6.3%</b> |
|                  | qSN13        | X11F2:3b          | A03        | 118.0        | 116.0-123.7        | -0.92        | 1.67         | 3.3        | 5.6%        |
|                  | qSN14        | X11F2:3w          | A03        | 118.0        | 116.0-121.9        | -0.71        | 1.51         | 3.0        | 3.0%        |
| <i>qSN.A03-2</i> |              | <b>X11F2:3bw</b>  | <b>A03</b> | <b>118.0</b> | <b>116.0-123.7</b> | <b>-0.82</b> | <b>1.59</b>  | <b>3.1</b> | <b>4.3%</b> |
|                  | qSN15        | X11F2:4b          | A05        | 8.8          | 4.2-13.7           | -0.89        | 1.32         | 4.1        | 4.8%        |
|                  | qSN16        | X11F2:4w          | A05        | 8.8          | 4.1-13.5           | -1.04        | 1.48         | 4.4        | 5.3%        |
|                  | qSN17        | X11F2:4m          | A05        | 10.8         | 6.8-14             | -1.15        | 1.60         | 4.0        | 4.2%        |
| <i>qSN.A05-1</i> |              | <b>X11F2:4bmw</b> | <b>A05</b> | <b>9.5</b>   | <b>4.1-13.7</b>    | <b>-1.03</b> | <b>1.47</b>  | <b>4.1</b> | <b>4.7%</b> |
|                  | qSN18        | W10F2:3b          | A06        | 88.9         | 85.3-97.5          | 1.56         | 0.40         | 8.0        | 28.1%       |
|                  | qSN19        | W11F2:3b          | A06        | 88.9         | 85.4-97.6          | 1.36         | 0.69         | 7.7        | 22.4%       |
|                  | qSN20        | X11F2:3b          | A06        | 88.9         | 85.0-96.9          | 1.88         | 0.55         | 4.7        | 31.5%       |
|                  | qSN21        | X11F2:4b          | A06        | 88.9         | 85.3-96.3          | 2.29         | 0.53         | 16.4       | 39.4%       |
|                  | qSN22        | W09F2m            | A06        | 88.9         | 85.2-96.3          | 2.15         | 0.86         | 10.0       | 25.6%       |
|                  | qSN23        | W10F2:3m          | A06        | 88.9         | 85.5-96.3          | 1.97         | 0.51         | 10.4       | 28.1%       |
|                  | qSN24        | W11F2:3m          | A06        | 88.9         | 85.3-96.3          | 1.84         | 0.69         | 13.4       | 34.6%       |
|                  | qSN25        | X11F2:3m          | A06        | 88.9         | 85.4-96.3          | 2.40         | 0.31         | 11.3       | 44.7%       |
|                  | qSN26        | X11F2:4m          | A06        | 88.9         | 85.3-96.3          | 2.49         | 0.56         | 21.8       | 43.6%       |
|                  | qSN27        | W10F2:3w          | A06        | 88.9         | 85.4-97            | 1.66         | 0.56         | 9.8        | 24.0%       |
|                  | qSN28        | W11F2:3w          | A06        | 88.9         | 85.3-97.1          | 1.54         | 0.64         | 10.3       | 27.7%       |

|                  |                                                          |                 |            |             |                  |              |              |             |              |
|------------------|----------------------------------------------------------|-----------------|------------|-------------|------------------|--------------|--------------|-------------|--------------|
| <i>qSN.A06-1</i> | qSN29                                                    | X11F2:3w        | A06        | 88.9        | 85.1-97.4        | 2.17         | 0.63         | 7.2         | 37.4%        |
|                  | qSN30                                                    | X11F2:4w        | A06        | 88.9        | 85.3-96.8        | 2.24         | 0.73         | 11.9        | 29.6%        |
|                  | <b>W09F2m/W10F2:3bmw/W11F2:3bmw/X11F2:3bmw/X11F2:4bn</b> |                 | <b>A06</b> | <b>88.9</b> | <b>85.0-97.6</b> | <b>2.00</b>  | <b>0.60</b>  | <b>11.2</b> | <b>32.4%</b> |
| <i>qSN.A07-1</i> | qSN31                                                    | W11F2:3b        | A07        | 5.7         | 3.7-15.9         | 0.76         | 0.48         | 5.4         | 6.8%         |
|                  | qSN32                                                    | W11F2:3w        | A07        | 7.7         | 3.7-15.8         | 0.74         | 0.57         | 6.3         | 7.1%         |
|                  | <b>W11F2:3bw</b>                                         |                 | <b>A07</b> | <b>6.7</b>  | <b>3.7-15.9</b>  | <b>0.75</b>  | <b>0.53</b>  | <b>5.9</b>  | <b>6.9%</b>  |
| <i>qSN.A07-2</i> | qSN33                                                    | X11F2:4b        | A07        | 50.9        | 35.8-53.7        | 0.72         | 0.23         | 6.3         | 15.0%        |
|                  | qSN34                                                    | W10F2:3b        | A07        | 53.7        | 48.1-59.1        | 0.73         | 0.94         | 10.2        | 16.2%        |
|                  | qSN35                                                    | W10F2:3w        | A07        | 55.7        | 47.9-61.2        | 0.75         | 0.61         | 7.2         | 17.7%        |
|                  | qSN36                                                    | W11F2:3b        | A07        | 57.2        | 45.4-59.6        | 1.25         | 0.69         | 6.4         | 14.2%        |
|                  | <b>W10F2:3bw/W11F2:3b/X11F2:4b</b>                       |                 | <b>A07</b> | <b>54.4</b> | <b>35.8-61.1</b> | <b>0.86</b>  | <b>0.62</b>  | <b>7.5</b>  | <b>15.8%</b> |
| <i>qSN.A07-3</i> | qSN37                                                    | W11F2:3m        | A07        | 73.6        | 69.6-77.8        | 0.27         | 0.75         | 4.2         | 3.9%         |
|                  | qSN38                                                    | W11F2:3w        | A07        | 75.8        | 69.6-78.7        | 0.39         | 0.18         | 2.9         | 2.7%         |
|                  | qSN39                                                    | W10F2:3m        | A07        | 77.8        | 73.6-78.8        | 0.78         | 0.62         | 4.5         | 4.9%         |
|                  | <b>W10F2:3m/W11F2:3mw</b>                                |                 | <b>A07</b> | <b>75.7</b> | <b>69.6-78.8</b> | <b>0.48</b>  | <b>0.52</b>  | <b>3.9</b>  | <b>3.8%</b>  |
| <i>qSN.A09-1</i> | qSN40                                                    | W11F2:3b        | A09        | 68.5        | 62.5-74          | 0.66         | 0.17         | 3.9         | 5.8%         |
|                  | qSN41                                                    | W11F2:3w        | A09        | 68.9        | 62.5-76.2        | 0.52         | 0.13         | 3.2         | 4.0%         |
|                  | <b>W11F2:3bw</b>                                         |                 | <b>A09</b> | <b>68.7</b> | <b>68.5-82.2</b> | <b>0.59</b>  | <b>0.15</b>  | <b>3.6</b>  | <b>4.9%</b>  |
| <i>qSN.C02-1</i> | <b>qSN42</b>                                             | <b>W11F2:3w</b> | <b>C02</b> | <b>5.8</b>  | <b>2-18.1</b>    | <b>-0.71</b> | <b>-0.13</b> | <b>3.8</b>  | <b>6.7%</b>  |
| <i>qSN.C06-1</i> | qSN43                                                    | W11F2:3b        | C06        | 49.6        | 47.8-58.2        | 0.75         | 0.73         | 3.6         | 3.9%         |
|                  | qSN44                                                    | W11F2:3w        | C06        | 57.2        | 48-58.2          | 0.68         | 0.04         | 3.8         | 5.5%         |
|                  | <b>W11F2:3bw</b>                                         |                 | <b>C06</b> | <b>53.4</b> | <b>47.8-58.2</b> | <b>0.72</b>  | <b>0.39</b>  | <b>3.7</b>  | <b>4.7%</b>  |
| <i>qSN.C06-2</i> | qSN45                                                    | W10F2:3w        | C06        | 13.5        | 11.5-17.5        | 0.98         | -1.00        | 4.5         | 7.0%         |
|                  | qSN46                                                    | W10F2:3b        | C06        | 19.7        | 16.9-21.7        | 1.09         | -1.04        | 4.7         | 10.2%        |
|                  | <b>W10F2:3bw</b>                                         |                 | <b>C06</b> | <b>16.6</b> | <b>82.9-97.7</b> | <b>1.03</b>  | <b>-1.02</b> | <b>4.6</b>  | <b>8.6%</b>  |

**Table S7** List of QTLs identified in the current and previous studies for pod number and seed number per pod in rapeseed.

| Referecne          | Trait name | QTL name                                  | Linkage group | Marker interval      | Genomic region (Mb) | LOD value | $R^2$    | Additive effect | Repeat number |
|--------------------|------------|-------------------------------------------|---------------|----------------------|---------------------|-----------|----------|-----------------|---------------|
| Shi et al. 2009    | PNw        | <i>qPN.A1-1</i>                           | A01           | CB10097 / niab096    | 1.6-2.0             | 5.0       | 7.7      | -23.60          | 1             |
| Shi et al. 2009    | PNw        | <i>qPN.A1-2</i>                           | A01           | pW145 / S15M04-2-330 | 2.2-2.9             | 5.5       | 8.6      | -24.8           | 1             |
| Shi et al. 2009    | PNw        | <i>qPN.A1-3</i>                           | A01           | sR11990a / RA2G09    | 3.0-5.5             | 4.4       | 7        | -22.3           | 1             |
| Shi et al. 2009    | PNw        | <i>qPN.A1-4</i>                           | A01           | CB10095 / CNU235     | 5.9-6.8             | 2.7-7.9   | 4.7-12.2 | -               | 2             |
| Current study      | PN         | <i>qPN.A01-1</i>                          | A01           | BrSF0706 / TFZIP23   | 15.3-18.3           | 3.0       | 12.5     | -4.90           | 2             |
| Ding et al. 2012   | PNw        | <i>PNLP-A1</i>                            | A01           | MR38 / niab056       | 22.2-24.5           | /         | 13.7     | +               | 2             |
| Shi et al. 2009    | PNw        | <i>qPN.A2-1</i>                           | A02           | HUA133 / P10M8-130   | 0.1-/-              | 2.9-3.8   | 4.6-6    | -               | 2             |
| Ding et al. 2012   | PNw        | <i>PNLP-A2</i>                            | A02           | B070J05 / Na14H11    | 2.4-4.5             | /         | 10.4     | -               | 1             |
| Wang et al. 2010   | PNw        | <i>qSNP2</i>                              | A02           | ME6EM4b / ME14EM5b   | /-/-                | 2.5       | 35.64    | 171.89          | 1             |
| Shi et al. 2009    | PNw        | <i>qPN.A3-1</i>                           | A03           | FLC3 / pw189         | 1.3-2.7             | 2.4-3.8   | 3.4-6.2  | ±               | 2             |
| Ding et al. 2012   | PNw        | <i>PNLP-A3</i>                            | A03           | BoGMS0230 / BnGMS257 | 5.1-6.1             | /         | 9.2      | -               | 1             |
| Shi et al. 2013    | PNw        | <i>qPN-LP2-A3b</i>                        | A03           | MR123 / BRMS043      | 5.1-7.4             | 4.5       | 8.6      | +               | 1             |
| Radoev et al. 2008 | PNw        | <i>Sil/dm<sup>2</sup>_N3</i>              | A03           | E32M51_283E / MR12   | 10.8-13.2           | 10.7      | 12       | 2.88            | 1             |
| Current study      | PN         | <i>qPN.A03-1</i>                          | A03           | BrSF0295 / CNU098    | 11.4-13.5           | 3.6       | 3.0      | -9.65           | 1             |
| Current study      | PN         | <i>qPN.A03-2</i>                          | A03           | FITO285 / BoSF2828   | 14.2-15.4           | 3.8       | 3.4      | -1.73           | 1             |
| Shi et al. 2009    | PNw        | <i>qPN.A3-2</i>                           | A03           | SA29 / CNU276        | 14.0-15.2           | 3.4       | 6.4      | 25.10           | 1             |
| Shi et al. 2013    | PNw        | <i>qPN-LP1-A3/qPN-LP2-A3c/qPN-OP1-A3a</i> | A03           | CNU002 / CNU370      | 16.1-20.4           | 3.6       | 7.3      | +               | 3             |
| Shi et al. 2013    | PNw        | <i>qPN-OP1-A3b</i>                        | A03           | B072K21-4 / CNU371   | 18.7-20.8           | 3.8       | 8.0      | +               | 1             |
| Shi et al. 2013    | PNw        | <i>qPN-OP2-A3</i>                         | A03           | HBr033 / BnSQD1-A3   | 23.7-27.3           | 3.7       | 7.8      | +               | 1             |
| Shi et al. 2013    | PNw        | <i>qPN-LP2-A3a</i>                        | A03           | pw189 / HBr061       | 43.5-45.0           | 3.4       | 6.6      | +               | 1             |
| Shi et al. 2009    | PNw        | <i>qPN.A5-1</i>                           | A05           | sNRD03 / P01M22-200  | 0.0-0.8             | 4.1       | 4.4      | 12.90           | 1             |
| Ding et al. 2012   | PNw        | <i>PNNP-A5</i>                            | A05           | BnPHT1 / BoGMS1565c  | 3.3-4.0             | /         | 8.9      | -               | 1             |
| Shi et al. 2009    | PNw        | <i>qPN.A5-2</i>                           | A05           | E1HM31-130 / CNU344  | 3.6-4.6             | 4.5       | 8        | 38.30           | 1             |
| Current study      | PN         | <i>qPN.A05-1</i>                          | A05           | BrSF0712 / BoSF2141  | 6.0-8.0             | 3.4       | 12.6     | -4.67           | 1             |
| Shi et al. 2009    | PNw        | <i>qPN.A5-3</i>                           | A05           | sR9222 / Na10B08     | 10.4-11.2           | 4.6       | 6.7      | 35.30           | 1             |

|                    |     |                                |     |                           |           |         |          |        |   |
|--------------------|-----|--------------------------------|-----|---------------------------|-----------|---------|----------|--------|---|
| Shi et al. 2009    | PNw | <i>qPN.A5-4</i>                | A05 | CNU206 / pW161-2b         | 12.5-13.2 | 3.7     | 6.2      | 33.00  | 1 |
| Shi et al. 2009    | PNw | <i>qPN.A5-5</i>                | A05 | Na10E02 / CNU268          | 19.1-20.1 | 3.3     | 4.9      | 18.30  | 1 |
| Shi et al. 2009    | PNw | <i>qPN.A6-1</i>                | A06 | IGF1075d / niab37         | 7.3-11.1  | 3.2-3.4 | 3.5-5    | ±      | 2 |
| Ding et al. 2012   | PNw | <i>PNLP-A6</i>                 | A06 | H001J23 / BnGMS531        | 8.5-12.5  | /       | 13.3     | -      | 1 |
| Current study      | PN  | <i>qPN.A06-1</i>               | A06 | BrSF47-234 / BrSF0166     | 22.0-23.1 | 5.1     | 22.8     | -6.02  | 4 |
| Radoev et al. 2008 | PNw | <i>Sil/dm<sup>2</sup>_N7</i>   | A07 | CB10439 / MR153b          | 10.5-13.5 | 7.3     | 8.8      | 2.64   | 1 |
| Shi et al. 2009    | PNw | <i>qPN.A7-1</i>                | A07 | E1HM34-220 / 35RXTRAP10-4 | 11.0-12.9 | 2.6-3.3 | 4.6-6.2  | ±      | 2 |
| Yi et al. 2006     | PNw | <i>NPP1-LG4</i>                | A07 | M9E12750 / Ra2A01         | /-14.5    | 4.3     | 17.42    | 19.95  | 1 |
| Shi et al. 2009    | PNw | <i>qPN.A7-2</i>                | A07 | niab063 / sR7223          | 14.1-14.4 | 2.5-2.7 | 4.9-5.4  | ±      | 2 |
| Shi et al. 2009    | PNw | <i>qPN.A7-3</i>                | A07 | IGF3309b / P2M8-110       | 20.1-21.3 | 2.9     | 5.6      | -17.70 | 1 |
| Shi et al. 2009    | PNw | <i>qPN.A7-4</i>                | A07 | WRI1-2 / CNU168           | 21.1-22.0 | 3.5-6.9 | 6.5-13.7 | -      | 2 |
| Shi et al. 2009    | PNw | <i>qPN.A7-5</i>                | A07 | FTin1-a / IGF1226a        | 23.3-23.8 | 2.8-3.8 | 5.2-8    | -      | 2 |
| Wang et al. 2010   | PNw | <i>qSNP8</i>                   | A08 | ME17EM8c / Na12B05a       | /-15.4    | 2.7     | 12.96    | -8.18  | 1 |
| Ding et al. 2012   | PNw | <i>PNLP-A8</i>                 | A08 | em15me1b / em8me2         | /-/       | /       | 11.5     | -      | 1 |
| Radoev et al. 2008 | PNw | <i>Sil/dm<sup>2</sup>_LG10</i> | A08 | E34M47_185R / E45M60_234E | /-/       | 7.7     | 4.4      | 1.75   | 1 |
| Ding et al. 2012   | PNw | <i>PNNP-A9b</i>                | A09 | HBr304 / MR13             | 3.0-4.2   | /       | 10.7     | +      | 1 |
| Ding et al. 2012   | PNw | <i>PNNP-A9a</i>                | A09 | HBr303 / BnPAP11          | 3.3-4.8   | /       | 18.4     | +      | 1 |
| Shi et al. 2009    | PNw | <i>qPN.A9-1</i>                | A09 | FTin1-b / E8HM40-510      | 20.9-21.8 | 4.2     | 5.8      | -24.80 | 1 |
| Current study      | PN  | <i>qPN.A09-1</i>               | A09 | BrSF0998 / BrSF6-104      | 22.8-24.2 | 2.7     | 2.3      | 4.05   | 2 |
| Shi et al. 2009    | PNw | <i>qPN.A9-2</i>                | A09 | niab131 / CNU008          | 29.8-30   | 3.1     | 4.7      | 17.90  | 1 |
| Shi et al. 2013    | PNw | <i>qPN-LP2-A9</i>              | A09 | H091P21-4 / pW123aH       | 31.2-32.5 | 4.9     | 9.5      | +      | 1 |
| Shi et al. 2013    | PNw | <i>qPN-LP1-A9</i>              | A09 | HBr075 / H091P21-4        | 32.5-32.8 | 4.2     | 9.1      | +      | 1 |
| Radoev et al. 2008 | PNw | <i>Sil/dm<sup>2</sup>_N9</i>   | A09 | CB10533a / MR230          | 32.7-33.0 | 6.4     | 1.9      | -1.15  | 1 |
| Shi et al. 2009    | PNw | <i>qPN.A10-2</i>               | A10 | E5HM31-490 / IGF5108e     | 16.2-17.7 | 2.6-7.7 | 5.9-12.2 | ±      | 3 |
| Ding et al. 2012   | PNw | <i>PNNP-C1</i>                 | C01 | CB10369 / BoGMS0806       | 6.3-8.3   | /       | 9.2      | -      | 1 |
| Wang et al. 2010   | PNw | <i>qSNP11a</i>                 | C01 | Me9EM10c / O112F11a       | /-11.1    | 2.8     | 28.71    | 159.25 | 1 |
| Wang et al. 2010   | PNw | <i>qSNP11b</i>                 | C01 | Na12C08 / ME16EM2a        | 21.9-/    | 2.6     | 34.02    | 141.05 | 1 |
| Radoev et al. 2008 | PNw | <i>Sil/dm<sup>2</sup>_N11</i>  | C01 | MD60a / O110E12           | 25.0-18.5 | 4.7     | 2.9      | 1.40   | 1 |
| Shi et al. 2009    | PNw | <i>qPN.C1-1</i>                | C01 | E1HM34-150 / P13M6-90     | /-/       | 4.3     | 8.1      | 33.50  | 1 |

|                    |       |                                |     |                        |           |         |          |        |   |
|--------------------|-------|--------------------------------|-----|------------------------|-----------|---------|----------|--------|---|
| Current study      | PN    | <i>qPN.C02-1</i>               | C02 | BoSF1539 / CNU461      | 1.3-2.5   | 4.3     | 13.5     | -5.14  | 3 |
| Radoev et al. 2008 | PNw   | <i>Sil/dm<sup>2</sup>_N12b</i> | C02 | E35M62_117E / Na12E04b | /-4.5     | 14.3    | 15       | 3.22   | 1 |
| Shi et al. 2009    | PNw   | <i>qPN.C2-2</i>                | C02 | sR6293b / CB10530b     | 9.2-11.2  | 3.4-4.7 | 6.4-8.5  | +      | 2 |
| Radoev et al. 2008 | PNw   | <i>Sil/dm<sup>2</sup>_N12a</i> | C02 | CB10022a / MR104       | 41.8-45.4 | 7.7     | 6.1      | -1.79  | 1 |
| Shi et al. 2009    | PNw   | <i>qPN.C2-1</i>                | C02 | S13-50 / P04M21-490    | /-/       | 4.9     | 10.3     | 15.80  | 1 |
| Shi et al. 2009    | PNw   | <i>qPN.C2-3</i>                | C02 | Na12C12 / 21FXTRAP10-1 | /-/       | 4.0     | 9.3      | -22.40 | 1 |
| Ding et al. 2012   | PNw   | <i>PNNP-C3</i>                 | C03 | niab115 / BoGMS1288    | 2.2-3.3   | /       | 9.5      | -      | 1 |
| Shi et al. 2013    | PNw   | <i>qPN-LP3-C3a</i>             | C03 | BRMS106 / pX141aE      | 3.9-6.7   | 3.4     | 7.4      | -      | 1 |
| Shi et al. 2009    | PNw   | <i>qPN.C3-1</i>                | C03 | STS01 / pX141bE        | /-6.0     | 3.7     | 4.3      | -19.20 | 1 |
| Shi et al. 2013    | PNw   | <i>qPN-LP3-C3b</i>             | C03 | HG-FLC-C3b / HBr056    | 14.1-20.0 | 5.5     | 12.3     | +      | 1 |
| Shi et al. 2009    | PNw   | <i>qPN.C3-2</i>                | C03 | O11G11b / pW143        | 21.4-23.7 | 2.4-3.3 | 4.9-6.1  | +      | 2 |
| Shi et al. 2009    | PNw   | <i>qPN.C3-3</i>                | C03 | IGF3165b / CNU099      | 24.1-28.8 | 7.0     | 12       | 28.30  | 1 |
| Shi et al. 2009    | PNw   | <i>qPN.C3-4</i>                | C03 | IGF1141f / E7HM31-450  | 30.3-/    | 5.7     | 9.3      | 25.10  | 1 |
| Shi et al. 2009    | PNw   | <i>qPN.C5-1</i>                | C05 | P10M10-330 / CB10124   | 0.4-1.0   | 2.9-2.9 | 4.4-4.8  | +      | 2 |
| Shi et al. 2009    | PNw   | <i>qPN.A10-1</i>               | C05 | Na10D11 / P11M10-140   | /-24.4    | 3.1-3.9 | 6.5-6.9  | +      | 2 |
| Current study      | PN    | <i>qPN.C06-1</i>               | C06 | BoSF1254 / BoSF2507    | 17.9-18.8 | 4.4     | 15.0     | 7.29   | 2 |
| Ding et al. 2012   | PNw   | <i>PNNP-C6</i>                 | C06 | BnGMS118 / MR133.1     | 18.1-18.9 | /       | 13.2     | -      | 2 |
| Shi et al. 2009    | PNw   | <i>qPN.C6-1</i>                | C06 | PA28 / rFT2-a          | 28.6-30.8 | 2.9     | 5.8      | -11.90 | 1 |
| Radoev et al. 2008 | PNw   | <i>Sil/dm<sup>2</sup>_N16</i>  | C06 | CB10211b / CB10632     | 33.7-36.3 | 6.6     | 5.7      | 1.98   | 1 |
| Ding et al. 2012   | PNw   | <i>PNNP-C8</i>                 | C08 | BnGMS319 / HBr150      | 27.7-28.5 | /       | 8.1      | +      | 1 |
| Ding et al. 2012   | PNw   | <i>PNLN-C8</i>                 | C08 | CNU296 / HBr123        | 29-30.4   | /       | 9        | +      | 1 |
| Ding et al. 2012   | PNw   | <i>PNLN-C9</i>                 | C09 | BoGMS0989 / e3m9a      | 2.3-/     | /       | 12       | +      | 1 |
| Shi et al. 2009    | PNw   | <i>qPN.C9-1</i>                | C09 | SA30 / S15M04-2-92     | 28.0-/    | 7.5     | 11.6     | 28.90  | 1 |
| Shi et al. 2009    | PNw   | <i>qPN.C9-2</i>                | C09 | E2HM34-260 / Na12G04   | /-33.5    | 5.9     | 9.4      | 31.20  | 1 |
| Shi et al. 2009    | PNw   | <i>qPN.C9-3</i>                | C09 | Na10D07b / S05M05-130  | 39.4-41.7 | 3.0-3.0 | 5.4-5.5  | +      | 2 |
| Shi et al. 2013    | PNw   | <i>qPN-OP3-C9</i>              | C09 | HR-Sp1-170 / pw155a    | 41.7-43.6 | 4.3     | 10.0     | -      | 1 |
| Current study      | SNPP  | <i>qSN.A01-1</i>               | A01 | BoSF2770 / niab106     | 0.5-1.5   | 4.2     | 8.8      | -1.01  | 1 |
| Shi et al. 2009    | SNPPw | <i>qSN.A1-1</i>                | A01 | niab71 / CNU142        | 0.7-1.5   | 2.4-3.9 | 4-6.1    | ±      | 2 |
| Shi et al. 2009    | SNPPw | <i>qSN.A1-2</i>                | A01 | niab096 / EST156a      | 2.0-2.1   | 2.7-8.1 | 4.7-12.2 | +      | 2 |

|                  |       |                                           |     |                             |           |         |          |       |   |
|------------------|-------|-------------------------------------------|-----|-----------------------------|-----------|---------|----------|-------|---|
| Shi et al. 2009  | SNPPw | <i>qSN.A1-3</i>                           | A01 | sR11990a / RA2G09           | 4.0-5.5   | 2.5-2.8 | 5.5-5.8  | +     | 2 |
| Shi et al. 2009  | SNPPw | <i>qSN.A1-4</i>                           | A01 | E5HM31-505 / S10M16-2-130   | /-        | 4.9-6.7 | 8.8-11.4 | +     | 2 |
| Shi et al. 2009  | SNPPw | <i>qSN.A1-5</i>                           | A01 | CNU235 / O112F11            | 6.6-7.0   | 5.5-7.1 | 9.5-10   | +     | 2 |
| Shi et al. 2009  | SNPPw | <i>qSN.A1-7</i>                           | A01 | E10HM34-230 / EST165        | /-8.7-/   | 4.3-5.5 | 4.2-9.7  | +     | 2 |
| Qi et al. 2014   | SNPPm | <i>qSNA1</i>                              | A01 | Na14G06 / CB10189           | 8.2-8.9   | /       | 23.54    | 1.93  | 3 |
| Shi et al. 2009  | SNPPw | <i>qSN.A1-6</i>                           | A01 | IGF2071e / EST98b           | /-17.5    | 3-9.1   | 4.3-12.4 | +     | 5 |
| Current study    | SNPP  | <i>qSN.A01-2</i>                          | A01 | TFZIP23 / BrSF0982          | 18.3-19.6 | 3.7     | 2.7      | -0.89 | 2 |
| Wang et al. 2010 | SNPPw | <i>qSS1</i>                               | A01 | ME6EM8d / ME3EM8a           | /-        | 2.9     | 8.41     | -3.6  | 1 |
| Current study    | SNPP  | <i>qSN.A02-1</i>                          | A02 | niab025 / MR052             | 0.1-1.8   | 4.7     | 5.3      | 0.36  | 1 |
| Shi et al. 2013  | SNPPw | <i>qSN-OP1-A2b/qSN-OP2-A2</i>             | A02 | BnSIZ1-A2 / BnMGD2-A2b      | 2.0-3.0   | 7.9     | 14.5     | -     | 2 |
| Shi et al. 2013  | SNPPw | <i>qSN-OP3-A2/qSN-OP1-A2a/qSN-LP3-A2</i>  | A02 | sR6293a / BnSIZ1-A2         | 3.0-4.7   | 4.5     | 9.4      | -     | 3 |
| Ding et al. 2012 | SNPPw | <i>SNLP-A2</i>                            | A02 | Na14H11 / B049H14           | 4.2-4.5   | /       | 11.2     | -     | 1 |
| Current study    | SNPP  | <i>qSN.A02-2</i>                          | A02 | BrSF0755 / BoSF2100         | 6.0-8.3   | 5.8     | 7.0      | 1.11  | 3 |
| Shi et al. 2009  | SNPPw | <i>qSN.A2-1</i>                           | A02 | pX154 / pX155               | 10.2-10.3 | 10.2    | 15.5     | -1.81 | 1 |
| Shi et al. 2013  | SNPPw | <i>qSN-LP1-A2a/qSN-LP1-A2b/qSN-LP2-A2</i> | A02 | ZAAS113 / B084M08a          | 10.3-13.1 | 3.7     | 6.8      | -     | 3 |
| Current study    | SNPP  | <i>qSN.A02-3</i>                          | A02 | BoSF2214 / Na14B05          | 22.4-22.7 | 4.2     | 4.3      | 0.32  | 2 |
| Shi et al. 2009  | SNPPw | <i>qSN.A2-2</i>                           | A02 | S10M16-2-210 / S10M03-1-280 | /-        | 3.0     | 5.5      | -0.98 | 1 |
| Current study    | SNPP  | <i>qSN.A03-1</i>                          | A03 | BrSF0427 / BoSF2392a        | 1.5-4.1   | 4.3     | 16.3     | -1.73 | 1 |
| Shi et al. 2013  | SNPPw | <i>qSN-LP3-A3b</i>                        | A03 | HBr049 / CNU098             | 12.8-13.5 | 4.2     | 8.0      | +     | 1 |
| Shi et al. 2009  | SNPPw | <i>qSN.A3-1</i>                           | A03 | CNU210 / S13M08-1-157       | 15.3-15.7 | 2.3-3.9 | 4.5-5.6  | ±     | 2 |
| Ding et al. 2012 | SNPPw | <i>SNLP-A3</i>                            | A03 | CNU270 / HBr131             | 15.4-16.2 | /       | 11.4     | -     | 1 |
| Current study    | SNPP  | <i>qSN.A03-2</i>                          | A03 | BrSF0708 / CB10425          | 23.3-24.6 | 3.1     | 4.3      | -0.82 | 1 |
| Ding et al. 2012 | SNPPw | <i>SNNP-A3</i>                            | A03 | BoGMS1539 / BoGMS0408       | 25.5-27.3 | /       | 16.1     | +     | 1 |
| Shi et al. 2009  | SNPPw | <i>qSN.A4-2</i>                           | A04 | IGF3395d / IGF3391a         | 0.0-0.5   | 6.7-7.5 | 8.5-12.1 | -     | 2 |
| Shi et al. 2013  | PNw   | <i>qPN-LP3-A4</i>                         | A04 | BnLPR2-A4 / znS13M26-220    | 4.3-8.7   | 3.5     | 7.5      | +     | 1 |
| Shi et al. 2009  | SNPPw | <i>qSN.A4-3</i>                           | A04 | HUA39 / CNU360              | 15.9-16.2 | 2.7-3   | 5.6-6.1  | +     | 2 |
| Shi et al. 2009  | SNPPw | <i>qSN.A4-4</i>                           | A04 | CNU256 / E9HM31-80          | 16.2-17.2 | 4.5-8.1 | 7.7-13.2 | +     | 2 |
| Shi et al. 2009  | SNPPw | <i>qSN.A4-5</i>                           | A04 | E10HM34-180 / S14M08-2-270  | /-        | 3-3.3   | 3.7-4.1  | ±     | 2 |
| Shi et al. 2009  | SNPPw | <i>qSN.A4-1</i>                           | A04 | E6HM31-400 / P7M1-275       | /-        | 3.3-7   | 6.1-14   | +     | 2 |
| Shi et al. 2009  | SNPPw | <i>qSN.A5-1</i>                           | A05 | CNU257 / BRAS063            | 3.2-3.3   | 3.9     | 7.6      | -0.54 | 1 |

|                    |       |                               |     |                             |           |         |         |       |    |
|--------------------|-------|-------------------------------|-----|-----------------------------|-----------|---------|---------|-------|----|
| Shi et al. 2013    | PNw   | <i>qPN-OP1-A5</i>             | A05 | BnPHT1-A5 / sN12353b        | 3.2-4.4   | 3.4     | 6.6     | +     | 1  |
| Current study      | SNPP  | <i>qSN.A05-1</i>              | A05 | BrSF0712 / BoSF2141         | 5.8-7.8   | 4.1     | 4.7     | -1.03 | 3  |
| Radoev et al. 2008 | SNPPm | <i>S/Sil_N5</i>               | A05 | MD21 / MR113                | 8.0-12.4  | 14.1    | 11.8    | -1.55 | 1  |
| Shi et al. 2009    | SNPPw | <i>qSN.A5-2</i>               | A05 | CNU206 / pW161-2b           | 11.2-12.8 | 3.9     | 6       | -0.78 | 1  |
| Wang et al. 2010   | SNPPw | <i>qSS5</i>                   | A05 | ME1EM6b / ME7EM6c           | /-/       | 2.4     | 7.87    | -5.38 | 1  |
| Cai et al. 2014    | SNPPm | <i>UN</i>                     | A06 | BnGMS583                    | /-16.8-/  | 3.6     | 4.8     | 0.7   | 1  |
| Current study      | SNPP  | <i>qSN.A06-1</i>              | A06 | BrSF0819 / BrSF0144         | 22.6-23.7 | 11.0    | 32.1    | 1.97  | 13 |
| Ding et al. 2012   | SNPPw | <i>SNLP-A6</i>                | A06 | BnGS1 / em13me5             | /-/       | /       | 13      | +     | 2  |
| Shi et al. 2009    | SNPPw | <i>qSN.A7-1</i>               | A07 | CNU063 / RA2G08             | 0.8-5.2   | 3.3     | 5.6     | 0.62  | 1  |
| Current study      | SNPP  | <i>qSN.A07-1</i>              | A07 | BoSF2344 / AT1G27050        | 5.0-8.9   | 5.9     | 6.9     | 0.75  | 2  |
| Cai et al. 2014    | SNPPm | <i>UN</i>                     | A07 | BrGMS4507                   | /-10.3-/  | 3.1     | 5.2     | 1.38  | 1  |
| Current study      | SNPP  | <i>qSN.A07-2</i>              | A07 | CN64 / CNU339               | 15.0-20.1 | 6.0     | 10.8    | 0.86  | 4  |
| Current study      | SNPP  | <i>qSN.A07-3</i>              | A07 | BoGMS2110 / CNU053          | 20.8-22.5 | 3.9     | 3.8     | 0.48  | 3  |
| Qi et al. 2014     | SNPPm | <i>qSNA7</i>                  | A07 | T10 / EA2MG2a               | /-/       | /       | 3.75    | 0.77  | 3  |
| Zhang et al. 2011  | SNPPm | <i>qSS.N8-1</i>               | A08 | EA02MG05-210 / CB10026      | 7.2-9.2   | 4.4     | 12.23   | -3.10 | 3  |
| Ding et al. 2012   | SNPPw | <i>SNLP-A8</i>                | A08 | H012K23 / BnPAP25           | 12.0-12.7 | /       | 9.4     | +     | 1  |
| Qi et al. 2014     | SNPPm | <i>qSNA8</i>                  | A08 | niab050 / Lat21-2           | 16.5-17.6 | /       | 5.51    | -0.93 | 3  |
| Shi et al. 2009    | SNPPw | <i>qSN.A8-1</i>               | A08 | CNU489 / P7M5-170           | /-/       | 2.6-3.3 | 4.4-5.2 | -     | 2  |
| Zhang et al. 2011  | SNPPm | <i>qSS.N8-3</i>               | A08 | SA06TC14-270 / S77096       | /-/       | 2.9     | 9.63    | 2.73  | 1  |
| Zhang et al. 2011  | SNPPm | <i>qSS.N8-4</i>               | A08 | SA06TC14-270 / S77096       | /-/       | 2.5     | 8.35    | 2.83  | 2  |
| Zhang et al. 2011  | SNPPm | <i>qSS.N8-2</i>               | A08 | SA10TC11-100 / SA03TC09-370 | /-/       | 2.9     | 10.6    | 4.07  | 3  |
| Shi et al. 2009    | SNPPw | <i>qSN.A9-1</i>               | A09 | P04M21-130 / IGF5222b       | 1.0-1.8   | 4.1     | 6.5     | 0.77  | 1  |
| Ding et al. 2012   | SNPPw | <i>SNNP-A9</i>                | A09 | HBr199c / HBr097c           | 1.2-1.8   | /       | 10.5    | -     | 2  |
| Shi et al. 2013    | SNPPw | <i>qSN-LP1-A9b</i>            | A09 | IGF5385f / IGF5222b         | 1.8-2.0   | 4.7     | 8.4     | +     | 1  |
| Shi et al. 2009    | SNPPw | <i>qSN.A9-2</i>               | A09 | CB10311 / pW203b            | 7.2-8.6   | 4.1     | 5.4     | 0.76  | 1  |
| Shi et al. 2013    | SNPPw | <i>qSN-LP1-A9a/qSN-OP2-A9</i> | A09 | H055O17-4 / HBr096          | 25.1-29.8 | 3.9     | 6.9     | +     | 2  |
| Current study      | SNPP  | <i>qSN.A09-1</i>              | A09 | BnSF2342-39 / BnID082       | 28.1-29.1 | 3.6     | 4.9     | 0.59  | 2  |
| Shi et al. 2009    | SNPPw | <i>qSN.A9-3</i>               | A09 | niab33 / pW123aH            | 30.0-31.2 | 3.0     | 5.6     | -0.47 | 1  |
| Qi et al. 2014     | SNPPm | <i>qSNA9</i>                  | A09 | CNU034 / niab038            | /-/       | /       | 2.73    | -0.66 | 3  |
| Ding et al. 2012   | SNPPw | <i>SNLP-A10</i>               | A10 | Na10D07 / S002B15-1         | 10.5-11.5 | /       | 12.8    | +     | 1  |

|                    |       |                               |     |                             |           |         |         |       |   |
|--------------------|-------|-------------------------------|-----|-----------------------------|-----------|---------|---------|-------|---|
| Ding et al. 2012   | SNPPw | <i>SNLP-C1</i>                | C01 | CB10369 / BoGMS0806         | 6.3-8.3   | /       | 11.9    | +     | 1 |
| Wang et al. 2010   | SNPPw | <i>qSS11</i>                  | C01 | O112F11a / ME5EM9c          | 10.1-12.1 | 3.0     | 24.37   | -5.51 | 1 |
| Shi et al. 2013    | SNPPw | <i>qSN-LP2-C1</i>             | C01 | ZAAS156b / znS08M15-80      | 19.1-22.0 | 3.6     | 7.1     | -     | 1 |
| Shi et al. 2013    | SNPPw | <i>qSN-OP2-C1</i>             | C01 | BnGPT2-C1 / pW190b          | 28.3-29.3 | 3.5     | 7.5     | -     | 1 |
| Shi et al. 2013    | SNPPw | <i>qSN-OP1-C1</i>             | C01 | HR-Sp2-170 / BRMS175        | 36.5-38.8 | 3.7     | 6.3     | -     | 1 |
| Radoev et al. 2008 | SNPPm | <i>S/Sil_N11</i>              | C01 | CB10536 / CB10357b          | 35.3-37.7 | 15.6    | 8.2     | -1.49 | 1 |
| Current study      | SNPP  | <i>qSN.C02-1</i>              | C02 | BoSF1425 / CNU461           | 0.8-2.2   | 3.8     | 6.7     | -0.71 | 1 |
| Shi et al. 2009    | SNPPw | <i>qSN.C2-1</i>               | C02 | pW119 / sR12095             | 1.4-1.7   | 2.6-3.4 | 3.3-4.7 | +     | 2 |
| Ding et al. 2012   | SNPPw | <i>SNNP-C3</i>                | C03 | BoGMS0576 / MR123           | 9.1-10.0  | /       | 17.3    | +     | 1 |
| Qi et al. 2014     | SNPPm | <i>qSNC3</i>                  | C03 | t8_at_3 / CNU270            | 23.2-/-   | /       | 5.12    | 0.90  | 3 |
| Shi et al. 2009    | SNPPw | <i>qSN.C3-1</i>               | C03 | IGF1141f / E7HM31-450       | 30.3-/-   | 8.6     | 10.8    | -1.43 | 1 |
| Zhang et al. 2011  | SNPPm | <i>qSS.N13-2</i>              | C03 | EA02MC05-160 / EA13MC01-160 | /-/-      | 3.4     | 9.7     | -2.31 | 2 |
| Zhang et al. 2011  | SNPPm | <i>qSS.N13-1</i>              | C03 | EA02MC05-160 / EA13MC01-160 | /-/-      | 5.8     | 15.21   | -3.21 | 2 |
| Ding et al. 2012   | SNPPw | <i>SNNP-C5</i>                | C05 | BnGMS352 / BnGMS309         | 15.3-16.0 | /       | 11.5    | -     | 1 |
| Ding et al. 2012   | SNPPw | <i>SNLP-C5</i>                | C05 | O110A10 / sS2129            | 24.5-25.7 | /       | 14.7    | +     | 1 |
| Shi et al. 2009    | SNPPw | <i>qSN.C6-4</i>               | C06 | HUA64-2 / Na12E01a          | 16.9-18.1 | 4.3     | 6.9     | 0.88  | 1 |
| Current study      | SNPP  | <i>qSN.C06-1</i>              | C06 | BoSF1254 / BoSF1126         | 17.8-19.0 | 3.7     | 4.7     | 0.72  | 2 |
| Shi et al. 2009    | SNPPw | <i>qSN.C6-3</i>               | C06 | CB10010 / IGF3380b          | 20.2-20.5 | 4.1-4.2 | 3.6-7.7 | +     | 2 |
| Shi et al. 2009    | SNPPw | <i>qSN.C6-2</i>               | C06 | E5HM40-205 / BRMS015        | 20.6-21.1 | 3.9     | 6.8     | 0.62  | 1 |
| Shi et al. 2009    | SNPPw | <i>qSN.C6-1</i>               | C06 | pW134 / AP1a                | 29.6-32.0 | 3.9     | 6.8     | 0.71  | 1 |
| Current study      | SNPP  | <i>qSN.C06-2</i>              | C06 | BoSF1951 / CNU331a          | 30.6-34.2 | 4.6     | 8.6     | 1.03  | 2 |
| Shi et al. 2013    | SNPPw | <i>qSN-OP3-C6b/qSN-LP1-C6</i> | C06 | BnPHT1-C6 / PA28            | 34.4-36.0 | 4.2     | 8.6     | +     | 2 |
| Qi et al. 2014     | SNPPm | <i>qSNC6</i>                  | C06 | CNU182 / CNU052             | 34.8-35.9 | /       | 0.78    | 0.35  | 3 |
| Shi et al. 2013    | SNPPw | <i>qSN-LP3-C6/qSN-OP3-C6a</i> | C06 | IGF1226b / BnPHT1-C6        | 36.1-36.9 | 4.0     | 9.2     | +     | 2 |
| Wang et al. 2010   | SNPPw | <i>qSS16a</i>                 | C06 | ME6EM4d / ME3EM4b           | /-/-      | 2.6     | 8.57    | -5.85 | 1 |
| Wang et al. 2010   | SNPPw | <i>qSS16b</i>                 | C06 | ME6EM4d / ME3EM4b           | /-/-      | 3.7     | 14.31   | -6.15 | 1 |
| Shi et al. 2009    | SNPPw | <i>qSN.C8-2</i>               | C08 | IGF3369a / MR64             | 28.8-31.4 | 5.5     | 5.1     | 0.73  | 1 |
| Shi et al. 2009    | SNPPw | <i>qSN.C8-3</i>               | C08 | sN11670a / IGF2529z         | 31.8-33.6 | 5.3-7.4 | 5.4-7.8 | +     | 2 |
| Shi et al. 2009    | SNPPw | <i>qSN.C8-4</i>               | C08 | IGF2529z / pW123cE          | 33.6-35.3 | 4.6     | 4.3     | 0.39  | 1 |
| Shi et al. 2009    | SNPPw | <i>qSN.C8-1</i>               | C08 | S15M04-2-100 / O112G04      | /-/-      | 3.4-5.4 | 5.1-5.2 | -     | 2 |

|                    |       |                  |     |                        |           |         |         |      |   |
|--------------------|-------|------------------|-----|------------------------|-----------|---------|---------|------|---|
| Shi et al. 2009    | SNPPw | <i>qSN.C9-2</i>  | C09 | E2HM34-260 / Na12G04   | 33.2-34.0 | 2.6-6.4 | 4.3-8.6 | -    | 6 |
| Zhang et al. 2011  | SNPPm | <i>qSS.N19</i>   | C09 | EA13MC03-150 / Na10D07 | 39.4-/-   | 2.5     | 6.11    | 2.07 | 1 |
| Shi et al. 2009    | SNPPw | <i>qSN.C9-3</i>  | C09 | IGF5193b / CB10288     | 39.0-40.0 | 2.3-5.9 | 3.2-8.1 | -    | 6 |
| Zhang et al. 2012  | SNPPm | <i>qSS.C9</i>    | C09 | SRC9-022 / SA09MC04    | 44.6-46.0 | 22.5    | 57      | 5.40 | 3 |
| Radoev et al. 2008 | SNPPm | <i>S/Sil_N19</i> | C09 | CB10345 / Na10B11b     | 11.1-12.4 | 6.1     | 3.6     | 0.99 | 1 |
| Shi et al. 2009    | SNPPw | <i>qSN.C9-1</i>  | C09 | SA30 / S15M04-2-92     | /-/-      | 2.7-5.8 | 3.4-7.9 | -    | 4 |
| Cai et al. 2014    | SNPPm | /                | /   | EA05MC08_8             | /-/-      | 3.07    | 3.96    | 0.8  | 1 |
| Cai et al. 2014    | SNPPm | /                | /   | EA06MC09_10            | /-/-      | 3.45    | 4.44    | 1.4  | 1 |
| Cai et al. 2014    | SNPPm | /                | /   | EA06MG08_9             | /-/-      | 3.02    | 3.85    | 2.1  | 1 |
| Cai et al. 2014    | SNPPm | /                | /   | EA06MG10_5             | /-/-      | 3.63    | 4.7     | 1.5  | 1 |
| Cai et al. 2014    | SNPPm | /                | /   | EA08MC10_5             | /-/-      | 3.45    | 4.4     | 1.1  | 1 |

**Table S8** Information of the putative single-locus SSR markers chosen from the target major QTL region for use in regional association analysis.

| Marker name | Scaffold start (bp) | Scaffold end (bp) | Forward_primer (5'-3')      | Reverse_primer (5'-3')  | Tm (°C) forward | Tm (°C) reverse | Product size | Polymorphism & single-locus |
|-------------|---------------------|-------------------|-----------------------------|-------------------------|-----------------|-----------------|--------------|-----------------------------|
| BrSF47-179  | 373,862             | 373,877           | TTGGATGAGCGTAGTTGTGG        | TTTTGGATGCCCTAAGCAAT    | 60              | 60              | 152          | √                           |
| BrSF47-175  | 371,407             | 371,420           | TCCATCAATAATGAACATGCG       | ATATCCGCGTAATAATTTAGCAA | 59              | 57              | 264          |                             |
| BrSF47-163  | 342,625             | 342,646           | AACGCGAGCAATTAGGAGAA        | CAAGCCCACCTCAATAATCG    | 60              | 60              | 250          | √                           |
| BrSF47-127  | 268,155             | 268,170           | TTTGAATACAATATTATCCATTGTTCA | TGCTGATTGTCCACATTCTCCAT | 58              | 61              | 218          |                             |
| BrSF47-78   | 171,249             | 171,262           | TTCCTAAACATTCTTTAATTTTGTGC  | TTTTACGTGACGTGGTGGAG    | 59              | 60              | 261          | √                           |
| BrSF47-71   | 156,414             | 156,427           | CAAATATTTCTGGCGTCGT         | CCGGATCAGTCGATAGGTCT    | 60              | 59              | 131          |                             |
| BrSF47-54   | 114,543             | 114,686           | GAGTTGAAACCCCAAGCAAG        | GCGAAACAGAGGCAATAAGG    | 60              | 60              | 219          | √                           |
| BrSF47-23   | 44,651              | 44,677            | GATCTATAAGGGCGCTGCAA        | ATTGGCCCAAATCTCTTGA     | 60              | 60              | 235          | √                           |
| BrSF47-10   | 25,879              | 25,898            | ATCAATTTTCCGAGACCCC         | AAGCTGGTGAACCTCGTTTCG   | 60              | 60              | 264          | √                           |
| BrSF46-1    | 1,253               | 1,267             | TCCCCATTAAGTAGGAGAGGC       | CGGTGAGGAAATCCATGTTT    | 60              | 60              | 185          |                             |
| BrSF46-3    | 8,690               | 8,703             | TTGTTCTCAGAAACCATGAGAGA     | TGGCCAAACATTATGGTCATT   | 59              | 60              | 151          |                             |
| BrSF46-7    | 15,318              | 15,330            | CTGGTTCGAGACAGAAACACA       | TTCCGATTTGGAACACAAA     | 59              | 59              | 276          | √                           |
| BrSF46-15   | 33,566              | 33,581            | GTGGGGAAGTACCGAGCTTT        | CCACATCATTGTGTTTGCCA    | 60              | 60              | 267          |                             |
| BrSF46-20   | 37,841              | 37,858            | AAGGTCAGGATTATGGGGCT        | AAAACTTTGCATGATCGGCT    | 60              | 60              | 212          |                             |
| BrSF46-22   | 44,114              | 44,245            | TCGTGTAAGTGAGAGGAGAGTAAAGA  | AGCTGGTGCAGTATGTCAGC    | 60              | 59              | 229          |                             |
| BrSF46-27   | 53,797              | 53,813            | ATCTTGACATTTTCGAGGCGT       | TTCATGAATCCATTAGGCTCC   | 60              | 59              | 252          |                             |
| BrSF46-28   | 54,246              | 54,257            | CGTGGCGACATGTCTGAATA        | AGGTAGGGAGGGGATTTGAA    | 61              | 60              | 171          | √                           |
| BrSF46-49   | 94,698              | 94,709            | TGCATTTTCATTTTCATGCCA       | AATGATTGAAATACGGTGGGA   | 61              | 59              | 275          | √                           |
| BrSF46-75   | 145,365             | 145,382           | GTGACAGCTGTTGGCTGTTG        | CTCATGCACGCTCTCCCTAT    | 61              | 60              | 247          |                             |
| BrSF46-78   | 148,450             | 148,574           | TGCATAATCACCTAATACTAGTTTGC  | GCACAGCCAACGTTTTGAA     | 58              | 61              | 280          | √                           |
| BrSF46-117  | 210,176             | 210,224           | CCATTCTGCCTCTCTCCTTG        | GGCCTTATTGGAAGCATGAA    | 60              | 60              | 184          | √                           |
| BrSF46-136  | 246,805             | 246,818           | GTCAGGAGGTAAGAGCGGTG        | ATCCGATTCTCTTGCCATCA    | 60              | 61              | 166          | √                           |
| BrSF46-141  | 249,690             | 249,745           | GCTAGTCAAGCTTCGTCGGT        | TCGATATTCCAGAAGGCAGG    | 60              | 60              | 245          |                             |
| BrSF46-142  | 249,860             | 249,943           | TTTGATAGCCTGCCTTCTGG        | TCCGAGGATTTCGTTGGTTAG   | 60              | 60              | 237          |                             |
| BrSF46-160  | 291,338             | 291,352           | CAGATCGTTGCCACATCAGT        | ACTCCAAGCCTCTGTGCTA     | 60              | 60              | 217          |                             |
| BrSF46-161  | 291,761             | 291,776           | CCCAAAAATAATACTCCCTCCG      | ATCTGTTACACCGCAATCCG    | 61              | 61              | 276          | √                           |

|            |         |         |                            |                           |    |    |     |   |
|------------|---------|---------|----------------------------|---------------------------|----|----|-----|---|
| BrSF46-162 | 293,215 | 293,234 | TCTTCACTCCTACCCCTCCC       | GAAAAGCGAAGACGGAAATG      | 60 | 60 | 208 |   |
| BrSF46-166 | 299,780 | 299,793 | TTACGTTTTTTGGGCTTGGTC      | TGGCTTGACCCAGTCTTTA       | 60 | 61 | 164 |   |
| BrSF46-167 | 303,352 | 303,389 | TCGGCTAGAATGGCTACAAGA      | TGCCATTTCGTGTATGTTTG      | 60 | 60 | 273 | √ |
| BrSF46-176 | 315,522 | 315,543 | ATCACCATTGTGTTATTTCTTCAG   | GGATCAAATGGATTTAGCGG      | 57 | 59 | 256 |   |
| BrSF46-177 | 316,223 | 316,240 | AGCTGGTACATGATTGCGTG       | CAACTCTGCCATTACATGC       | 60 | 60 | 268 | √ |
| BrSF46-186 | 324,357 | 324,370 | GCCAAAGTGCATCCCATCTA       | CCTTTGGAAAGTCGAGAGACC     | 61 | 60 | 161 | √ |
| BrSF46-204 | 345,157 | 345,170 | TCCAACCGATTCAACCAAAT       | TGTATGCCAAAATAACATTCATCT  | 60 | 58 | 206 |   |
| BrSF46-211 | 353,809 | 353,823 | GCCTTTAGTTTGCAACCATTC      | AAAACACTTTGCGATTTGGG      | 59 | 60 | 251 |   |
| BrSF46-213 | 358,746 | 358,760 | GGAGATAGCTTTACGGTGCG       | TCATGGGTCCACACATACATTT    | 60 | 60 | 220 |   |
| BrSF46-220 | 371,686 | 371,756 | CGCTGTCTCTTCGCTTCTCT       | ATCGACGCCAAATCTAAACC      | 60 | 59 | 246 |   |
| BrSF46-223 | 385,268 | 385,303 | GGGTTTAGAGATAAAGAATGGAGTTT | TGAAAATAATGAACAATTCTCTCAA | 59 | 58 | 255 |   |
| BrSF46-230 | 407,280 | 407,354 | TGAGGTACAACTTCACAATCTTACA  | GTACCATCGGATTTTGGTGG      | 59 | 60 | 258 |   |
| BrSF46-232 | 407,786 | 407,799 | TTGAGAAGAATTAGAAGAAAAGACGA | CAGCTATTACTCCTTCCGTTTCA   | 59 | 60 | 278 |   |
| BrSF46-235 | 416,782 | 416,893 | TGAATTGGGAACAGCTAGGG       | GGTGAGTTCGAGTCGGGTTA      | 60 | 60 | 209 |   |
| BrSF46-238 | 422,781 | 422,806 | TTGCGAGATTATTTTTAGATATGTGC | GAAAGCGTGAATCAAAAACG      | 60 | 58 | 146 | √ |
| BrSF46-240 | 429,763 | 429,776 | TGAAAAAGGAGTTCAGAGTAAAACAA | TGTGAAAGGATTGAACATTGC     | 60 | 59 | 280 |   |
| BrSF46-256 | 459,725 | 459,850 | TGAATGCAACCACCTCACAT       | GTCTTGAGGAGCAGCGAAAT      | 60 | 60 | 236 |   |
| BrSF46-259 | 467,296 | 467,321 | GGGCAGGCTAACCCTAGTA        | GAAGACGACGACATCGGTTTA     | 60 | 60 | 276 | √ |
| BrSF46-265 | 477,163 | 477,177 | TGTGAGGTGACCATTGTTTTTA     | CGTGGTCAATGAAACACACA      | 58 | 59 | 249 | √ |
| BrSF46-267 | 483,948 | 484,041 | TATTATCTTCTCCCGGCGAC       | AAGTATTAAGGACGGCGGA       | 59 | 59 | 278 |   |
| BrSF46-269 | 485,062 | 485,079 | TCAATGTTTCCCTCTTCTTTGA     | CCCAAGGATTTAGGATTTAGGG    | 59 | 60 | 256 |   |
| BrSF46-276 | 490,198 | 490,213 | AACCATGTTACACCGTCCG        | CAGTTTTGAATTTTATTTTGGGG   | 61 | 59 | 264 |   |
| BrSF46-286 | 508,142 | 508,159 | TGCTCTGCATAATCACATTTCA     | ATTTGATTGTCCGCTTCATT      | 59 | 57 | 260 |   |
| BrSF46-288 | 516,227 | 516,242 | ACTGGTCAAGTGGTCCTTGG       | CACTGATGATCGTTGCTGCT      | 60 | 60 | 223 |   |
| BrSF46-291 | 523,348 | 523,362 | CCACGTCTGAGGTGAGGTTT       | CTTTTCTTCAATGCCACCGT      | 60 | 60 | 183 | √ |
| BrSF46-292 | 523,613 | 523,640 | ACGGTGGCATTGAAGAAAAG       | TTCTCTCTCCACACACAACA      | 60 | 59 | 237 |   |
| BrSF46-306 | 557,446 | 557,469 | ATGATCATGTGGACCGTTGA       | TGATTGTTATTCCCAACTTTTTAGG | 60 | 60 | 233 | √ |
| BrSF46-314 | 573,510 | 573,524 | TTGGGCCTCACTGATAGTCC       | TCAAACAAAGCCCAAACC        | 60 | 60 | 237 |   |
| BrSF46-319 | 578,293 | 578,349 | TTTTTGGGCTTGGTCTACGA       | CCTCTGTCTTCGGAGCAAGT      | 61 | 60 | 248 |   |
| BrSF46-325 | 589,391 | 589,420 | TTTCAAGCTGACGTGGACAG       | AACATTGGTGCTTGATTGTGA     | 60 | 59 | 202 |   |

|            |           |           |                            |                           |    |    |     |   |
|------------|-----------|-----------|----------------------------|---------------------------|----|----|-----|---|
| BrSF46-353 | 651,753   | 651,776   | GCCACTGGGTCAAATGTCT        | TTGGTGAGACGACTTGTGATTT    | 60 | 60 | 251 | ✓ |
| BrSF46-367 | 680,283   | 680,308   | TCAAGGTAAATTCCCATCCA       | CATTGTGCTTGGAGATGGTG      | 58 | 60 | 224 |   |
| BrSF46-383 | 706,218   | 706,260   | CCATTTTTCATCTTACCTTATTTTGC | CCTAGCCAAAACCATTCTATGT    | 60 | 57 | 280 | ✓ |
| BrSF46-386 | 712,186   | 712,220   | TTGGTAAGAAAATGAATCTTGGG    | GCGGGTCAAAGGCTAGTTCT      | 59 | 61 | 263 |   |
| BrSF46-407 | 765,285   | 765,304   | TGGGACAGAAATCAAATCCC       | GTGGCGGAGAAAAGAACTG       | 60 | 60 | 143 | ✓ |
| BrSF46-415 | 779,110   | 779,134   | TTCTTCCTCTCGGCTTCGTA       | CATGCATTTTCTGCTTTTGC      | 60 | 59 | 239 |   |
| BrSF46-432 | 810,447   | 810,528   | TTGGGGTTGTTTCATGTTTG       | CGGTAGTCCACGGGAAATTA      | 59 | 60 | 191 | ✓ |
| BrSF46-439 | 828,748   | 828,779   | CCAGTCGTTCTCTCTGAGGC       | GGGCGTATGGATTTGCTAGA      | 60 | 60 | 277 |   |
| BrSF46-454 | 864,942   | 865,005   | CGGTCAGTTACGGCAAAGT        | CACCTTTCGCTTTTGTCTTTT     | 60 | 60 | 280 | ✓ |
| BrSF46-467 | 903,409   | 903,441   | TGCTCTGCACAACTCCATC        | TGGAAGCTTGGAGGAAGAAA      | 60 | 60 | 272 | ✓ |
| BrSF46-485 | 945,845   | 945,866   | TCCCCCAAATAAATATCCACA      | GGCCTCAGAGGAGACAAGAA      | 60 | 60 | 279 |   |
| BrSF46-509 | 976,750   | 976,783   | AGCCACTAGGAGCAAGATGA       | TTTGTGTGCTTTTTGGGGG       | 58 | 60 | 237 | ✓ |
| BrSF46-533 | 1,019,716 | 1,019,824 | TGACCAATTACAGAGCGTCG       | GGCCTTAACGGTTCCTCAAT      | 60 | 60 | 244 |   |
| BrSF46-541 | 1,041,232 | 1,041,258 | CCAACAGTGGAGCCTAAAGC       | CTCGTTTGTGCTGGTGTTA       | 60 | 60 | 232 |   |
| BrSF46-551 | 1,050,185 | 1,050,292 | TTCACGTACGTACTCGATTTCTTC   | TGAGAAAGGGAGTTTCCTGG      | 60 | 59 | 241 | ✓ |
| BrSF46-552 | 1,050,924 | 1,050,943 | CCTTCTCCGCGAAGTATCAG       | GCAGAAACAGAGGCAAGACC      | 60 | 60 | 276 |   |
| BrSF46-554 | 1,053,021 | 1,053,042 | GCGCTCTATTTGGTTGCTC        | GAGGCAAACCACTTGAAAT       | 60 | 59 | 222 |   |
| BrSF46-557 | 1,061,135 | 1,061,154 | GCGAGTAACTTTGGGCAGAC       | GAGTTGCAACCACAACCTGG      | 60 | 59 | 248 |   |
| BrSF46-574 | 1,099,671 | 1,099,697 | TGAGTGTATGTGTTGATGTGGC     | ACAGAAAAGTTTTGGTTATTGCTT  | 59 | 58 | 256 | ✓ |
| BrSF46-576 | 1,103,028 | 1,103,049 | CCCCTATGCAGGCTTAAAT        | TGTTGTTTTCTTTTGTAACTGGGA  | 61 | 60 | 272 |   |
| BrSF46-583 | 1,118,083 | 1,118,123 | CACAGACCAGGGATGTAAGGA      | CATTTAGCAAGCGATGACCA      | 60 | 60 | 213 |   |
| BrSF46-586 | 1,121,623 | 1,121,646 | GTGAAGCCCATCGTCATCTT       | CGAAGACTTTGGAGGAGCAG      | 60 | 60 | 239 | ✓ |
| BrSF46-610 | 1,185,437 | 1,185,540 | TTTTTGTTGTTTCTCACTCAACA    | CATCCATTAATTGGGAACTATGA   | 59 | 58 | 164 |   |
| BrSF46-614 | 1,198,103 | 1,198,124 | TGTTGTTGTACCCGTAATGAAGA    | TTTTTCATGTTTCATCTTTCTCTCT | 59 | 58 | 270 |   |
| BrSF46-619 | 1,204,669 | 1,204,692 | AAAAGATTTGTTTGGAGTTGGAA    | TTGAGGTTTGGTTTGGAAAGAA    | 59 | 60 | 215 |   |
| BrSF46-626 | 1,220,435 | 1,220,547 | TTTTGAAGTTACACCAATTTTCAGA  | ACAAAGCATGCCATCATCAA      | 59 | 60 | 261 | ✓ |
| BrSF46-648 | 1,256,758 | 1,256,783 | GACTTCACTGTTCCACGGT        | CCCTCTACCCATTTCTCAA       | 60 | 60 | 277 |   |
| BrSF46-661 | 1,287,088 | 1,287,111 | CAACGAATTTTAAAGACGCAAC     | TCTTTAAATCGTCTTTTCCATGC   | 59 | 60 | 211 | ✓ |
| BrSF46-673 | 1,309,908 | 1,309,980 | TAAGGGCGTTCACAAACGAT       | AGAAGCTCATCTCTGATGCGT     | 61 | 59 | 234 |   |
| BrSF46-687 | 1,345,821 | 1,345,891 | TATTTTCCCCGTTTCACAA        | TTTTGCTCGTTTTCGATTTT      | 60 | 60 | 203 | ✓ |

|            |           |           |                           |                         |    |    |     |   |
|------------|-----------|-----------|---------------------------|-------------------------|----|----|-----|---|
| BrSF46-700 | 1,379,320 | 1,379,433 | AATTTGGGTAAAACCTTAAACT    | CTCTTCCATAGGTCCGGGAT    | 58 | 60 | 206 | √ |
| BrSF46-711 | 1,411,875 | 1,411,910 | AAAGTAGGAATGAAAAATTTTGGG  | CAAAGCTGAAAGCACGAGTT    | 59 | 58 | 235 |   |
| BrSF46-744 | 1,459,489 | 1,459,620 | AACAAAATTTTCATTGTGGGA     | CAAATCATATCAGTCGAACGTC  | 57 | 59 | 246 |   |
| BrSF46-791 | 1,558,134 | 1,558,266 | TGGAAAATTTAGCAAAGTATAGCAA | TTTTTGCACCGATAAAATTTAAA | 60 | 60 | 248 |   |
| BrSF46-796 | 1,562,809 | 1,562,905 | GCAAAAGCAACAAGAGGGAG      | CTCGTTTCGGTTTCAATTCC    | 60 | 60 | 155 |   |
| BrSF46-799 | 1,564,189 | 1,564,210 | AACCGCTTTATTTGGCAATG      | GCGAGGGACAGAGTGATTTC    | 60 | 60 | 182 |   |
| BrSF46-812 | 1,595,044 | 1,595,075 | TGCATTTAGGGCCCAGTATT      | TGGCTTCGTCGAGAAAATCT    | 59 | 60 | 256 |   |
| BrSF46-827 | 1,622,834 | 1,622,853 | TGTCACGCGTCATTCATAGA      | TGCATGATTTTTGACAGGCT    | 59 | 59 | 268 |   |
| BrSF46-836 | 1,639,161 | 1,639,251 | TCGATCTACAGGAATCTTGAAAAA  | CCAAAACAAGAAAGGTTGGTT   | 59 | 58 | 280 |   |
| BrSF46-837 | 1,641,718 | 1,641,827 | CTGCGATGGAATTGGAATCT      | AGAGTAGCTAGCATCACCAAAAA | 60 | 57 | 245 |   |
| BrSF46-854 | 1,674,049 | 1,674,070 | GGTGGCAGAACCGTAAACAT      | TCTGATGGGTCTTTCGTGTG    | 60 | 60 | 257 |   |
| BrSF46-880 | 1,731,797 | 1,731,856 | GCAGCTTCCACAACAAACAA      | CGAAGTGCGTATTCACAAGC    | 60 | 59 | 137 |   |
| BrSF46-887 | 1,753,395 | 1,753,453 | GCGATCAAAGGATTCAAAGC      | CCTGTCTCCAACAAGTTCCC    | 60 | 60 | 225 |   |
| BrSF46-895 | 1,774,150 | 1,774,183 | CCTCTTCTTCTTGGTCTCGC      | AGGGCATTGTTAAGTCCCTG    | 59 | 59 | 246 |   |
| BrSF46-910 | 1,801,928 | 1,801,997 | GGCTAGTGAAGTAAACGGCG      | AATCTCGGACCGGAGACAT     | 60 | 59 | 280 |   |
| BrSF46-913 | 1,817,946 | 1,818,030 | TGCCAAACCAAACACTTTCA      | GGGAACAGTGGGAGTAGCAA    | 60 | 60 | 219 |   |
| BrSF46-920 | 1,829,662 | 1,829,694 | CTGGTGTAACCTGGTGCAA       | CCCCCTAATGAGTTTGTGC     | 60 | 59 | 238 |   |
